# Supplementary material for: Impaired expression of NER gene network in sporadic solid tumors
Source: PubMed Central journal article supplement — Nucleic Acids Res. 2007 Mar 1;35(6):1859–67. doi: 10.1093/nar/gkm061 (PMC1874609; doi:10.1093/nar/gkm061), 2007-03-01
Supplement: nar_gkm061_1.pdf [file nar_gkm061_1.pdf]

Supporting Online Material for

**Impaired expression of NER gene  
network in sporadic solid tumors**

Mauro A. A. Castro\*<sup>†1,3</sup>, José C. M. Mombach\*<sup>2,4</sup>, Rita M. C. de Almeida\*<sup>†2</sup>,

and José C. F. Moreira<sup>1</sup>

\*These authors contributed equally to this work.

<sup>†</sup>To whom correspondence should be addressed. E-mail: mauro@ufrgs.br; rita@if.ufrgs.br

**This PDF file includes:**

Supplementary Methods

Supplementary Figures S1 to S10

Supplementary Tables S1 to S16

Supplementary References

## Supplementary Methods

### Analysis of SAGE libraries

To illustrate the mathematical definitions used for the analysis presented in the text, consider two hypothetical SAGE libraries (with a set of ten SAGE tags), as presented in **Figure S1**. If a tag is randomly selected, the probability distribution describes the probability  $p(i, \alpha)$  that the observed tag will be of a particular type  $i$ . The quantity  $H_\alpha$  indicates how diverse a distribution is, giving an estimate of diversity observed in the distribution of tags. In this case, the distribution **(B)** is more heterogeneous compared to distribution **(A)**, since in **(B)** the tags are equally dispersed, while in **(A)** the tags are more concentrated in two types. The distribution **(B)** shows the highest possible diversity value, with  $H_\alpha = 1.0$ . Therefore, an increase in heterogeneity of some SAGE library implies higher  $H_\alpha$ , indicating higher diversity. Having **(A)** as reference for normal condition, the relative increase of diversity in **(B)** is expressed by the term  $h_\alpha = 0.595$ . Since both distributions have the activity (*e.g.*  $N_\alpha^c = N_\alpha^r = 30.0$ ), the normalized number of SAGE tags is  $n_\alpha = 0.50$ . In addition, we present another example in **Figure S2** where the normalization condition gives the same  $h_\alpha$  regardless the different numbers of SAGE tags in the libraries.

Figure S1

(A)

| Tag            | Frequency<br>$s(i,\alpha)$ | $p(i,\alpha)$ | $p(i,\alpha).\ln p(i,\alpha)$ |
|----------------|----------------------------|---------------|-------------------------------|
| 1. CAGATCCAAA  | 1                          | 0.03          | -0.11                         |
| 2. CAGATCCCCA  | 1                          | 0.03          | -0.11                         |
| 3. CAGATCGGAT  | 1                          | 0.03          | -0.11                         |
| 4. CAGATCTATT  | 6                          | 0.20          | -0.32                         |
| 5. CAGATCTTTG  | 1                          | 0.03          | -0.11                         |
| 6. CAGATCTTTT  | 1                          | 0.03          | -0.11                         |
| 7. CAGATGAATA  | 1                          | 0.03          | -0.11                         |
| 8. CAGATGAATG  | 16                         | 0.53          | -0.34                         |
| 9. CAGATGAGAA  | 1                          | 0.03          | -0.11                         |
| 10. CAGATGCAAA | 1                          | 0.03          | -0.11                         |
| $\Sigma$       | 30                         | 1.00          | -1.56                         |

(B)

| Tag            | Frequency<br>$s(i,\alpha)$ | $p(i,\alpha)$ | $p(i,\alpha).\ln p(i,\alpha)$ |
|----------------|----------------------------|---------------|-------------------------------|
| 1. CAGATCCAAA  | 3                          | 0.10          | -0.23                         |
| 2. CAGATCCCCA  | 3                          | 0.10          | -0.23                         |
| 3. CAGATCGGAT  | 3                          | 0.10          | -0.23                         |
| 4. CAGATCTATT  | 3                          | 0.10          | -0.23                         |
| 5. CAGATCTTTG  | 3                          | 0.10          | -0.23                         |
| 6. CAGATCTTTT  | 3                          | 0.10          | -0.23                         |
| 7. CAGATGAATA  | 3                          | 0.10          | -0.23                         |
| 8. CAGATGAATG  | 3                          | 0.10          | -0.23                         |
| 9. CAGATGAGAA  | 3                          | 0.10          | -0.23                         |
| 10. CAGATGCAAA | 3                          | 0.10          | -0.23                         |
| $\Sigma$       | 30                         | 1.00          | -2.30                         |

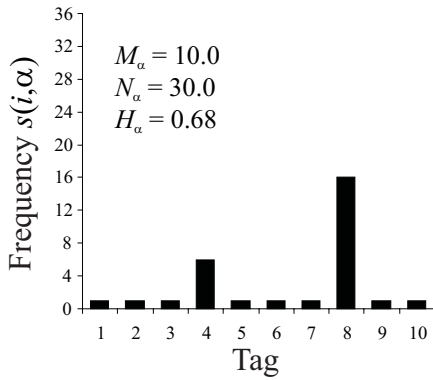

$$h_\alpha = 0.595$$

$$n_\alpha = 0.500$$

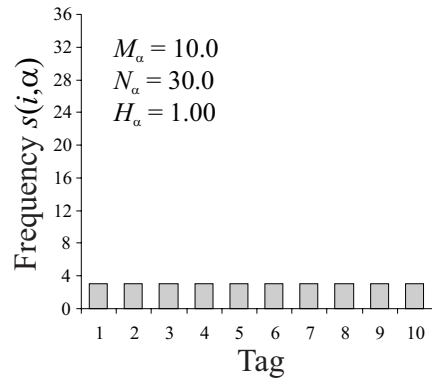

**Figure S1.** Illustrative distributions of SAGE tags for two hypothetical libraries. Each table presents thirty SAGE tags ( $N_\alpha = 30.0$ ) with ten possible different SAGE tags ( $M_\alpha = 10.0$ ). For a given SAGE library  $\alpha$ ,  $s(i,\alpha)$  is the number of tags of type  $i$ ;  $p(i,\alpha)$  is the normalized probability function (e.g. the probability that among all tags we randomly choose one that is of type  $i$ ). Below each table the histogram of  $s(i,\alpha)$  is presented and the resulting  $h_\alpha$  and  $n_\alpha$  are obtained by eq.(3) and eq.(4), respectively. **(A)** When SAGE tags distribution are concentrated between two possibilities. **(B)** When SAGE tags are equally distributed among all possibilities.

Figure S2

(A)

| Tag            | Frequency<br>$s(i,\alpha)$ | $p(i,\alpha)$ | $p(i,\alpha).\ln p(i,\alpha)$ |
|----------------|----------------------------|---------------|-------------------------------|
| 1. CAGATCCAAA  | 2                          | 0.03          | -0.11                         |
| 2. CAGATCCCCA  | 2                          | 0.03          | -0.11                         |
| 3. CAGATCGGAT  | 2                          | 0.03          | -0.11                         |
| 4. CAGATCTATT  | 12                         | 0.20          | -0.32                         |
| 5. CAGATCTTTG  | 2                          | 0.03          | -0.11                         |
| 6. CAGATCTTTT  | 2                          | 0.03          | -0.11                         |
| 7. CAGATGAATA  | 2                          | 0.03          | -0.11                         |
| 8. CAGATGAATG  | 32                         | 0.53          | -0.34                         |
| 9. CAGATGAGAA  | 2                          | 0.03          | -0.11                         |
| 10. CAGATGCAAA | 2                          | 0.03          | -0.11                         |
| $\Sigma$       | 60                         | 1.00          | -1.56                         |

(B)

| Tag            | Frequency<br>$s(i,\alpha)$ | $p(i,\alpha)$ | $p(i,\alpha).\ln p(i,\alpha)$ |
|----------------|----------------------------|---------------|-------------------------------|
| 1. CAGATCCAAA  | 1                          | 0.10          | -0.23                         |
| 2. CAGATCCCCA  | 1                          | 0.10          | -0.23                         |
| 3. CAGATCGGAT  | 1                          | 0.10          | -0.23                         |
| 4. CAGATCTATT  | 1                          | 0.10          | -0.23                         |
| 5. CAGATCTTTG  | 1                          | 0.10          | -0.23                         |
| 6. CAGATCTTTT  | 1                          | 0.10          | -0.23                         |
| 7. CAGATGAATA  | 1                          | 0.10          | -0.23                         |
| 8. CAGATGAATG  | 1                          | 0.10          | -0.23                         |
| 9. CAGATGAGAA  | 1                          | 0.10          | -0.23                         |
| 10. CAGATGCAAA | 1                          | 0.10          | -0.23                         |
| $\Sigma$       | 10                         | 1.00          | -2.30                         |

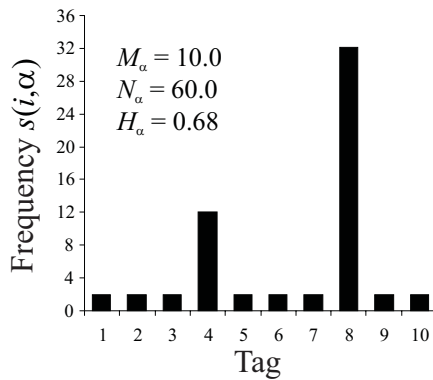

$$h_\alpha = 0.595$$

$$n_\alpha = 0.143$$

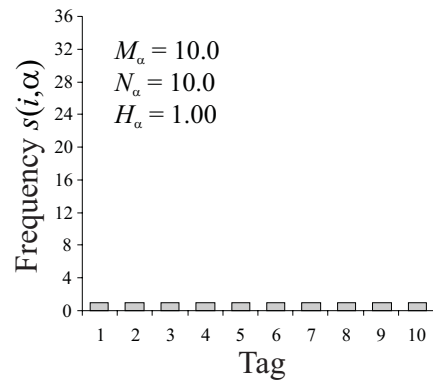

**Figure S2.** Illustrative distributions of SAGE libraries for different number of SAGE tags. Data table presenting different number of tags, but with the same ten possible SAGE tags ( $M_\alpha = 10.0$ ) as illustrated in **Figure S1**. **(A)** When SAGE tags distribution are concentrated between two possibilities. **(B)** When SAGE tags are equally distributed among all possibilities.

Figure S3

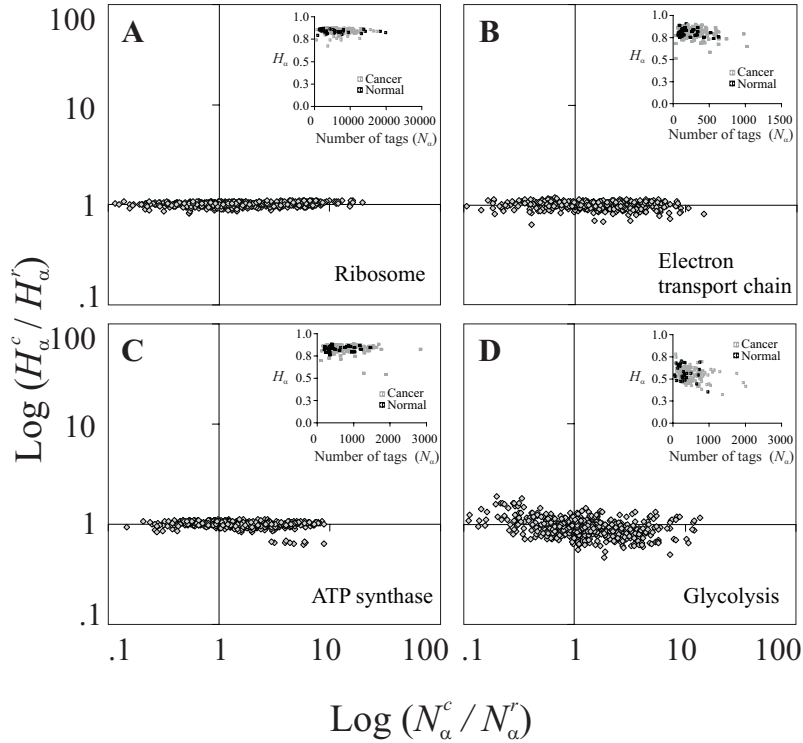

**Figure S3.** Diversity of gene expression pathways involved in core cell functions. Log-log scatter plots showing the ratio of cancer and normal tissue diversity ( $H_\alpha^c / H_\alpha^r$ ) as a function of the corresponding number of SAGE tags (ratio  $N_\alpha^c / N_\alpha^r$ ). The plots for absolute values of  $H_\alpha$  as a function of  $N_\alpha$  are shown in the inserts. The groups of genes that form each pathway are presented in **Tables S5 to S8** and were defined accordingly to Kyoto Encyclopedia of Genes and Genomes (KEGG) pathways (1): (A) Ribosome pathway, as described in *Ribosome - Homo sapiens (human)*; (B) Electron transport chain (ETC) pathway, derived from *Oxidative phosphorylation - Homo sapiens (human)*; (C) ATP synthase pathway, derived from *Oxidative phosphorylation - Homo sapiens (human)*; (D) Glycolysis pathway, derived from *Glycolysis / Gluconeogenesis - Homo sapiens (human)*.

Figure S4

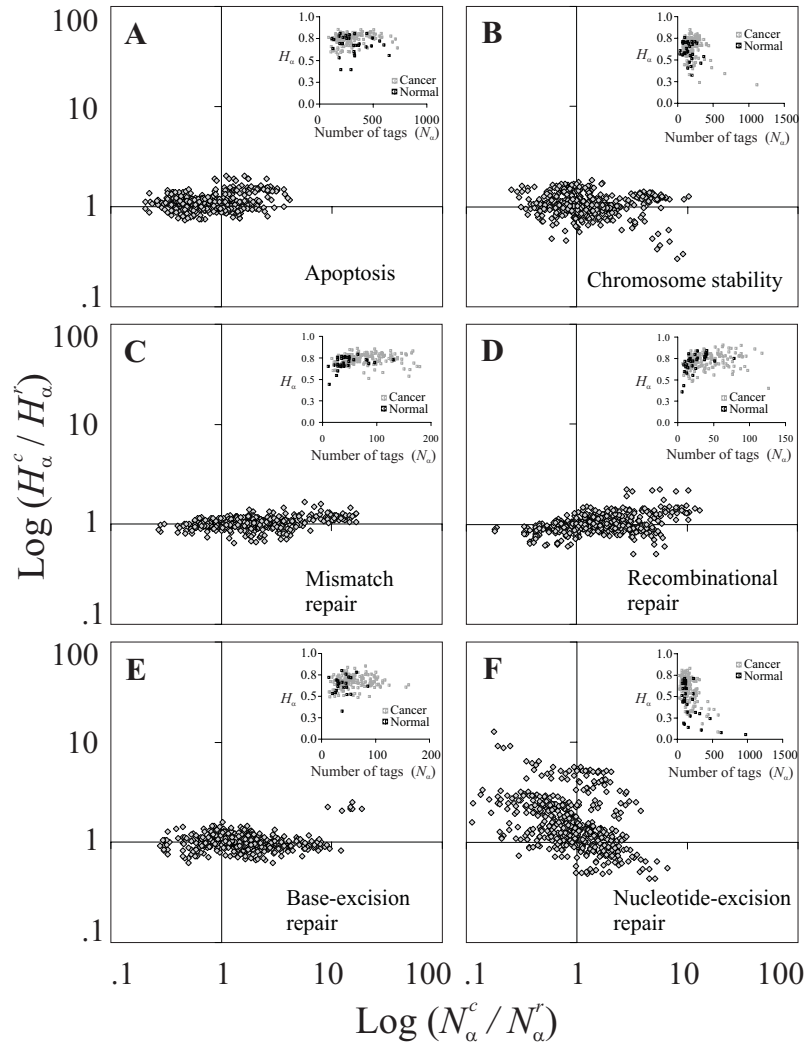

**Figure S4.** Diversity of gene expression pathways involved in genomic stability. Log-log scatter plots showing the ratio of cancer and normal tissue diversity ( $H_\alpha^c / H_\alpha^r$ ) as a function of the corresponding number of SAGE tags (ratio  $N_\alpha^c / N_\alpha^r$ ). The plots for absolute values of diversity  $H_\alpha$  as a function of number  $N_\alpha$  of SAGE tags are shown in the inserts. The groups of genes that form each pathway are presented in **Tables S9 to S14** and were defined accordingly to several references: **(A)** Apoptosis pathway, as described in *Apoptosis - Homo sapiens (human)* KEGG pathway (1); **(B)** Chromosome stability pathway, derived from compilation of genes that may trigger chromosome instability when mutated, accordingly to Wang et al. (2); **(C)** Mismatch repair (MMR) pathway, compilation of genes constructed accordingly to Wood et al. (3) and Jiricny (4); **(D)** Recombinational repair (RER) pathway, **(E)** Base-excision repair (BER) pathway, and **(F)** Nucleotide-excision repair (NER) pathway, compilations of genes accordingly to Wood et al. (3).

Figure S5

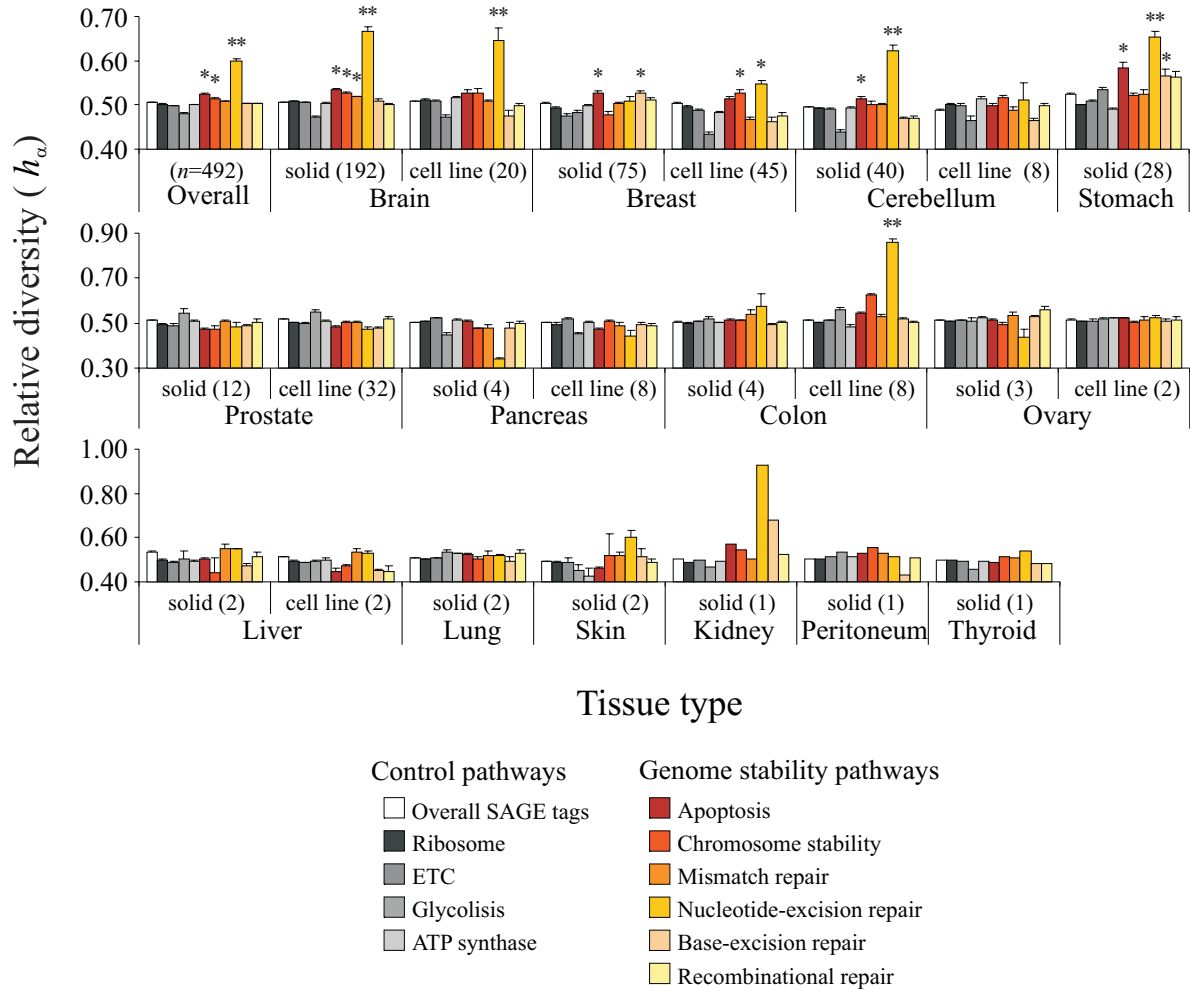

**Figure S5.** Stochastic contrasts among gene expression pathways according to diversity of SAGE tags. Statistical analyses are carried out by Kruskal-Wallis one-way analysis of variance followed by Mann-Whitney test for comparisons. \*Different from controls with  $P < 0.02$ ; \*\*Different from others with  $P < 0.001$ .

Figure S6

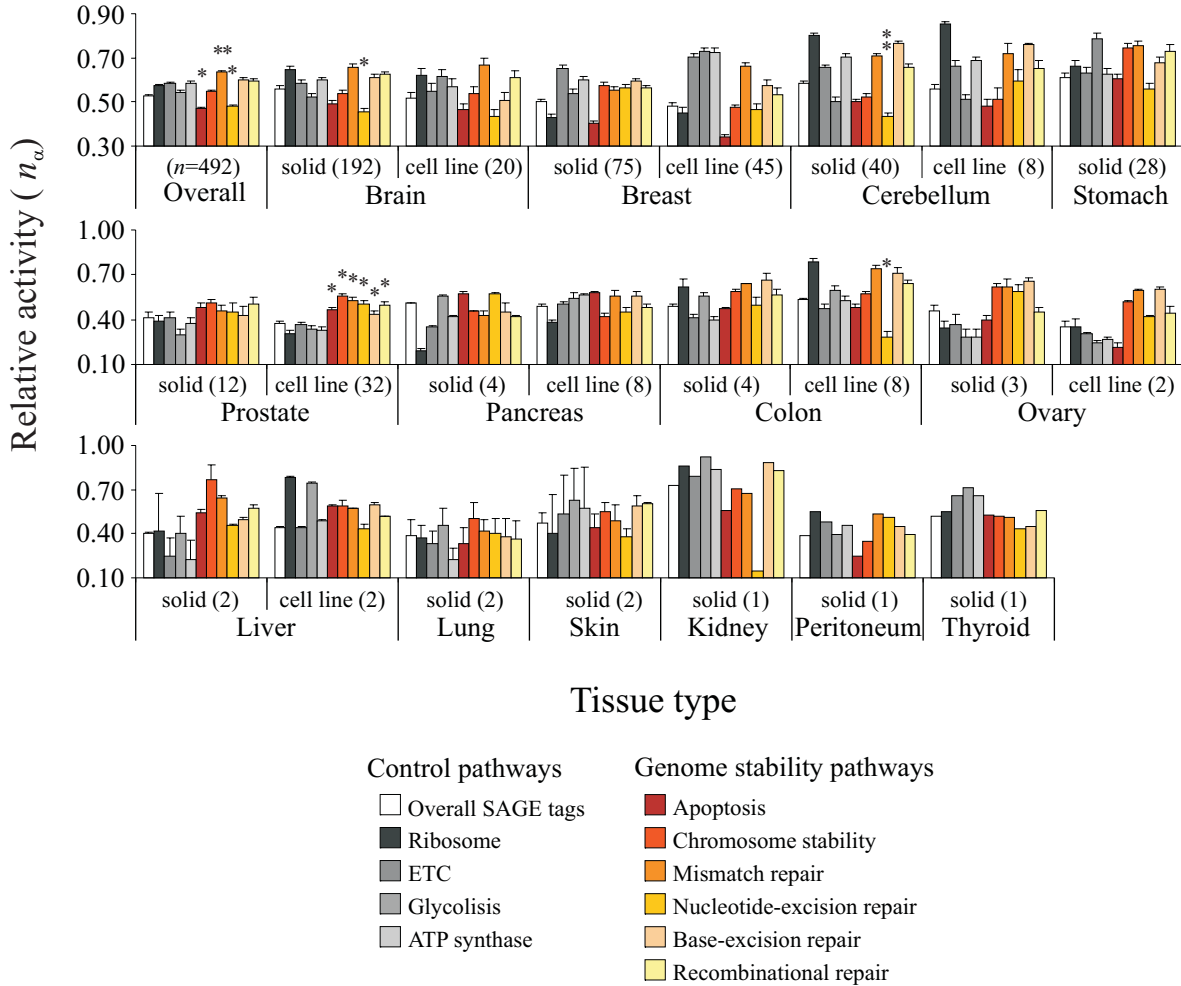

**Figure S6.** Stochastic contrasts among gene expression pathways according to number of SAGE tags. Statistical analyses are carried out by Kruskal-Wallis one-way analysis of variance followed by Mann-Whitney test for comparisons.\*Different from controls with  $P < 0.04$ ; \*\*different from others with  $P < 0.04$ .



Figure S7

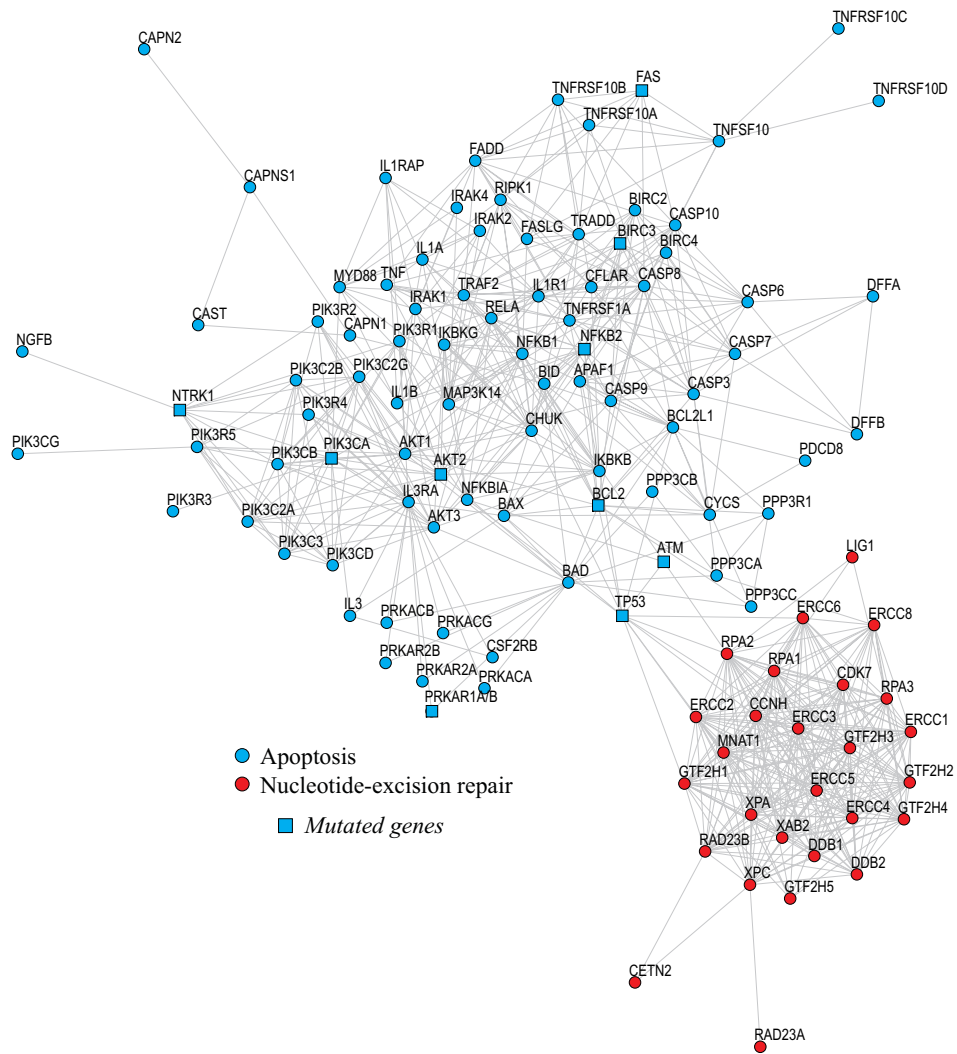

**Figure S7.** Graph of interactions among genes involved only in apoptosis and NER pathways. The graph is generated using database STRING (5). Different pathways are represented by different colors. Square nodes represent genes whose somatic mutations have been causally implicated in oncogenesis (6).

Figure S8

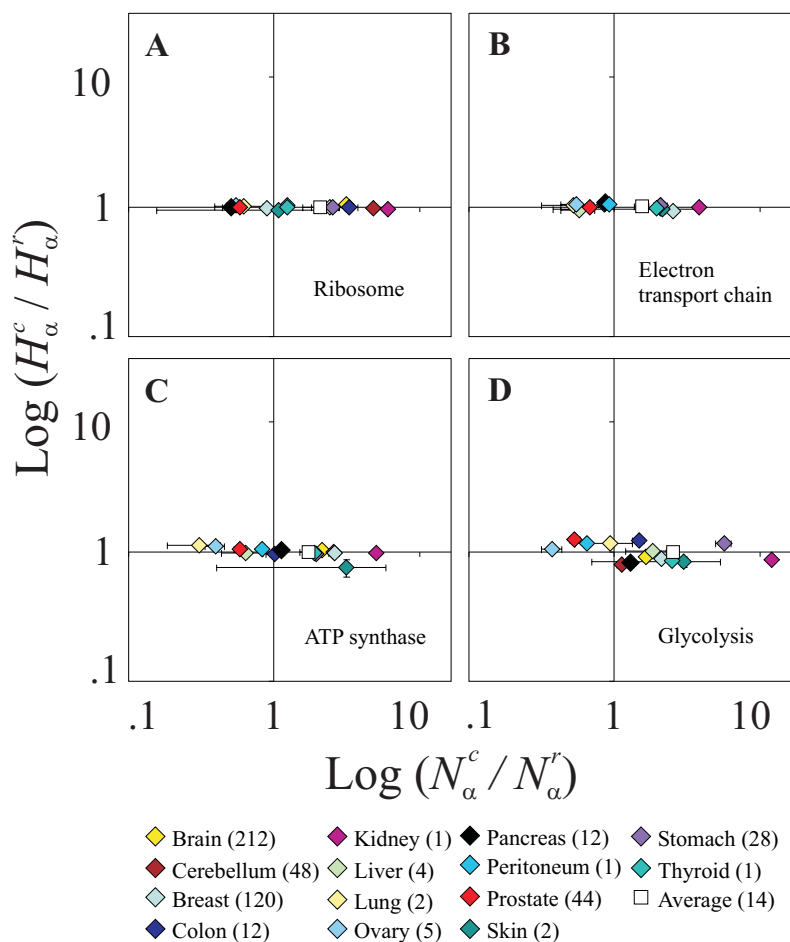

**Figure S8.** Average diversity of gene expression pathways involved in core cell functions. Log-log scatter plots showing average diversity of the ratio  $H_\alpha^c / H_\alpha^r$  by tissue type as a function of the corresponding number of SAGE tags (ratio  $N_\alpha^c / N_\alpha^r$ ). The groups of genes that form each pathway are presented in **Tables S5 to S8** and were defined as in **Figure S3**. The number of matched pairs of each tissue type is showed in the legend. Error bars: SEM of pairwise ratio  $H_\alpha^c / H_\alpha^r$  of each specific tissue type.

Figure S9

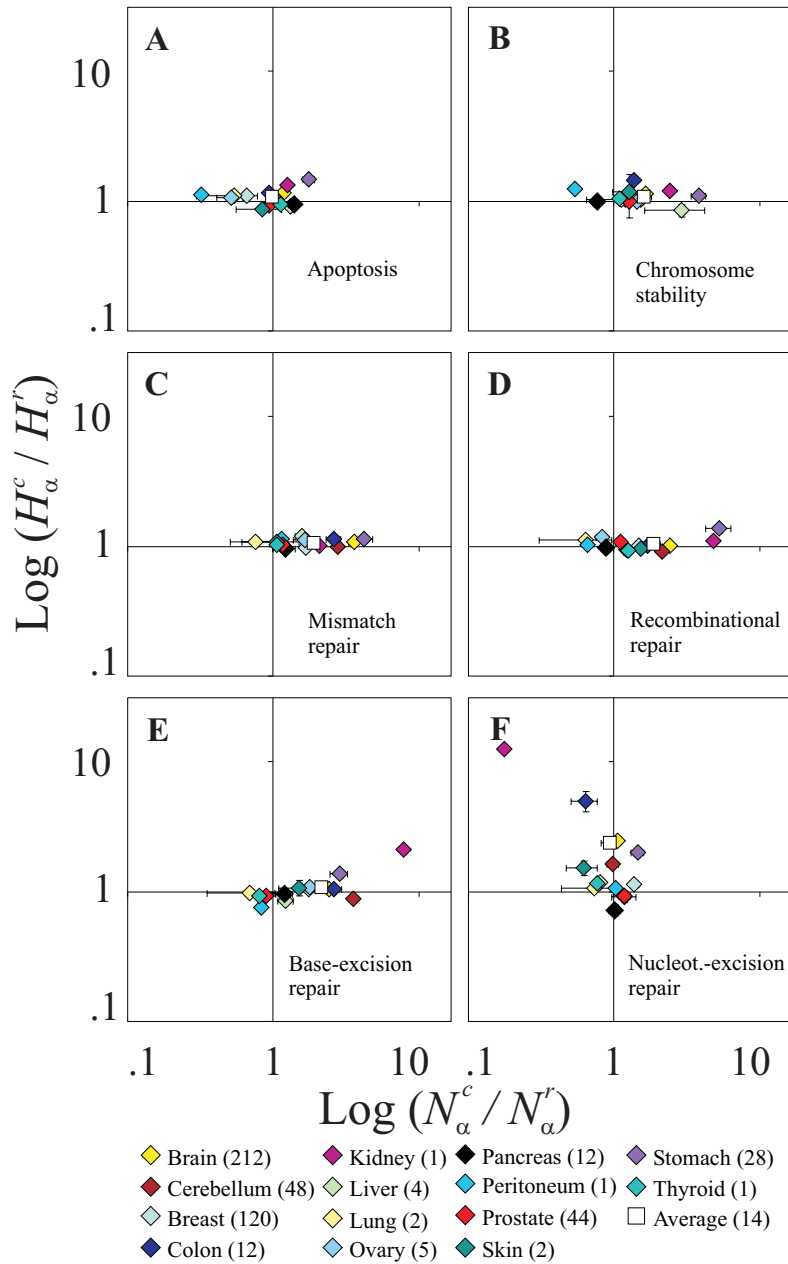

**Figure S9.** Average diversity of gene expression pathways involved in genomic stability.

Log-log scatter plots showing average diversity of the ratio  $H_\alpha^c / H_\alpha^r$  by tissue type as a function of the corresponding number of SAGE tags (ratio  $N_\alpha^c / N_\alpha^r$ ). The groups of genes that form each pathway are presented in **Tables S9 to S14** and were defined as in **Figure S4**. The number of matched pairs of each tissue type is showed in the legend. Error bars: SEM of pairwise ratio  $H_\alpha^c / H_\alpha^r$  of each specific tissue type.

Figure S10

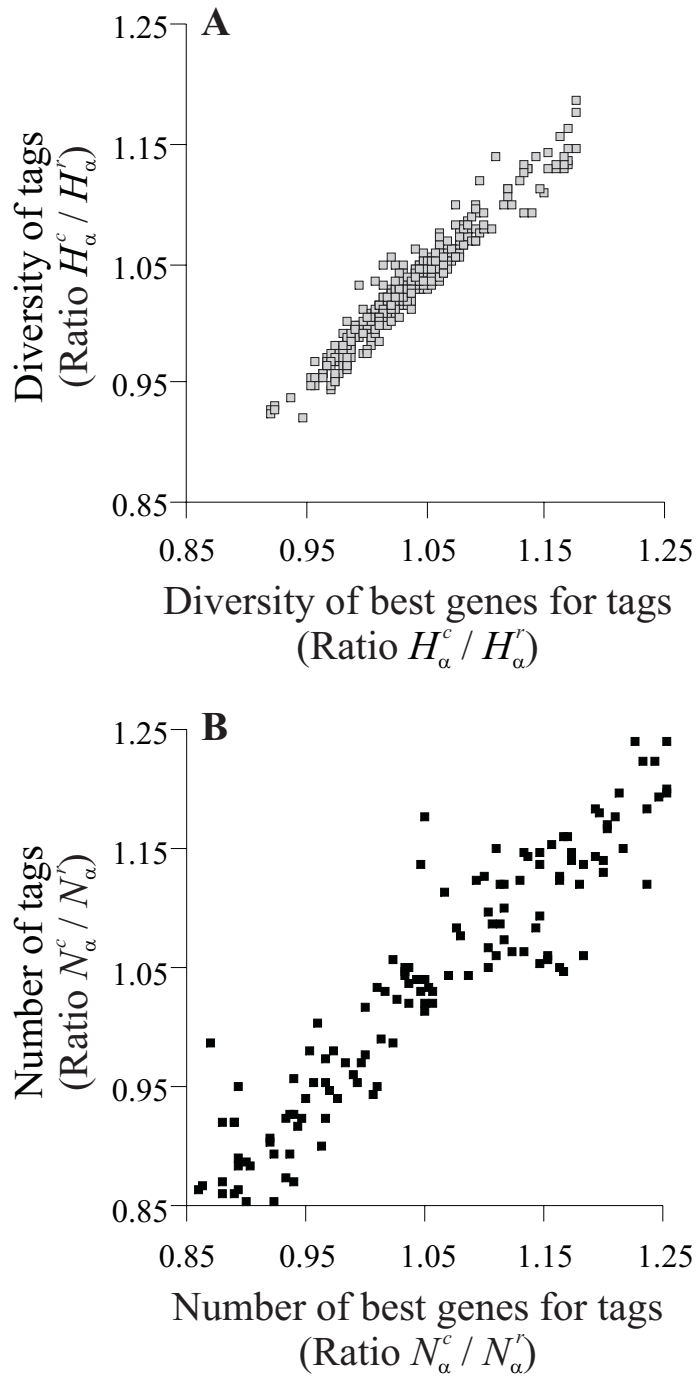

**Figure S10.** Correlation between SAGE tag and SAGE tag-to-gene databases. **(A)** Diversity of tags as a function of best genes for tags (ratio  $H_\alpha^c / H_\alpha^r$ ). **(B)** Number of tags as a function of best genes for tags (ratio  $N_\alpha^c / N_\alpha^r$ ).

## Supplementary tables

**Table S1.** Diversity of normal tissue SAGE libraries.

| Library Title <sup>a</sup>                   | Tissue       | Preparation | $H_\alpha$ <sup>b</sup> | $M_\alpha$ <sup>c</sup> | $N_\alpha$ <sup>d</sup> |  |
|----------------------------------------------|--------------|-------------|-------------------------|-------------------------|-------------------------|--|
| SAGE_Brain_normal_cerebellum_B_1             | cerebellum   | bulk        | 0.909                   | 24357                   | 50385                   |  |
| SAGE_Brain_normal_cerebellum_B_BB542         | cerebellum   | bulk        | 0.906                   | 19163                   | 40500                   |  |
| SAGE_Breast_normal_myoepithelium_AP_myoep.1  | breast       | ABP         | 0.905                   | 26342                   | 57222                   |  |
| SAGE_Peritoneum_normal_B_13                  | peritoneum   | bulk        | 0.896                   | 22799                   | 53527                   |  |
| SAGE_Skin_normal_B_NS                        | skin         | bulk        | 0.892                   | 15246                   | 36615                   |  |
| SAGE_Breast_normal_epithelium_AP_1           | breast       | ABP         | 0.880                   | 18276                   | 48729                   |  |
| SAGE_Pancreas_normal_CS_HX                   | pancreas     | STC         | 0.877                   | 12392                   | 31985                   |  |
| SAGE_Pancreas_normal_CS_H126                 | pancreas     | STC         | 0.877                   | 12360                   | 32223                   |  |
| SAGE_Brain_normal_peds_cortex_B_H1571        | brain        | bulk        | 0.874                   | 24161                   | 77554                   |  |
| SAGE_Breast_normal_epithelium_AP_Br_N        | breast       | ABP         | 0.866                   | 19190                   | 50512                   |  |
| SAGE_Prostate_normal_MD_PR317                | prostate     | MCD         | 0.865                   | 18732                   | 59277                   |  |
| SAGE_Brain_normal_leptomeninges_B_AL2        | brain        | bulk        | 0.864                   | 26220                   | 72473                   |  |
| SAGE_Thyroid_normal_B_001                    | thyroid      | bulk        | 0.863                   | 35845                   | 115938                  |  |
| SAGE_Ovary_normal_CS_HOSE_4                  | ovary        | STC         | 0.861                   | 15994                   | 47728                   |  |
| SAGE_Brain_normal_cortex_B_BB542             | brain        | bulk        | 0.861                   | 31683                   | 94233                   |  |
| SAGE_Breast_normal_organoid_B                | breast       | bulk        | 0.860                   | 19602                   | 58181                   |  |
| SAGE_Prostate_normal_B_2                     | prostate     | bulk        | 0.855                   | 20456                   | 64058                   |  |
| SAGE_Lung_normal_B_1                         | lung         | bulk        | 0.852                   | 24764                   | 88708                   |  |
| SAGE_Stomach_normal_B_antrum                 | stomach      | bulk        | 0.848                   | 9349                    | 26653                   |  |
| SAGE_Colon_normal_B_NC1                      | colon        | bulk        | 0.847                   | 17703                   | 49610                   |  |
| SAGE_Brain_normal_thalamus_B_1               | brain        | bulk        | 0.847                   | 10115                   | 24015                   |  |
| SAGE_Colon_normal_B_NC2                      | colon        | bulk        | 0.846                   | 16270                   | 48479                   |  |
| SAGE_Kidney_normal_B_1                       | kidney       | bulk        | 0.844                   | 16295                   | 40993                   |  |
| SAGE_Breast_normal_stroma_AP_1               | breast       | ABP         | 0.825                   | 23409                   | 79152                   |  |
| SAGE_Stomach_normal_MD_14S                   | stomach      | MCD         | 0.819                   | 18718                   | 73353                   |  |
| SAGE_Prostate_normal_epithelium_CS_senescent | prostate     | STC         | 0.800                   | 16963                   | 71717                   |  |
| SAGE_Liver_normal_B_1                        | liver        | bulk        | 0.792                   | 15496                   | 66308                   |  |
| SAGE_Prostate_normal_epithelium_CS_confluent | prostate     | STC         | 0.786                   | 15164                   | 71897                   |  |
| SAGE_Stomach_normal_MD_13S                   | gastr. tract | MCD         | 0.785                   | 15700                   | 45908                   |  |
| SAGE_Stomach_normal_epithelium_B_body1       | stomach      | bulk        | 0.783                   | 8907                    | 24761                   |  |

<sup>a</sup> Normal SAGE libraries retrieved based on the search criteria: tag length (short 10bp); tissue preparation [bulk, short term culture (STC), antibody purified (ABP) or microscope dissected (MCD)]; and tissue histology (normal). The list contains only normal libraries that have at least one cancer equivalent tissue library, matching the search criteria. One normal library (SAGE\_Brain\_normal\_cortex\_B\_pool6) was not included because is derived from pooled samples.

<sup>b</sup> Diversity (color code indicates de  $H_\alpha$  level); <sup>c</sup> Number of unique tags; <sup>d</sup> Number of tags.

| Color code |        |        |        |        |        |        |        |        |        |              |
|------------|--------|--------|--------|--------|--------|--------|--------|--------|--------|--------------|
| $H_\alpha$ | <0.860 | <0.865 | <0.870 | <0.875 | <0.880 | <0.885 | <0.890 | <0.895 | <0.900 | $\geq 0.900$ |

**Table S2.** Diversity of brain cancer SAGE libraries.

| Library Title <sup>a</sup>               | Tissue | Preparation | $H_{\alpha}$ <sup>b</sup> | $M_{\alpha}$ <sup>c</sup> | $N_{\alpha}$ <sup>d</sup> |  |
|------------------------------------------|--------|-------------|---------------------------|---------------------------|---------------------------|--|
| SAGE_Brain_astrocytoma_grade_III_B_H1020 | brain  | bulk        | 0.926                     | 30738                     | 51573                     |  |
| SAGE_Brain_ependymoblastoma_B_819        | brain  | bulk        | 0.914                     | 14845                     | 33975                     |  |
| SAGE_Brain_ependymoma_B_1150             | brain  | bulk        | 0.910                     | 23324                     | 62373                     |  |
| SAGE_Brain_glioblastoma_CS_TA2           | brain  | STC         | 0.910                     | 21568                     | 46678                     |  |
| SAGE_Brain_ependymoma_B_239              | brain  | bulk        | 0.908                     | 20459                     | 46653                     |  |
| SAGE_Brain_oligodendroglioma_B_H988      | brain  | bulk        | 0.905                     | 13982                     | 27864                     |  |
| SAGE_Brain_glioblastoma_B_pooled         | brain  | bulk        | 0.902                     | 24020                     | 56428                     |  |
| SAGE_Brain_glioblastoma_B_H1371          | brain  | bulk        | 0.901                     | 22909                     | 49338                     |  |
| SAGE_Brain_ependymoma_B_R353             | brain  | bulk        | 0.900                     | 27211                     | 73822                     |  |
| SAGE_Brain_ependymoma_B_H580             | brain  | bulk        | 0.900                     | 25883                     | 68614                     |  |
| SAGE_Brain_ependymoma_B_R455             | brain  | bulk        | 0.898                     | 19611                     | 51825                     |  |
| SAGE_Brain_ependymoma_B_R510             | brain  | bulk        | 0.897                     | 30595                     | 84073                     |  |
| SAGE_Brain_ependymoma_B_1394             | brain  | bulk        | 0.896                     | 22956                     | 56314                     |  |
| SAGE_Brain_astrocytoma_grade_I_B_H1043   | brain  | bulk        | 0.894                     | 30880                     | 75922                     |  |
| SAGE_Brain_oligodendroglioma_B_1001      | brain  | bulk        | 0.891                     | 14369                     | 32442                     |  |
| SAGE_Brain_astrocytoma_grade_II_B_H516   | brain  | bulk        | 0.891                     | 42250                     | 108116                    |  |
| SAGE_Brain_glioblastoma_B_H1110          | brain  | bulk        | 0.891                     | 25812                     | 68986                     |  |
| SAGE_Brain_glioblastoma_B_R20            | brain  | bulk        | 0.887                     | 35474                     | 101053                    |  |
| SAGE_Brain_ependymoma_B_R1023            | brain  | bulk        | 0.884                     | 40027                     | 122690                    |  |
| SAGE_Brain_ependymoma_B_R512             | brain  | bulk        | 0.883                     | 27374                     | 75379                     |  |
| SAGE_Brain_astrocytoma_grade_II_B_H530   | brain  | bulk        | 0.881                     | 34715                     | 102439                    |  |
| SAGE_Brain_astrocytoma_grade_III_B_H272  | brain  | bulk        | 0.880                     | 34171                     | 96059                     |  |
| SAGE_Brain_astrocytoma_grade_II_B_H563   | brain  | bulk        | 0.880                     | 30054                     | 88568                     |  |
| SAGE_Brain_astrocytoma_grade_III_B_H970  | brain  | bulk        | 0.880                     | 35207                     | 106982                    |  |
| SAGE_Brain_astrocytoma_grade_III_B_828   | brain  | bulk        | 0.879                     | 32109                     | 99939                     |  |
| SAGE_Brain_glioblastoma_B_R336           | brain  | bulk        | 0.878                     | 34762                     | 102322                    |  |
| SAGE_Brain_astrocytoma_grade_III_B_R140  | brain  | bulk        | 0.878                     | 36465                     | 118733                    |  |
| SAGE_Brain_astrocytoma_grade_III_B_H1055 | brain  | bulk        | 0.878                     | 37250                     | 109886                    |  |
| SAGE_Brain_astrocytoma_grade_III_B_R927  | brain  | bulk        | 0.877                     | 33747                     | 107344                    |  |
| SAGE_Brain_astrocytoma_grade_II_B_H359   | brain  | bulk        | 0.877                     | 35555                     | 105764                    |  |
| SAGE_Brain_ependymoma_B_R628             | brain  | bulk        | 0.875                     | 39836                     | 120431                    |  |
| SAGE_Brain_glioblastoma_B_H1353          | brain  | bulk        | 0.875                     | 37773                     | 124805                    |  |
| SAGE_Brain_glioblastoma_B_H1425C         | brain  | bulk        | 0.874                     | 28204                     | 88990                     |  |
| SAGE_Brain_meningioma_grade_II_B_SF3622  | brain  | bulk        | 0.872                     | 16264                     | 44857                     |  |
| SAGE_Brain_ependymoma_B_R582             | brain  | bulk        | 0.871                     | 17282                     | 52189                     |  |
| SAGE_Brain_astrocytoma_grade_II_B_H501   | brain  | bulk        | 0.871                     | 38047                     | 128309                    |  |
| SAGE_Brain_glioblastoma_B_H833           | brain  | bulk        | 0.870                     | 34143                     | 100600                    |  |
| SAGE_Brain_meningioma_grade_III_B_SF2366 | brain  | bulk        | 0.867                     | 20161                     | 59786                     |  |
| SAGE_Brain_astrocytoma_grade_II_B_H388   | brain  | bulk        | 0.864                     | 34081                     | 106285                    |  |
| SAGE_Brain_meningioma_grade_II_B_SF2176  | brain  | bulk        | 0.864                     | 16920                     | 48711                     |  |
| SAGE_Brain_astrocytoma_grade_III_B_407   | brain  | bulk        | 0.863                     | 32819                     | 108312                    |  |
| SAGE_Brain_glioblastoma_B_R70            | brain  | bulk        | 0.863                     | 32108                     | 99099                     |  |
| SAGE_Brain_astrocytoma_grade_II_B_H518   | brain  | bulk        | 0.863                     | 36310                     | 116022                    |  |
| SAGE_Brain_astrocytoma_grade_III_B_439   | brain  | bulk        | 0.861                     | 34620                     | 107824                    |  |
| SAGE_Brain_astrocytoma_grade_III_B_343   | brain  | bulk        | 0.858                     | 29620                     | 100158                    |  |
| SAGE_Brain_astrocytoma_grade_III_B_584   | brain  | bulk        | 0.858                     | 30772                     | 103008                    |  |
| SAGE_Brain_astrocytoma_grade_II_B_H127   | brain  | bulk        | 0.844                     | 31165                     | 114489                    |  |
| SAGE_Brain_glioblastoma_B_GBM1062        | brain  | bulk        | 0.820                     | 15504                     | 59762                     |  |

**Table S2 (Continued).**

| Library Title <sup>a</sup>              | Tissue     | Preparation | $H_{\alpha}$ <sup>b</sup> | $M_{\alpha}$ <sup>c</sup> | $N_{\alpha}$ <sup>d</sup> |  |
|-----------------------------------------|------------|-------------|---------------------------|---------------------------|---------------------------|--|
| SAGE_Brain_medulloblastoma_B_H1322      | cerebellum | bulk        | 0.928                     | 28969                     | 59498                     |  |
| SAGE_Brain_medulloblastoma_B_98-05-P608 | cerebellum | bulk        | 0.921                     | 22675                     | 48451                     |  |
| SAGE_Brain_medulloblastoma_B_C609       | cerebellum | bulk        | 0.914                     | 32456                     | 74612                     |  |
| SAGE_Brain_medulloblastoma_B_1273       | cerebellum | bulk        | 0.905                     | 17236                     | 38614                     |  |
| SAGE_Brain_medulloblastoma_B_H484       | cerebellum | bulk        | 0.904                     | 25712                     | 57469                     |  |
| SAGE_Brain_medulloblastoma_B_98-09-P558 | cerebellum | bulk        | 0.903                     | 33598                     | 85984                     |  |
| SAGE_Brain_medulloblastoma_B_96-04-P019 | cerebellum | bulk        | 0.903                     | 22017                     | 52645                     |  |
| SAGE_Brain_medulloblastoma_B_98-13-P301 | cerebellum | bulk        | 0.897                     | 17313                     | 45342                     |  |
| SAGE_Brain_medulloblastoma_B_98-04-P117 | cerebellum | bulk        | 0.893                     | 14766                     | 32570                     |  |
| SAGE_Brain_medulloblastoma_B_98-05-P040 | cerebellum | bulk        | 0.889                     | 34995                     | 89258                     |  |
| SAGE_Brain_medulloblastoma_B_H972       | cerebellum | bulk        | 0.886                     | 30675                     | 85376                     |  |
| SAGE_Brain_medulloblastoma_B_98-04-P494 | cerebellum | bulk        | 0.884                     | 16247                     | 43068                     |  |
| SAGE_Brain_medulloblastoma_B_H306       | cerebellum | bulk        | 0.883                     | 24714                     | 60454                     |  |
| SAGE_Brain_medulloblastoma_B_DL7        | cerebellum | bulk        | 0.883                     | 25370                     | 68392                     |  |
| SAGE_Brain_medulloblastoma_B_97-05-P312 | cerebellum | bulk        | 0.881                     | 28029                     | 74295                     |  |
| SAGE_Brain_medulloblastoma_B_H275       | cerebellum | bulk        | 0.877                     | 26151                     | 72318                     |  |
| SAGE_Brain_medulloblastoma_B_H876       | cerebellum | bulk        | 0.876                     | 25648                     | 67404                     |  |
| SAGE_Brain_medulloblastoma_B_97-05-P015 | cerebellum | bulk        | 0.868                     | 24631                     | 69971                     |  |
| SAGE_Brain_medulloblastoma_B_DL5        | cerebellum | bulk        | 0.868                     | 28721                     | 83671                     |  |
| SAGE_Brain_medulloblastoma_B_H1413      | cerebellum | bulk        | 0.842                     | 22833                     | 61853                     |  |

<sup>a</sup> Brain cancer SAGE libraries retrieved based on the search criteria: tag length (short 10bp); tissue preparation [bulk, short term culture (STC), antibody purified (ABP) or microscope dissected (MCD)]; and tissue histology (cancer). The list contains only cancer libraries that have at least one normal equivalent tissue library, matching the search criteria. Cerebellum tissue libraries are retrieved by specific access in CGAP search tools and, therefore, are listed separately from brain tissue.

<sup>b</sup> Diversity (color code indicates de  $H_{\alpha}$  level); <sup>c</sup> Number of unique tags; <sup>d</sup> Number of tags.

| Color code   |        |        |        |        |        |        |        |        |        |              |
|--------------|--------|--------|--------|--------|--------|--------|--------|--------|--------|--------------|
| $H_{\alpha}$ | <0.860 | <0.865 | <0.870 | <0.875 | <0.880 | <0.885 | <0.890 | <0.895 | <0.900 | $\geq 0.900$ |

**Table S3.** Diversity of epithelial cancer SAGE libraries.

| Library Title <sup>a</sup>                 | Tissue     | Preparation | $H_\alpha$ <sup>b</sup> | $M_\alpha$ <sup>c</sup> | $N_\alpha$ <sup>d</sup> |  |
|--------------------------------------------|------------|-------------|-------------------------|-------------------------|-------------------------|--|
| SAGE_Liver_cholangiocarcinoma_B_K1         | liver      | bulk        | 0.940                   | 40476                   | 60319                   |  |
| SAGE_Skin_melanoma_B_DB3                   | skin       | bulk        | 0.928                   | 6267                    | 11399                   |  |
| SAGE_Ovary_adenocarcinoma_B_OVT-8          | ovary      | bulk        | 0.925                   | 16312                   | 31987                   |  |
| SAGE_Peritoneum_mesothelioma_B_12          | peritoneum | bulk        | 0.906                   | 14103                   | 32529                   |  |
| SAGE_Ovary_adenocarcinoma_B_OVT-6          | ovary      | bulk        | 0.905                   | 18440                   | 41443                   |  |
| SAGE_Stomach_adenocarcinoma_MD_G329        | stomach    | MCD         | 0.898                   | 19208                   | 46802                   |  |
| SAGE_Pancreas_adenocarcinoma_B_91-16113    | pancreas   | bulk        | 0.895                   | 15793                   | 33582                   |  |
| SAGE_Prostate_carcinoma_B_LN-1             | prostate   | bulk        | 0.895                   | 10601                   | 22599                   |  |
| SAGE_Lung_adenocarcinoma_MD_L9             | lung       | MCD         | 0.895                   | 15131                   | 35916                   |  |
| SAGE_Liver_cholangiocarcinoma_B_K2D        | liver      | bulk        | 0.894                   | 20722                   | 46853                   |  |
| SAGE_Breast_carcinoma_epithelium_AP_DCIS6  | breast     | ABP         | 0.894                   | 30256                   | 72857                   |  |
| SAGE_Stomach_adenocarcinoma_MD_HG7         | stomach    | MCD         | 0.891                   | 34469                   | 93714                   |  |
| SAGE_Breast_carcinoma_epithelium_AP_DCIS-3 | breast     | ABP         | 0.891                   | 31142                   | 57402                   |  |
| SAGE_Breast_carcinoma_B_IDC-4              | breast     | bulk        | 0.891                   | 21531                   | 64095                   |  |
| SAGE_Breast_carcinoma_B_DCIS-5             | breast     | bulk        | 0.889                   | 15935                   | 43098                   |  |
| SAGE_Stomach_carcinoma_B_xenograft_X101    | stomach    | bulk        | 0.888                   | 25022                   | 69749                   |  |
| SAGE_Stomach_carcinoma_B_xenograph_X43     | stomach    | bulk        | 0.886                   | 19923                   | 51620                   |  |
| SAGE_Stomach_adenocarcinoma_MD_HS29        | stomach    | MCD         | 0.886                   | 22385                   | 58831                   |  |
| SAGE_Pancreas_adenocarcinoma_B_96-6252     | pancreas   | bulk        | 0.885                   | 14339                   | 33213                   |  |
| SAGE_Colon_adenocarcinoma_B_Tu98           | colon      | bulk        | 0.884                   | 18794                   | 41371                   |  |
| SAGE_Skin_melanoma_B_DB2                   | skin       | bulk        | 0.884                   | 15667                   | 41338                   |  |
| SAGE_Breast_carcinoma_metastasis_B_2       | breast     | bulk        | 0.883                   | 18625                   | 49794                   |  |
| SAGE_Ovary_adenocarcinoma_B_OVT-7          | ovary      | bulk        | 0.878                   | 19479                   | 53514                   |  |
| SAGE_Breast_carcinoma_epithelium_AP_DCIS7  | breast     | ABP         | 0.878                   | 31311                   | 89184                   |  |
| SAGE_Breast_carcinoma_B_95-259             | breast     | bulk        | 0.877                   | 14924                   | 39364                   |  |
| SAGE_Lung_adenocarcinoma_MD_L10            | lung       | MCD         | 0.876                   | 29062                   | 86887                   |  |
| SAGE_Stomach_adenocarcinoma_B_G234         | stomach    | bulk        | 0.872                   | 21447                   | 64925                   |  |
| SAGE_Breast_carcinoma_B_IDC-5              | breast     | bulk        | 0.871                   | 20457                   | 60451                   |  |
| SAGE_Breast_metastatic_carcinoma_B_95-348  | breast     | bulk        | 0.871                   | 20057                   | 60343                   |  |
| SAGE_Breast_carcinoma_B_IDC-3              | breast     | bulk        | 0.871                   | 22732                   | 68891                   |  |
| SAGE_Kidney_carcinoma_B_D2                 | kidney     | bulk        | 0.867                   | 32412                   | 100281                  |  |
| SAGE_Breast_carcinoma_B_95-347             | breast     | bulk        | 0.866                   | 22561                   | 67070                   |  |
| SAGE_Breast_carcinoma_MD_DCIS              | breast     | MCD         | 0.865                   | 14237                   | 40783                   |  |
| SAGE_Skin_melanoma_B_DB1                   | skin       | bulk        | 0.864                   | 11905                   | 26032                   |  |
| SAGE_Breast_metastatic_carcinoma_B_95-260  | breast     | bulk        | 0.864                   | 15708                   | 45087                   |  |
| SAGE_Breast_carcinoma_B_DCIS-4             | breast     | bulk        | 0.863                   | 20224                   | 60605                   |  |
| SAGE_Thyroid_follicular_carcinoma_B_TT004  | thyroid    | bulk        | 0.861                   | 36863                   | 124664                  |  |
| SAGE_Breast_carcinoma_epithelium_AP_DCIS-2 | breast     | ABP         | 0.860                   | 20611                   | 66168                   |  |
| SAGE_Prostate_carcinoma_B_pool2            | prostate   | bulk        | 0.859                   | 22306                   | 66034                   |  |
| SAGE_Prostate_adenocarcinoma_MD_PR317      | prostate   | MCD         | 0.857                   | 18877                   | 64951                   |  |
| SAGE_Stomach_carcinoma_B_G189              | stomach    | bulk        | 0.857                   | 17672                   | 63075                   |  |
| SAGE_Colon_adenocarcinoma_B_Tu102          | colon      | bulk        | 0.854                   | 22713                   | 55700                   |  |

<sup>a</sup> Epithelial cancer SAGE libraries retrieved based on the search criteria: tag length (short 10bp); tissue preparation [bulk, short term culture (STC), antibody purified (ABP) or microscope dissected (MCD)]; and tissue histology (cancer). The list contains only epithelial cancer libraries that have at least one normal equivalent tissue library, matching the search criteria.

<sup>b</sup> Diversity (color code indicates de  $H_\alpha$  level); <sup>c</sup> Number of unique tags; <sup>d</sup> Number of tags.

| Color code |        |        |        |        |        |        |        |        |        |        |
|------------|--------|--------|--------|--------|--------|--------|--------|--------|--------|--------|
| $H_\alpha$ | <0.860 | <0.865 | <0.870 | <0.875 | <0.880 | <0.885 | <0.890 | <0.895 | <0.900 | ≥0.900 |



**Table S4.** Diversity of cancer cell lines SAGE libraries.

| Library Title <sup>a</sup>                 | Tissue     | Preparation | $H_\alpha$ <sup>b</sup> | $M_\alpha$ <sup>c</sup> | $N_\alpha$ <sup>d</sup> |  |
|--------------------------------------------|------------|-------------|-------------------------|-------------------------|-------------------------|--|
| <i>Brain cancer cell lines</i>             |            |             |                         |                         |                         |  |
| SAGE_Brain_glioblastoma_CL_H392            | brain      | cell line   | 0.886                   | 19417                   | 55990                   |  |
| SAGE_Brain_glioblastoma_hypoxia_CL_H247    | brain      | cell line   | 0.884                   | 24770                   | 71765                   |  |
| SAGE_Brain_glioblastoma_control_CL_H247    | brain      | cell line   | 0.881                   | 19237                   | 60428                   |  |
| SAGE_Brain_medulloblastoma_CL_4-HCR        | cerebellum | cell line   | 0.879                   | 26573                   | 66599                   |  |
| SAGE_Brain_medulloblastoma_CL_mhh-1        | cerebellum | cell line   | 0.879                   | 18542                   | 47858                   |  |
| SAGE_Brain_glioblastoma_CL_H54+LacZ        | brain      | cell line   | 0.878                   | 20539                   | 66908                   |  |
| SAGE_Brain_glioblastoma_CL_H54+EGFRvIII    | brain      | cell line   | 0.877                   | 19079                   | 56982                   |  |
| SAGE_Brain_medulloblastoma_CL_D283         | cerebellum | cell line   | 0.872                   | 25279                   | 66316                   |  |
| SAGE_Brain_medulloblastoma_CL_H341         | cerebellum | cell line   | 0.839                   | 15220                   | 43920                   |  |
| <i>Epithelial cancer cell lines</i>        |            |             |                         |                         |                         |  |
| SAGE_Ovary_carcinoma_CL_A2780              | ovary      | cell line   | 0.928                   | 10675                   | 21369                   |  |
| SAGE_Prostate_carcinoma_CL_PC3_AS2         | prostate   | cell line   | 0.925                   | 20661                   | 40768                   |  |
| SAGE_Prostate_carcinoma_CL_PC3_Mock        | prostate   | cell line   | 0.915                   | 15961                   | 38819                   |  |
| SAGE_Breast_carcinoma_CL_MDA435H48         | breast     | cell line   | 0.908                   | 18060                   | 40323                   |  |
| SAGE_Breast_carcinoma_CL_MDA435C           | breast     | cell line   | 0.906                   | 20080                   | 47270                   |  |
| SAGE_Breast_carcinoma_CL_MDA435H24         | breast     | cell line   | 0.906                   | 20234                   | 46631                   |  |
| SAGE_Ovary_carcinoma_CL_ES2-1              | ovary      | cell line   | 0.898                   | 13583                   | 31159                   |  |
| SAGE_Pancreas_adenocarcinoma_CL_CAPAN1     | pancreas   | cell line   | 0.897                   | 14815                   | 37674                   |  |
| SAGE_Prostate_carcinoma_CL_LNCaP-C         | prostate   | cell line   | 0.894                   | 15561                   | 40029                   |  |
| SAGE_Colon_adenocarcinoma_CL_HCT116        | colon      | cell line   | 0.893                   | 24585                   | 55641                   |  |
| SAGE_Pancreas_adenocarcinoma_CL_Panc1      | pancreas   | cell line   | 0.891                   | 10293                   | 24749                   |  |
| SAGE_Colon_adenocarcinoma_CL_RKO           | colon      | cell line   | 0.889                   | 23086                   | 51294                   |  |
| SAGE_Prostate_carcinoma_CL_A+              | prostate   | cell line   | 0.888                   | 12281                   | 30298                   |  |
| SAGE_Prostate_adenocarcinoma_CL_LNCaP      | prostate   | cell line   | 0.888                   | 9155                    | 22344                   |  |
| SAGE_Colon_adenocarcinoma_CL_Caco2         | colon      | cell line   | 0.885                   | 23111                   | 60682                   |  |
| SAGE_Prostate_carcinoma_CL_LNCaP-T         | prostate   | cell line   | 0.884                   | 15922                   | 43542                   |  |
| SAGE_Breast_carcinoma_CL_ZR75_1_tamoxifen  | breast     | cell line   | 0.883                   | 5017                    | 40052                   |  |
| SAGE_Breast_carcinoma_CL_ZR75_1_untreated  | breast     | cell line   | 0.882                   | 3983                    | 32303                   |  |
| SAGE_Pancreas_carcinoma_CL_PL45            | pancreas   | cell line   | 0.876                   | 11121                   | 29557                   |  |
| SAGE_Colon_adenocarcinoma_CL_SW837         | colon      | cell line   | 0.870                   | 20756                   | 61148                   |  |
| SAGE_Breast_carcinoma_CL_ZR75_1_estrogen   | breast     | cell line   | 0.859                   | 4282                    | 38797                   |  |
| SAGE_Breast_carcinoma_CL_MCF7estradiol_3h  | breast     | cell line   | 0.856                   | 17821                   | 60162                   |  |
| SAGE_Breast_carcinoma_CL_MCF7estradiol_10H | breast     | cell line   | 0.853                   | 17213                   | 60725                   |  |
| SAGE_Prostate_carcinoma_CL_LNCaP           | prostate   | cell line   | 0.849                   | 18404                   | 60250                   |  |
| SAGE_Pancreas_carcinoma_CL_ASPC            | pancreas   | cell line   | 0.847                   | 10622                   | 31224                   |  |
| SAGE_Liver_cholangiocarcinoma_CL_K4        | liver      | cell line   | 0.837                   | 16652                   | 52973                   |  |
| SAGE_Liver_cholangiocarcinoma_CL_K3        | liver      | cell line   | 0.836                   | 16356                   | 54842                   |  |
| SAGE_Prostate_carcinoma_CL_LNCaP_no-DHT    | prostate   | cell line   | 0.835                   | 16768                   | 62160                   |  |
| SAGE_Breast_carcinoma_CL_MCF7control_0h    | breast     | cell line   | 0.834                   | 15401                   | 59877                   |  |

<sup>a</sup> Epithelial and brain cell lines SAGE libraries retrieved based on the search criteria: tag length (short 10bp); tissue preparation (cell lines); and tissue histology (cancer). The list contains only cell lines libraries that have at least one normal equivalent tissue library, matching the search criteria.

<sup>b</sup> Diversity (color code indicates de  $H_\alpha$  level); <sup>c</sup> Number of unique tags; <sup>d</sup> Number of tags.

| Color code |        |        |        |        |        |        |        |        |        |        |
|------------|--------|--------|--------|--------|--------|--------|--------|--------|--------|--------|
| $H_\alpha$ | <0.860 | <0.865 | <0.870 | <0.875 | <0.880 | <0.885 | <0.890 | <0.895 | <0.900 | ≥0.900 |

**Table S5.** Ribosome.

| Gene Name <sup>a</sup>                                                                                           | Symbol   | UniGene   |
|------------------------------------------------------------------------------------------------------------------|----------|-----------|
| Ribosomal protein S27-like                                                                                       | RPS27L   | Hs.108957 |
| Ribosomal protein L41                                                                                            | RPL41    | Hs.112553 |
| Ribosomal protein L3                                                                                             | RPL3     | Hs.119598 |
| Ribosomal protein L36a                                                                                           | RPL36A   | Hs.12332  |
| Ribosomal protein S28                                                                                            | RPS28    | Hs.153177 |
| Ribosomal protein S29                                                                                            | RPS29    | Hs.156367 |
| Ribosomal protein L8                                                                                             | RPL8     | Hs.178551 |
| Ribosomal protein L5                                                                                             | RPL5     | Hs.180946 |
| Ribosomal protein L35                                                                                            | RPL35    | Hs.182825 |
| Ribosomal protein L4                                                                                             | RPL4     | Hs.186350 |
| Ribosomal protein S10                                                                                            | RPS10    | Hs.188882 |
| Ribosomal protein S21                                                                                            | RPS21    | Hs.190968 |
| Ribosomal protein L41                                                                                            | RPL41    | Hs.242947 |
| Ribosomal protein L32                                                                                            | RPL32    | Hs.265174 |
| Chromosome 15 open reading frame 15                                                                              | C15orf15 | Hs.274772 |
| Ribosomal protein S4, Y-linked 1                                                                                 | RPS4Y1   | Hs.282376 |
| Ribosomal protein L41                                                                                            | RPL41    | Hs.282998 |
| Ribosomal protein L17                                                                                            | RPL17    | Hs.293653 |
| Ribosomal protein L39                                                                                            | RPL39    | Hs.300141 |
| Ribosomal protein L10-like                                                                                       | RPL10L   | Hs.308332 |
| Ribosomal protein S27a                                                                                           | RPS27A   | Hs.311640 |
| Ribosomal protein S28                                                                                            | RPS28    | Hs.322473 |
| Ribosomal protein L18a                                                                                           | RPL18A   | Hs.337766 |
| Ribosomal protein S2                                                                                             | RPS2     | Hs.356366 |
| Ribosomal protein L28                                                                                            | RPL28    | Hs.356371 |
| Ribosomal protein, large, P1                                                                                     | RPLP1    | Hs.356502 |
| Ribosomal protein S3A                                                                                            | RPS3A    | Hs.356572 |
| Ribosomal protein S24                                                                                            | RPS24    | Hs.356794 |
| Ribosomal protein L41                                                                                            | RPL41    | Hs.356799 |
| Ribosomal protein S15a                                                                                           | RPS15A   | Hs.370504 |
| Ribosomal protein L17                                                                                            | RPL17    | Hs.374588 |
| Ribosomal protein S5                                                                                             | RPS5     | Hs.378103 |
| Ribosomal protein L38                                                                                            | RPL38    | Hs.380953 |
| Ribosomal protein L19                                                                                            | RPL19    | Hs.381061 |
| Ribosomal protein S2                                                                                             | RPS2     | Hs.381079 |
| Ribosomal protein L21                                                                                            | RPL21    | Hs.381123 |
| Ribosomal protein S14                                                                                            | RPS14    | Hs.381126 |
| Ribosomal protein L15                                                                                            | RPL15    | Hs.381219 |
| Finkel-Biskis-Reilly murine sarcoma virus (FBR-MuSV) ubiquitously expressed (fox derived); ribosomal protein S30 | FAU      | Hs.387208 |
| Ribosomal protein L11                                                                                            | RPL11    | Hs.388664 |
| Ribosomal protein S16                                                                                            | RPS16    | Hs.397609 |
| Ribosomal protein L30                                                                                            | RPL30    | Hs.400295 |
| Ribosomal protein L23                                                                                            | RPL23    | Hs.406300 |
| Ribosomal protein S10                                                                                            | RPS10    | Hs.406620 |
| Ribosomal protein S15                                                                                            | RPS15    | Hs.406683 |
| Ribosomal protein L36                                                                                            | RPL36    | Hs.408018 |
| Ribosomal protein S6                                                                                             | RPS6     | Hs.408073 |
| Ribosomal protein L13                                                                                            | RPL13    | Hs.410817 |

**Table S5. (Continued)**

| Gene Name <sup>a</sup>                                    | Symbol | UniGene   |
|-----------------------------------------------------------|--------|-----------|
| Ribosomal protein L9                                      | RPL9   | Hs.412370 |
| Ribosomal protein L23a                                    | RPL23A | Hs.419463 |
| Ribosomal protein L7                                      | RPL7   | Hs.421257 |
| Ribosomal protein L29                                     | RPL29  | Hs.425125 |
| Ribosomal protein L36a                                    | RPL36A | Hs.432485 |
| Ribosomal protein S17                                     | RPS17  | Hs.433427 |
| Ribosomal protein S11                                     | RPS11  | Hs.433529 |
| Ribosomal protein L37a                                    | RPL37A | Hs.433701 |
| Ribosomal protein L34                                     | RPL34  | Hs.438227 |
| Ribosomal protein S19                                     | RPS19  | Hs.438429 |
| Ribosomal protein L14                                     | RPL14  | Hs.446522 |
| Ribosomal protein S13                                     | RPS13  | Hs.446588 |
| Ribosomal protein S4, X-linked                            | RPS4X  | Hs.446628 |
| Ribosomal protein S26                                     | RPS26  | Hs.447562 |
| Ribosomal protein, large, P0                              | RPLP0  | Hs.448226 |
| Ribosomal protein SA                                      | RPSA   | Hs.449909 |
| Ribosomal protein L19                                     | RPL19  | Hs.458593 |
| Ribosomal protein S9                                      | RPS9   | Hs.467284 |
| Ribosomal protein L31                                     | RPL31  | Hs.469473 |
| Ribosomal protein L24                                     | RPL24  | Hs.477028 |
| Ribosomal protein L26                                     | RPL26  | Hs.482144 |
| Ribosomal protein L17                                     | RPL17  | Hs.485090 |
| Ribosomal protein L29                                     | RPL29  | Hs.486304 |
| Ribosomal protein L9                                      | RPL9   | Hs.495851 |
| Ribosomal protein S2                                      | RPS2   | Hs.498569 |
| Ribosomal protein L7a                                     | RPL7A  | Hs.499839 |
| Ribosomal protein S2                                      | RPS2   | Hs.506997 |
| Ribosomal protein L23                                     | RPL23  | Hs.512542 |
| Ribosomal protein S8                                      | RPS8   | Hs.512675 |
| Ribosomal protein S25                                     | RPS25  | Hs.512676 |
| Ribosomal protein L9                                      | RPL9   | Hs.513083 |
| Ribosomal protein L21                                     | RPL21  | Hs.514118 |
| Ribosomal protein L27                                     | RPL27  | Hs.514196 |
| Ribosomal protein L22                                     | RPL22  | Hs.515329 |
| Ribosomal protein L18                                     | RPL18  | Hs.515517 |
| Ribosomal protein L27a                                    | RPL27A | Hs.523463 |
| Ribosomal protein S23                                     | RPS23  | Hs.527193 |
| Ribosomal protein L6                                      | RPL6   | Hs.528668 |
| Ribosomal protein L35a                                    | RPL35A | Hs.529631 |
| Ubiquitin A-52 residue ribosomal protein fusion product 1 | UBA52  | Hs.5308   |
| Ribosomal protein L5                                      | RPL5   | Hs.532359 |
| Ribosomal protein S7                                      | RPS7   | Hs.534346 |
| Ribosomal protein L10                                     | RPL10  | Hs.534404 |
| Ribosomal protein L10a                                    | RPL10A | Hs.546269 |
| Ribosomal protein L6                                      | RPL6   | Hs.546283 |
| Ribosomal protein, large, P0                              | RPLP0  | Hs.546285 |
| Ribosomal protein S3                                      | RPS3   | Hs.546286 |
| Ribosomal protein S7                                      | RPS7   | Hs.546287 |
| Ribosomal protein S9                                      | RPS9   | Hs.546288 |
| Ribosomal protein S12                                     | RPS12  | Hs.546289 |
| Ribosomal protein S27 (metallopanstimulin 1)              | RPS27  | Hs.546291 |

**Table S5. (Continued)**

| Gene Name <sup>a</sup>                       | Symbol  | UniGene   |
|----------------------------------------------|---------|-----------|
| Ribosomal protein S27a                       | RPS27A  | Hs.546292 |
| Ribosomal protein L13a                       | RPL13A  | Hs.546356 |
| Ribosomal protein L26-like 1                 | RPL26L1 | Hs.546390 |
| Ribosomal protein L24                        | RPL24   | Hs.547172 |
| Ribosomal protein L39                        | RPL39   | Hs.558387 |
| Ribosomal protein L37                        | RPL37   | Hs.558601 |
| Ribosomal protein SA                         | RPSA    | Hs.560655 |
| Ribosomal protein S26                        | RPS26   | Hs.567235 |
| Ribosomal protein L14                        | RPL14   | Hs.567699 |
| Ribosomal protein L26                        | RPL26   | Hs.569777 |
| Ribosomal protein L7                         | RPL7    | Hs.571841 |
| Ribosomal protein L12                        | RPL12   | Hs.579823 |
| Ribosomal protein S2                         | RPS2    | Hs.584910 |
| Ribosomal protein S17                        | RPS17   | Hs.591117 |
| Ribosomal protein L4                         | RPL4    | Hs.591306 |
| Ribosomal protein L15                        | RPL15   | Hs.592455 |
| Ribosomal protein L9                         | RPL9    | Hs.610444 |
| Ribosomal protein S18                        | RPS18   | Hs.627414 |
| Ribosomal protein S27 (metallopanstimulin 1) | RPS27   | Hs.631658 |
| Ribosomal protein L41                        | RPL41   | Hs.632703 |
| Ribosomal protein S26                        | RPS26   | Hs.632726 |
| Ribosomal protein L24                        | RPL24   | Hs.637250 |
| Ribosomal protein S3                         | RPS3    | Hs.642582 |
| Ribosomal protein S14                        | RPS14   | Hs.643170 |
| Ribosomal protein S2                         | RPS2    | Hs.643542 |
| Ribosomal protein L26                        | RPL26   | Hs.643630 |
| Ribosomal protein L37                        | RPL37   | Hs.80545  |
| Ribosomal protein S20                        | RPS20   | Hs.8102   |

<sup>a</sup> Gene set from Kyoto Encyclopedia of Genes and Genomes (KEGG) pathway, Ribosome - Homo sapiens (human) (1). The gene list was also checked in HUGO Database (7) and NCBI Entrez (8) to link the approved gene name with respective UniGene cluster.

**Table S6.** Electron transport chain (ETC).

| Gene Name <sup>a</sup>                                                                    | Symbol   | UniGene   |
|-------------------------------------------------------------------------------------------|----------|-----------|
| COX10 homolog, cytochrome c oxidase assembly protein, heme A: farnesyltransferase (yeast) | COX10    | Hs.462278 |
| COX11 homolog, cytochrome c oxidase assembly protein (yeast)                              | COX11    | Hs.591171 |
| COX15 homolog, cytochrome c oxidase assembly protein (yeast)                              | COX15    | Hs.591916 |
| COX17 cytochrome c oxidase assembly homolog ( <i>S. cerevisiae</i> )                      | COX17    | Hs.534383 |
| Cytochrome c oxidase subunit IV isoform 1                                                 | COX4I1   | Hs.433419 |
| Cytochrome c oxidase subunit IV isoform 2 (lung)                                          | COX4I2   | Hs.277101 |
| Cytochrome c oxidase subunit Va                                                           | COX5A    | Hs.401903 |
| Cytochrome c oxidase subunit Vb                                                           | COX5B    | Hs.1342   |
| Cytochrome c oxidase subunit VIa polypeptide 1                                            | COX6A1   | Hs.497118 |
| Cytochrome c oxidase subunit VIa polypeptide 2                                            | COX6A2   | Hs.250760 |
| Cytochrome c oxidase subunit Vib polypeptide 1 (ubiquitous)                               | COX6B1   | Hs.431668 |
| Cytochrome c oxidase subunit VIb polypeptide 2 (testis)                                   | COX6B2   | Hs.550544 |
| Cytochrome c oxidase subunit VIc                                                          | COX6C    | Hs.351875 |
| Cytochrome c oxidase subunit VIIa polypeptide 1 (muscle)                                  | COX7A1   | Hs.421621 |
| Cytochrome c oxidase subunit VIIa polypeptide 2 (liver)                                   | COX7A2   | Hs.70312  |
| Cytochrome c oxidase subunit VIIa polypeptide 2 like                                      | COX7A2L  | Hs.339639 |
| Cytochrome c oxidase subunit VIIb                                                         | COX7B    | Hs.522699 |
| Cytochrome c oxidase subunit VIIb2                                                        | COX7B2   | Hs.479656 |
| Cytochrome c oxidase subunit VIIc                                                         | COX7C    | Hs.430075 |
| Cytochrome c oxidase subunit 8A (ubiquitous)                                              | COX8A    | Hs.433901 |
| Cytochrome c-1                                                                            | CYC1     | Hs.289271 |
| NADH dehydrogenase (ubiquinone) 1 alpha subcomplex, 1, 7.5kDa                             | NDUFA1   | Hs.534168 |
| NADH dehydrogenase (ubiquinone) 1 alpha subcomplex, 10, 42kDa                             | NDUFA10  | Hs.277677 |
| NADH dehydrogenase (ubiquinone) 1 alpha subcomplex, 11, 14.7kDa                           | NDUFA11  | Hs.406062 |
| NADH dehydrogenase (ubiquinone) 1 alpha subcomplex, 12                                    | NDUFA12  | Hs.506374 |
| NADH dehydrogenase (ubiquinone) 1 alpha subcomplex, 13                                    | NDUFA13  | Hs.534453 |
| NADH dehydrogenase (ubiquinone) 1 alpha subcomplex, 2, 8kDa                               | NDUFA2   | Hs.534333 |
| NADH dehydrogenase (ubiquinone) 1 alpha subcomplex, 3, 9kDa                               | NDUFA3   | Hs.198269 |
| NADH dehydrogenase (ubiquinone) 1 alpha subcomplex, 4, 9kDa                               | NDUFA4   | Hs.50098  |
| NADH dehydrogenase (ubiquinone) 1 alpha subcomplex, 4-like 2                              | NDUFA4L2 | Hs.221447 |
| NADH dehydrogenase (ubiquinone) 1 alpha subcomplex, 5, 13kDa                              | NDUFA5   | Hs.643550 |
| NADH dehydrogenase (ubiquinone) 1 alpha subcomplex, 6, 14kDa                              | NDUFA6   | Hs.274416 |
| NADH dehydrogenase (ubiquinone) 1 alpha subcomplex, 7, 14.5kDa                            | NDUFA7   | Hs.333427 |
| NADH dehydrogenase (ubiquinone) 1 alpha subcomplex, 8, 19kDa                              | NDUFA8   | Hs.495039 |
| NADH dehydrogenase (ubiquinone) 1 alpha subcomplex, 9, 39kDa                              | NDUFA9   | Hs.75227  |
| NADH dehydrogenase (ubiquinone) 1, alpha/beta subcomplex, 1, 8kDa                         | NDUFAB1  | Hs.189716 |
| NADH dehydrogenase (ubiquinone) 1 beta subcomplex, 1, 7kDa                                | NDUFB1   | Hs.183435 |
| NADH dehydrogenase (ubiquinone) 1 beta subcomplex, 10, 22kDa                              | NDUFB10  | Hs.513266 |
| NADH dehydrogenase (ubiquinone) 1 beta subcomplex, 11, 17.3kDa                            | NDUFB11  | Hs.521969 |
| NADH dehydrogenase (ubiquinone) 1 beta subcomplex, 2, 8kDa                                | NDUFB2   | Hs.324250 |
| NADH dehydrogenase (ubiquinone) 1 beta subcomplex, 3, 12kDa                               | NDUFB3   | Hs.109760 |
| NADH dehydrogenase (ubiquinone) 1 beta subcomplex, 4, 15kDa                               | NDUFB4   | Hs.304613 |
| NADH dehydrogenase (ubiquinone) 1 beta subcomplex, 4, 15kDa                               | NDUFB4   | Hs.594079 |
| NADH dehydrogenase (ubiquinone) 1 beta subcomplex, 5, 16kDa                               | NDUFB5   | Hs.518424 |
| NADH dehydrogenase (ubiquinone) 1 beta subcomplex, 6, 17kDa                               | NDUFB6   | Hs.493668 |
| NADH dehydrogenase (ubiquinone) 1 beta subcomplex, 7, 18kDa                               | NDUFB7   | Hs.532853 |
| NADH dehydrogenase (ubiquinone) 1 beta subcomplex, 8, 19kDa                               | NDUFB8   | Hs.523215 |
| NADH dehydrogenase (ubiquinone) 1 beta subcomplex, 9, 22kDa                               | NDUFB9   | Hs.15977  |
| NADH dehydrogenase (ubiquinone) 1, subcomplex unknown, 1, 6kDa                            | NDUFC1   | Hs.84549  |

**Table S6. (Continued).**

| Gene Name <sup>a</sup>                                                            | Symbol  | UniGene   |
|-----------------------------------------------------------------------------------|---------|-----------|
| NADH dehydrogenase (ubiquinone) 1, subcomplex unknown, 2, 14.5kDa                 | NDUFC2  | Hs.407860 |
| NADH dehydrogenase (ubiquinone) Fe-S protein 1, 75kDa (NADH-coenzyme Q reductase) | NDUFS1  | Hs.471207 |
| NADH dehydrogenase (ubiquinone) Fe-S protein 2, 49kDa (NADH-coenzyme Q reductase) | NDUFS2  | Hs.173611 |
| NADH dehydrogenase (ubiquinone) Fe-S protein 3, 30kDa (NADH-coenzyme Q reductase) | NDUFS3  | Hs.502528 |
| NADH dehydrogenase (ubiquinone) Fe-S protein 4, 18kDa (NADH-coenzyme Q reductase) | NDUFS4  | Hs.528222 |
| NADH dehydrogenase (ubiquinone) Fe-S protein 5, 15kDa (NADH-coenzyme Q reductase) | NDUFS5  | Hs.632385 |
| NADH dehydrogenase (ubiquinone) Fe-S protein 6, 13kDa (NADH-coenzyme Q reductase) | NDUFS6  | Hs.408257 |
| NADH dehydrogenase (ubiquinone) Fe-S protein 7, 20kDa (NADH-coenzyme Q reductase) | NDUFS7  | Hs.211914 |
| NADH dehydrogenase (ubiquinone) Fe-S protein 8, 23kDa (NADH-coenzyme Q reductase) | NDUFS8  | Hs.90443  |
| NADH dehydrogenase (ubiquinone) flavoprotein 1, 51kDa                             | NDUFV1  | Hs.7744   |
| NADH dehydrogenase (ubiquinone) flavoprotein 2, 24kDa                             | NDUFV2  | Hs.464572 |
| NADH dehydrogenase (ubiquinone) flavoprotein 3, 10kDa                             | NDUFV3  | Hs.473937 |
| Pyrophosphatase (inorganic) 1                                                     | PPA1    | Hs.437403 |
| Pyrophosphatase (inorganic) 2                                                     | PPA2    | Hs.480452 |
| Succinate dehydrogenase complex, subunit A, flavoprotein (Fp)                     | SDHA    | Hs.440475 |
| Succinate dehydrogenase complex, subunit B, iron sulfur (Ip)                      | SDHB    | Hs.465924 |
| Succinate dehydrogenase complex, subunit C, integral membrane protein, 15kDa      | SDHC    | Hs.444472 |
| Succinate dehydrogenase complex, subunit D, integral membrane protein             | SDHD    | Hs.356270 |
| Ubiquinol-cytochrome c reductase complex (7.2 kD)                                 | UCRC    | Hs.284292 |
| Ubiquinol-cytochrome c reductase, 6.4kDa subunit                                  | UQCR    | Hs.8372   |
| Ubiquinol-cytochrome c reductase binding protein                                  | UQCRB   | Hs.131255 |
| Ubiquinol-cytochrome c reductase core protein I                                   | UQCRC1  | Hs.119251 |
| Ubiquinol-cytochrome c reductase core protein II                                  | UQCRC2  | Hs.592048 |
| Ubiquinol-cytochrome c reductase, Rieske iron-sulfur polypeptide 1                | UQCRFS1 | Hs.170107 |
| Ubiquinol-cytochrome c reductase hinge protein                                    | UQCRH   | Hs.481571 |
| Ubiquinol-cytochrome c reductase, complex III subunit VII, 9.5kDa                 | UQCRQ   | Hs.146602 |

<sup>a</sup> Selected genes from Kyoto Encyclopedia of Genes and Genomes (KEGG) pathway, Oxidative phosphorylation - Homo sapiens (human) (1). The gene list was checked in HUGO Database (7) and NCBI Entrez (8) to link the approved gene name with respective UniGene cluster.

**Table S7.** ATP synthase.

| Gene Name <sup>a</sup>                                                                                                     | Symbol | UniGene   |
|----------------------------------------------------------------------------------------------------------------------------|--------|-----------|
| ATP synthase, H <sup>+</sup> transporting, mitochondrial F1 complex, alpha subunit 1, cardiac muscle                       | ATP5A1 | Hs.298280 |
| ATP synthase, H <sup>+</sup> transporting, mitochondrial F1 complex, beta polypeptide                                      | ATP5B  | Hs.406510 |
| ATP synthase, H <sup>+</sup> transporting, mitochondrial F1 complex, gamma polypeptide 1                                   | ATP5C1 | Hs.271135 |
| ATP synthase, H <sup>+</sup> transporting, mitochondrial F1 complex, delta subunit                                         | ATP5D  | Hs.418668 |
| ATP synthase, H <sup>+</sup> transporting, mitochondrial F1 complex, epsilon subunit                                       | ATP5E  | Hs.177530 |
| ATP synthase, H <sup>+</sup> transporting, mitochondrial F0 complex, subunit B1                                            | ATP5F1 | Hs.514870 |
| ATP synthase, H <sup>+</sup> transporting, mitochondrial F0 complex, subunit C1 (subunit 9)                                | ATP5G1 | Hs.80986  |
| ATP synthase, H <sup>+</sup> transporting, mitochondrial F0 complex, subunit C2 (subunit 9)                                | ATP5G2 | Hs.524464 |
| ATP synthase, H <sup>+</sup> transporting, mitochondrial F0 complex, subunit C3 (subunit 9)                                | ATP5G3 | Hs.429    |
| ATP synthase, H <sup>+</sup> transporting, mitochondrial F0 complex, subunit d                                             | ATP5H  | Hs.514465 |
| ATP synthase, H <sup>+</sup> transporting, mitochondrial F0 complex, subunit E                                             | ATP5I  | Hs.85539  |
| ATP synthase, H <sup>+</sup> transporting, mitochondrial F0 complex, subunit F6                                            | ATP5J  | Hs.246310 |
| ATP synthase, H <sup>+</sup> transporting, mitochondrial F0 complex, subunit F2                                            | ATP5J2 | Hs.521056 |
| ATP synthase, H <sup>+</sup> transporting, mitochondrial F0 complex, subunit F2                                            | ATP5J2 | Hs.567610 |
| ATP synthase, H <sup>+</sup> transporting, mitochondrial F0 complex, subunit G                                             | ATP5L  | Hs.486360 |
| ATP synthase, H <sup>+</sup> transporting, mitochondrial F1 complex, O subunit (oligomycin sensitivity conferring protein) | ATP5O  | Hs.409140 |

<sup>a</sup> Selected genes from Kyoto Encyclopedia of Genes and Genomes (KEGG) pathway, Oxidative phosphorylation - Homo sapiens (human) (1). The gene list was checked in HUGO Database (7) and NCBI Entrez (8) to link the approved gene name with respective UniGene cluster.

**Table S8.** Glycolysis.

| Gene Name <sup>a</sup>                   | Symbol | UniGene   |
|------------------------------------------|--------|-----------|
| Hexokinase 1                             | HK1    | Hs.370365 |
| Glucose phosphate isomerase              | GPI    | Hs.466471 |
| Phosphofructokinase, liver               | PFKL   | Hs.255093 |
| Phosphofructokinase, muscle              | PFKM   | Hs.75160  |
| Phosphofructokinase, platelet            | PFKP   | Hs.26010  |
| Aldolase A, fructose-bisphosphate        | ALDOA  | Hs.513490 |
| Aldolase B, fructose-bisphosphate        | ALDOB  | Hs.530274 |
| Aldolase C, fructose-bisphosphate        | ALDOC  | Hs.155247 |
| Triosephosphate isomerase 1              | TPI1   | Hs.524219 |
| Glyceraldehyde-3-phosphate dehydrogenase | GAPDH  | Hs.479728 |
| Glyceraldehyde-3-phosphate dehydrogenase | GAPDH  | Hs.544577 |
| Glyceraldehyde-3-phosphate dehydrogenase | GAPDH  | Hs.592355 |
| Phosphoglycerate kinase 1                | PGK1   | Hs.78771  |
| Phosphoglycerate kinase 2                | PGK2   | Hs.367727 |
| Phosphoglycerate mutase 1 (brain)        | PGAM1  | Hs.447492 |
| Phosphoglycerate mutase 1 (brain)        | PGAM1  | Hs.592599 |
| Phosphoglycerate mutase 2 (muscle)       | PGAM2  | Hs.632642 |
| Enolase 1, (alpha)                       | ENO1   | Hs.517145 |
| Enolase 2 (gamma, neuronal)              | ENO2   | Hs.511915 |
| Enolase 3 (beta, muscle)                 | ENO3   | Hs.224171 |
| Pyruvate kinase, liver and RBC           | PKLR   | Hs.95990  |
| Pyruvate kinase, muscle                  | PKM2   | Hs.534770 |

<sup>a</sup> Selected genes from Kyoto Encyclopedia of Genes and Genomes (KEGG) pathway, Glycolysis / Gluconeogenesis - Homo sapiens (human) (1). The gene list was checked in HUGO Database (7) and NCBI Entrez (8) to link the approved gene name with respective UniGene cluster.



**Table S9.** Apoptosis.

| Gene Name <sup>a</sup>                                                            | Symbol | UniGene   |
|-----------------------------------------------------------------------------------|--------|-----------|
| V-akt murine thymoma viral oncogene homolog 1                                     | AKT1   | Hs.525622 |
| V-akt murine thymoma viral oncogene homolog 2                                     | AKT2   | Hs.631535 |
| V-akt murine thymoma viral oncogene homolog 3 (protein kinase B, gamma)           | AKT3   | Hs.498292 |
| Apoptotic peptidase activating factor                                             | APAF1  | Hs.552567 |
| Ataxia telangiectasia mutated (includes complementation groups A, C and D)        | ATM    | Hs.435561 |
| BCL2-antagonist of cell death                                                     | BAD    | Hs.370254 |
| BCL2-associated X protein                                                         | BAX    | Hs.631546 |
| B-cell CLL/lymphoma 2                                                             | BCL2   | Hs.150749 |
| BCL2-like 1                                                                       | BCL2L1 | Hs.516966 |
| BH3 interacting domain death agonist                                              | BID    | Hs.591054 |
| Baculoviral IAP repeat-containing 2                                               | BIRC2  | Hs.643515 |
| Baculoviral IAP repeat-containing 3                                               | BIRC3  | Hs.127799 |
| Baculoviral IAP repeat-containing 4                                               | BIRC4  | Hs.356076 |
| Calpain 1, (mu/I) large subunit                                                   | CAPN1  | Hs.502842 |
| Calpain 1, (mu/I) large subunit                                                   | CAPN1  | Hs.521800 |
| Calpain 10                                                                        | CAPN10 | Hs.112218 |
| Calpain 11                                                                        | CAPN11 | Hs.225953 |
| Calpain 2, (m/II) large subunit                                                   | CAPN2  | Hs.350899 |
| Calpain 3, (p94)                                                                  | CAPN3  | Hs.143261 |
| Calpain 5                                                                         | CAPN5  | Hs.248153 |
| Calpain 6                                                                         | CAPN6  | Hs.496593 |
| Calpain 7                                                                         | CAPN7  | Hs.631920 |
| Calpain 9                                                                         | CAPN9  | Hs.498021 |
| Calpain, small subunit 1                                                          | CAPNS1 | Hs.515371 |
| Caspase 10, apoptosis-related cysteine peptidase                                  | CASP10 | Hs.5353   |
| Caspase 3, apoptosis-related cysteine peptidase                                   | CASP3  | Hs.141125 |
| Caspase 6, apoptosis-related cysteine peptidase                                   | CASP6  | Hs.389452 |
| Caspase 7, apoptosis-related cysteine peptidase                                   | CASP7  | Hs.9216   |
| Caspase 8, apoptosis-related cysteine peptidase                                   | CASP8  | Hs.591630 |
| Caspase 9, apoptosis-related cysteine peptidase                                   | CASP9  | Hs.329502 |
| Calpastatin                                                                       | CAST   | Hs.440961 |
| CASP8 and FADD-like apoptosis regulator                                           | CFLAR  | Hs.390736 |
| Conserved helix-loop-helix ubiquitous kinase                                      | CHUK   | Hs.198998 |
| Colony stimulating factor 2 receptor, beta, low-affinity (granulocyte-macrophage) | CSF2RB | Hs.592192 |
| Cytochrome c, somatic                                                             | CYCS   | Hs.437060 |
| Cytochrome c, somatic                                                             | CYCS   | Hs.617193 |
| DNA fragmentation factor, 45kDa, alpha polypeptide                                | DFFA   | Hs.484782 |
| DNA fragmentation factor, 40kDa, beta polypeptide (caspase-activated DNase)       | DFFB   | Hs.133089 |
| Endonuclease G                                                                    | ENDOG  | Hs.591905 |
| Fas (TNFRSF6)-associated via death domain                                         | FADD   | Hs.86131  |
| Fas (TNF receptor superfamily, member 6)                                          | FAS    | Hs.244139 |
| Fas ligand (TNF superfamily, member 6)                                            | FASLG  | Hs.2007   |
| Inhibitor of kappa light polypeptide gene enhancer in B-cells, kinase beta        | IKBKB  | Hs.413513 |

**Table S9. (Continued)**

| Gene Name <sup>a</sup>                                                                                  | Symbol  | UniGene   |
|---------------------------------------------------------------------------------------------------------|---------|-----------|
| Inhibitor of kappa light polypeptide gene enhancer in B-cells, kinase gamma                             | IKBKG   | Hs.43505  |
| Interleukin 1, alpha                                                                                    | IL1A    | Hs.1722   |
| Interleukin 1, beta                                                                                     | IL1B    | Hs.126256 |
| Interleukin 1 receptor, type I                                                                          | IL1R1   | Hs.557403 |
| Interleukin 1 receptor accessory protein                                                                | IL1RAP  | Hs.478673 |
| Interleukin 3 (colony-stimulating factor, multiple)                                                     | IL3     | Hs.694    |
| Interleukin 3 receptor, alpha (low affinity)                                                            | IL3RA   | Hs.632790 |
| Interleukin-1 receptor-associated kinase 1                                                              | IRAK1   | Hs.522819 |
| Interleukin-1 receptor-associated kinase 2                                                              | IRAK2   | Hs.449207 |
| Interleukin-1 receptor-associated kinase 4                                                              | IRAK4   | Hs.138499 |
| Mitogen-activated protein kinase kinase kinase 14                                                       | MAP3K14 | Hs.404183 |
| Myeloid differentiation primary response gene (88)                                                      | MYD88   | Hs.82116  |
| Nuclear factor of kappa light polypeptide gene enhancer in B-cells 1 (p105)                             | NFKB1   | Hs.431926 |
| Nuclear factor of kappa light polypeptide gene enhancer in B-cells 2 (p49/p100)                         | NFKB2   | Hs.73090  |
| Nuclear factor of kappa light polypeptide gene enhancer in B-cells inhibitor, alpha                     | NFKBIA  | Hs.81328  |
| Nerve growth factor, beta polypeptide                                                                   | NGFB    | Hs.2561   |
| Neurotrophic tyrosine kinase, receptor, type 1                                                          | NTRK1   | Hs.406293 |
| Programmed cell death 8 (apoptosis-inducing factor)                                                     | PDCD8   | Hs.424932 |
| Phosphoinositide-3-kinase, class 2, alpha polypeptide                                                   | PIK3C2A | Hs.175343 |
| Phosphoinositide-3-kinase, class 2, beta polypeptide                                                    | PIK3C2B | Hs.497487 |
| Phosphoinositide-3-kinase, class 2, gamma polypeptide                                                   | PIK3C2G | Hs.22500  |
| Phosphoinositide-3-kinase, class 3                                                                      | PIK3C3  | Hs.464971 |
| Phosphoinositide-3-kinase, catalytic, alpha polypeptide                                                 | PIK3CA  | Hs.642725 |
| Phosphoinositide-3-kinase, catalytic, beta polypeptide                                                  | PIK3CB  | Hs.239818 |
| Phosphoinositide-3-kinase, catalytic, delta polypeptide                                                 | PIK3CD  | Hs.518451 |
| Phosphoinositide-3-kinase, catalytic, gamma polypeptide                                                 | PIK3CG  | Hs.32942  |
| Phosphoinositide-3-kinase, regulatory subunit 1 (p85 alpha)                                             | PIK3R1  | Hs.132225 |
| Phosphoinositide-3-kinase, regulatory subunit 1 (p85 alpha)                                             | PIK3R1  | Hs.604502 |
| Phosphoinositide-3-kinase, regulatory subunit 2 (p85 beta)                                              | PIK3R2  | Hs.371344 |
| Phosphoinositide-3-kinase, regulatory subunit 3 (p55, gamma)                                            | PIK3R3  | Hs.534951 |
| Phosphoinositide-3-kinase, regulatory subunit 4, p150                                                   | PIK3R4  | Hs.149032 |
| Phosphoinositide-3-kinase, regulatory subunit 5, p101                                                   | PIK3R5  | Hs.278901 |
| Protein phosphatase 3 (formerly 2B), catalytic subunit, alpha isoform (calcineurin A alpha)             | PPP3CA  | Hs.435512 |
| Protein phosphatase 3 (formerly 2B), catalytic subunit, beta isoform (calcineurin A beta)               | PPP3CB  | Hs.500067 |
| Protein phosphatase 3 (formerly 2B), catalytic subunit, gamma isoform (calcineurin A gamma)             | PPP3CC  | Hs.149413 |
| Protein phosphatase 3 (formerly 2B), regulatory subunit B, 19kDa, alpha isoform (calcineurin B, type I) | PPP3R1  | Hs.280604 |
| Protein kinase, cAMP-dependent, catalytic, alpha                                                        | PRKACA  | Hs.631630 |
| Protein kinase, cAMP-dependent, catalytic, beta                                                         | PRKACB  | Hs.487325 |
| Protein kinase, cAMP-dependent, catalytic, gamma                                                        | PRKACG  | Hs.158029 |
| Protein kinase, cAMP-dependent, regulatory, type I, alpha (tissue specific extinguisher 1)              | PRKAR1A | Hs.280342 |
| Protein kinase, cAMP-dependent, regulatory, type I, beta                                                | PRKAR1B | Hs.520851 |
| Protein kinase, cAMP-dependent, regulatory, type II, alpha                                              | PRKAR2A | Hs.631923 |
| Protein kinase, cAMP-dependent, regulatory, type II, beta                                               | PRKAR2B | Hs.433068 |

**Table S9. (Continued)**

| Gene Name <sup>a</sup>                                                                                                                  | Symbol    | UniGene   |
|-----------------------------------------------------------------------------------------------------------------------------------------|-----------|-----------|
| V-rel reticuloendotheliosis viral oncogene homolog A, nuclear factor of kappa light polypeptide gene enhancer in B-cells 3, p65 (avian) | RELA      | Hs.502875 |
| Receptor (TNFRSF)-interacting serine-threonine kinase 1                                                                                 | RIPK1     | Hs.519842 |
| Tumor necrosis factor (TNF superfamily, member 2)                                                                                       | TNF       | Hs.241570 |
| Tumor necrosis factor receptor superfamily, member 10a                                                                                  | TNFRSF10A | Hs.591834 |
| Tumor necrosis factor receptor superfamily, member 10b                                                                                  | TNFRSF10B | Hs.521456 |
| Tumor necrosis factor receptor superfamily, member 10c, decoy without an intracellular domain                                           | TNFRSF10C | Hs.145269 |
| Tumor necrosis factor receptor superfamily, member 10d, decoy with truncated death domain                                               | TNFRSF10D | Hs.213467 |
| Tumor necrosis factor receptor superfamily, member 1A                                                                                   | TNFRSF1A  | Hs.279594 |
| Tumor necrosis factor (ligand) superfamily, member 10                                                                                   | TNFSF10   | Hs.478275 |
| Tumor protein p53 (Li-Fraumeni syndrome)                                                                                                | TP53      | Hs.408312 |
| TNFRSF1A-associated via death domain                                                                                                    | TRADD     | Hs.460996 |
| TNF receptor-associated factor 2                                                                                                        | TRAF2     | Hs.522506 |

<sup>a</sup> Gene set from Kyoto Encyclopedia of Genes and Genomes (KEGG) pathway, Apoptosis - Homo sapiens (human) (1). The gene list was also checked in HUGO Database (7) and NCBI Entrez (8) to link the approved gene name with respective UniGene cluster.

**Table S10.** Chromosome stability.

| Gene Name <sup>a</sup>                                                                                                                                     | Symbol   | UniGene   |
|------------------------------------------------------------------------------------------------------------------------------------------------------------|----------|-----------|
| Ankyrin repeat domain 26                                                                                                                                   | ANKRD26  | Hs.361041 |
| Adenomatosis polyposis coli 2                                                                                                                              | APC2     | Hs.446376 |
| AT rich interactive domain 4B (RBP1- like)                                                                                                                 | ARID4B   | Hs.575782 |
| Ataxia telangiectasia and Rad3 related                                                                                                                     | ATR      | Hs.271791 |
| BRCA1 associated protein                                                                                                                                   | BRAP     | Hs.577448 |
| BR serine/threonine kinase 1                                                                                                                               | BRSK1    | Hs.182081 |
| Calcium/calmodulin-dependent protein kinase IG                                                                                                             | CAMK1G   | Hs.199068 |
| Calcium/calmodulin-dependent protein kinase (CaM kinase) II beta                                                                                           | CAMK2B   | Hs.351887 |
| CDC6 cell division cycle 6 homolog ( <i>S. cerevisiae</i> )                                                                                                | CDC6     | Hs.405958 |
| Centromere protein E, 312kDa                                                                                                                               | CENPE    | Hs.75573  |
| Centromere protein H                                                                                                                                       | CENPH    | Hs.631967 |
| CHK1 checkpoint homolog ( <i>S. pombe</i> )                                                                                                                | CHEK1    | Hs.24529  |
| CHK2 checkpoint homolog ( <i>S. pombe</i> )                                                                                                                | CHEK2    | Hs.291363 |
| Cylicin, basic protein of sperm head cytoskeleton 2                                                                                                        | CYLC2    | Hs.3232   |
| Death-associated protein kinase 3                                                                                                                          | DAPK3    | Hs.631844 |
| Doublecortin and CaM kinase-like 1                                                                                                                         | DCAMKL1  | Hs.507755 |
| Doublecortin and CaM kinase-like 2                                                                                                                         | DCAMKL2  | Hs.591683 |
| DMC1 dosage suppressor of mck1 homolog, meiosis-specific homologous recombination (yeast)                                                                  | DMC1     | Hs.339396 |
| Excision repair cross-complementing rodent repair deficiency, complementation group 5 (xeroderma pigmentosum, complementation group G (Cockayne syndrome)) | ERCC5    | Hs.258429 |
| Extra spindle poles like 1 ( <i>S. cerevisiae</i> )                                                                                                        | ESPL1    | Hs.153479 |
| Flap structure-specific endonuclease 1                                                                                                                     | FEN1     | Hs.409065 |
| GRIP and coiled-coil domain containing 2                                                                                                                   | GCC2     | Hs.436505 |
| Hormonally upregulated Neu-associated kinase                                                                                                               | HUNK     | Hs.109437 |
| KIAA1166                                                                                                                                                   | KIAA1166 | Hs.28249  |
| Kinetochore associated 1                                                                                                                                   | KNTC1    | Hs.300559 |
| LATS, large tumor suppressor, homolog 1 ( <i>Drosophila</i> )                                                                                              | LATS1    | Hs.549084 |
| MAD1 mitotic arrest deficient-like 1 (yeast)                                                                                                               | MAD1L1   | Hs.209128 |
| Maternal embryonic leucine zipper kinase                                                                                                                   | MELK     | Hs.184339 |
| M-phase phosphoprotein 1                                                                                                                                   | MPHOSPH1 | Hs.240    |
| MRE11 meiotic recombination 11 homolog A ( <i>S. cerevisiae</i> )                                                                                          | MRE11A   | Hs.192649 |
| Nibrin                                                                                                                                                     | NBN      | Hs.492208 |
| Neurofilament, heavy polypeptide 200kDa                                                                                                                    | NEFH     | Hs.198760 |
| NUAK family, SNF1-like kinase, 1                                                                                                                           | NUAK1    | Hs.524692 |
| Origin recognition complex, subunit 1-like (yeast)                                                                                                         | ORC1L    | Hs.17908  |
| P21(CDKN1A)-activated kinase 7                                                                                                                             | PAK7     | Hs.32539  |
| Proliferating cell nuclear antigen                                                                                                                         | PCNA     | Hs.147433 |
| Phosphoinositide-3-kinase, class 2, alpha polypeptide                                                                                                      | PIK3C2A  | Hs.175343 |
| Phosphoinositide-3-kinase, class 2, beta polypeptide                                                                                                       | PIK3C2B  | Hs.497487 |
| Phosphoinositide-3-kinase, class 3                                                                                                                         | PIK3C3   | Hs.464971 |
| Phosphoinositide-3-kinase, catalytic, beta polypeptide                                                                                                     | PIK3CB   | Hs.239818 |
| Phosphoinositide-3-kinase, catalytic, delta polypeptide                                                                                                    | PIK3CD   | Hs.518451 |
| Phosphoinositide-3-kinase, catalytic, gamma polypeptide                                                                                                    | PIK3CG   | Hs.32942  |
| Polymerase (DNA directed), delta 1, catalytic subunit 125kDa                                                                                               | POLD1    | Hs.279413 |
| Polymerase (DNA directed), epsilon                                                                                                                         | POLE     | Hs.524871 |
| Protein kinase, DNA-activated, catalytic polypeptide                                                                                                       | PRKDC    | Hs.491682 |
| RAD1 homolog ( <i>S. pombe</i> )                                                                                                                           | RAD1     | Hs.531879 |
| RAD17 homolog ( <i>S. pombe</i> )                                                                                                                          | RAD17    | Hs.16184  |
| RAD50 homolog ( <i>S. cerevisiae</i> )                                                                                                                     | RAD50    | Hs.128904 |

**Table S10.** (Continued).

| Gene Name <sup>a</sup>                                                          | Symbol  | UniGene   |
|---------------------------------------------------------------------------------|---------|-----------|
| RAD51 homolog (RecA homolog, E. coli) (S. cerevisiae)                           | RAD51   | Hs.631709 |
| RAD51 homolog C (S. cerevisiae)                                                 | RAD51C  | Hs.412587 |
| RAD51-like 3 (S. cerevisiae)                                                    | RAD51L3 | Hs.631757 |
| RAD52 homolog (S. cerevisiae)                                                   | RAD52   | Hs.642610 |
| RAD54 homolog B (S. cerevisiae)                                                 | RAD54B  | Hs.30561  |
| RAD54-like (S. cerevisiae)                                                      | RAD54L  | Hs.523220 |
| Replication factor C (activator 1) 1, 145kDa                                    | RFC1    | Hs.507475 |
| Replication factor C (activator 1) 3, 38kDa                                     | RFC3    | Hs.115474 |
| Replication factor C (activator 1) 4, 37kDa                                     | RFC4    | Hs.591322 |
| Replication factor C (activator 1) 5, 36.5kDa                                   | RFC5    | Hs.506989 |
| Replication protein A1, 70kDa                                                   | RPA1    | Hs.461925 |
| Sirtuin (silent mating type information regulation 2 homolog) 1 (S. cerevisiae) | SIRT1   | Hs.369779 |
| Sirtuin (silent mating type information regulation 2 homolog) 2 (S. cerevisiae) | SIRT2   | Hs.466693 |
| Sirtuin (silent mating type information regulation 2 homolog) 3 (S. cerevisiae) | SIRT3   | Hs.19306  |
| Sirtuin (silent mating type information regulation 2 homolog) 4 (S. cerevisiae) | SIRT4   | Hs.50861  |
| Sirtuin (silent mating type information regulation 2 homolog) 5 (S. cerevisiae) | SIRT5   | Hs.567431 |
| Sirtuin (silent mating type information regulation 2 homolog) 6 (S. cerevisiae) | SIRT6   | Hs.423756 |
| Sirtuin (silent mating type information regulation 2 homolog) 7 (S. cerevisiae) | SIRT7   | Hs.514636 |
| Smu-1 suppressor of mec-8 and unc-52 homolog (C. elegans) (SMU1)                | SMU-1   | Hs.642743 |
| SNF related kinase                                                              | SNRK    | Hs.476052 |
| Topoisomerase (DNA) II binding protein 1                                        | TOPBP1  | Hs.53454  |
| Translocated promoter region (to activated MET oncogene)                        | TPR     | Hs.279640 |
| Xeroderma pigmentosum, complementation group C                                  | XPC     | Hs.475538 |
| X-ray repair complementing defective repair in Chinese hamster cells 1          | XRCC1   | Hs.98493  |
| X-ray repair complementing defective repair in Chinese hamster cells 3          | XRCC3   | Hs.592325 |
| Zinc finger CCCH-type containing 13                                             | ZC3H13  | Hs.136102 |
| ZW10, kinetochore associated, homolog (Drosophila)                              | ZW10    | Hs.503886 |
| Zwilch, kinetochore associated, homolog (Drosophila)                            | ZWILCH  | Hs.21331  |
| ZW10 interactor                                                                 | ZWINT   | Hs.591363 |

<sup>a</sup> List of genes that may trigger chromosome instability when mutated (2). The gene list was checked in HUGO Database (7) and NCBI Entrez (8) to link the approved gene name with respective UniGene cluster.

**Table S11.** Mismatch repair (MMR).

| Gene Name <sup>a</sup>                                               | Symbol | UniGene   |
|----------------------------------------------------------------------|--------|-----------|
| Replication protein A3, 14kDa                                        | RPA3   | Hs.487540 |
| Replication protein A2, 32kDa                                        | RPA2   | Hs.79411  |
| Replication protein A1, 70kDa                                        | RPA1   | Hs.461925 |
| Replication factor C (activator 1) 5, 36.5kDa                        | RFC5   | Hs.506989 |
| Replication factor C (activator 1) 4, 37kDa                          | RFC4   | Hs.591322 |
| Replication factor C (activator 1) 3, 38kDa                          | RFC3   | Hs.115474 |
| Replication factor C (activator 1) 1, 145kDa                         | RFC1   | Hs.507475 |
| Polymerase (DNA-directed), delta 4                                   | POLD4  | Hs.523829 |
| Polymerase (DNA-directed), delta 3, accessory subunit                | POLD3  | Hs.82502  |
| Polymerase (DNA directed), delta 2, regulatory subunit 50kDa         | POLD2  | Hs.306791 |
| Polymerase (DNA directed), delta 1, catalytic subunit 125kDa         | POLD1  | Hs.279413 |
| Postmeiotic segregation increased 2-like 3                           | PMS2L3 | Hs.225784 |
| PMS2 postmeiotic segregation increased 2 ( <i>S. cerevisiae</i> )    | PMS2   | Hs.632637 |
| PMS1 postmeiotic segregation increased 1 ( <i>S. cerevisiae</i> )    | PMS1   | Hs.111749 |
| Proliferating cell nuclear antigen                                   | PCNA   | Hs.147433 |
| MutS homolog 6 ( <i>E. coli</i> )                                    | MSH6   | Hs.445052 |
| MutS homolog 5 ( <i>E. coli</i> )                                    | MSH5   | Hs.371225 |
| MutS homolog 4 ( <i>E. coli</i> )                                    | MSH4   | Hs.216639 |
| MutS homolog 3 ( <i>E. coli</i> )                                    | MSH3   | Hs.280987 |
| MutS homolog 2, colon cancer, nonpolyposis type 1 ( <i>E. coli</i> ) | MSH2   | Hs.597656 |
| MutL homolog 3 ( <i>E. coli</i> )                                    | MLH3   | Hs.436650 |
| MutL homolog 1, colon cancer, nonpolyposis type 2 ( <i>E. coli</i> ) | MLH1   | Hs.195364 |
| Postmeiotic segregation increased 2-like 4                           | PMS2L4 | Hs.632011 |
| Ligase I, DNA, ATP-dependent                                         | LIG1   | Hs.1770   |
| High-mobility group box 1                                            | HMGB1  | Hs.633298 |
| High-mobility group box 1                                            | HMGB1  | Hs.593339 |
| High-mobility group box 1                                            | HMGB1  | Hs.434102 |
| Exonuclease 1                                                        | EXO1   | Hs.498248 |

<sup>a</sup> The list was constructed accordingly to Wood et al. (3) and Jiricny (4). The gene list was checked in HUGO Database (7) and NCBI Entrez (8) to link the approved gene name with respective UniGene cluster.

**Table S12.** Nucleotide-excision repair (NER).

| Gene Name <sup>a</sup>                                                                                                                                     | Symbol | UniGene   |
|------------------------------------------------------------------------------------------------------------------------------------------------------------|--------|-----------|
| Cyclin H                                                                                                                                                   | CCNH   | Hs.292524 |
| Cyclin-dependent kinase 7 (MO15 homolog, <i>Xenopus laevis</i> , cdk-activating kinase)                                                                    | CDK7   | Hs.184298 |
| Centrin, EF-hand protein, 2                                                                                                                                | CETN2  | Hs.82794  |
| Damage-specific DNA binding protein 1, 127kDa                                                                                                              | DDB1   | Hs.290758 |
| Damage-specific DNA binding protein 2, 48kDa                                                                                                               | DDB2   | Hs.643521 |
| General transcription factor IIIH, polypeptide 2, 44kDa                                                                                                    | GTF2H2 | Hs.202179 |
| Excision repair cross-complementing rodent repair deficiency, complementation group 1 (includes overlapping antisense sequence)                            | ERCC1  | Hs.435981 |
| Excision repair cross-complementing rodent repair deficiency, complementation group 2 (xeroderma pigmentosum D)                                            | ERCC2  | Hs.487294 |
| Excision repair cross-complementing rodent repair deficiency, complementation group 3 (xeroderma pigmentosum group B complementing)                        | ERCC3  | Hs.469872 |
| Excision repair cross-complementing rodent repair deficiency, complementation group 4                                                                      | ERCC4  | Hs.567265 |
| Excision repair cross-complementing rodent repair deficiency, complementation group 5 (xeroderma pigmentosum, complementation group G (Cockayne syndrome)) | ERCC5  | Hs.258429 |
| Excision repair cross-complementing rodent repair deficiency, complementation group 8                                                                      | ERCC8  | Hs.435237 |
| General transcription factor IIIH, polypeptide 1, 62kDa                                                                                                    | GTF2H1 | Hs.577202 |
| General transcription factor IIIH, polypeptide 3, 34kDa                                                                                                    | GTF2H3 | Hs.355348 |
| General transcription factor IIIH, polypeptide 4, 52kDa                                                                                                    | GTF2H4 | Hs.485070 |
| General transcription factor IIIH, polypeptide 5                                                                                                           | GTF2H5 | Hs.356224 |
| Ligase I, DNA, ATP-dependent                                                                                                                               | LIG1   | Hs.1770   |
| MMS19-like (MET18 homolog, <i>S. cerevisiae</i> )                                                                                                          | MMS19L | Hs.500721 |
| Menage a trois homolog 1, cyclin H assembly factor ( <i>Xenopus laevis</i> )                                                                               | MNAT1  | Hs.509523 |
| Excision repair cross-complementing rodent repair deficiency, complementation group 6                                                                      | ERCC6  | Hs.133444 |
| RAD23 homolog A ( <i>S. cerevisiae</i> )                                                                                                                   | RAD23A | Hs.643267 |
| RAD23 homolog B ( <i>S. cerevisiae</i> )                                                                                                                   | RAD23B | Hs.521640 |
| Replication protein A1, 70kDa                                                                                                                              | RPA1   | Hs.461925 |
| Replication protein A2, 32kDa                                                                                                                              | RPA2   | Hs.79411  |
| Replication protein A3, 14kDa                                                                                                                              | RPA3   | Hs.487540 |
| XPA binding protein 2                                                                                                                                      | XAB2   | Hs.9822   |
| Xeroderma pigmentosum, complementation group A                                                                                                             | XPA    | Hs.591907 |
| Xeroderma pigmentosum, complementation group C                                                                                                             | XPC    | Hs.475538 |

<sup>a</sup> NER genes accordingly to Wood et al. (3). The gene list was checked in HUGO Database (7) and NCBI Entrez (8) to link the approved gene name with respective UniGene cluster.

**Table S13.** Base-excision repair (BER).

| Gene Name <sup>a</sup>                                                 | Symbol | UniGene   |
|------------------------------------------------------------------------|--------|-----------|
| APEX nuclease (multifunctional DNA repair enzyme) 1                    | APEX1  | Hs.73722  |
| APEX nuclease (apurinic/apyrimidinic endonuclease) 2                   | APEX2  | Hs.555936 |
| Ligase III, DNA, ATP-dependent                                         | LIG3   | Hs.100299 |
| Methyl-CpG binding domain protein 4                                    | MBD4   | Hs.35947  |
| N-methylpurine-DNA glycosylase                                         | MPG    | Hs.459596 |
| MutY homolog (E. coli)                                                 | MUTYH  | Hs.271353 |
| Nei endonuclease VIII-like 1 (E. coli)                                 | NEIL1  | Hs.512732 |
| Nei like 2 (E. coli)                                                   | NEIL2  | Hs.293818 |
| Nth endonuclease III-like 1 (E. coli)                                  | NTHL1  | Hs.66196  |
| 8-oxoguanine DNA glycosylase                                           | OGG1   | Hs.380271 |
| Poly (ADP-ribose) polymerase family, member 1                          | PARP1  | Hs.177766 |
| Poly (ADP-ribose) polymerase family, member 2                          | PARP2  | Hs.409412 |
| Polynucleotide kinase 3'-phosphatase                                   | PNKP   | Hs.78016  |
| Single-strand-selective monofunctional uracil-DNA glycosylase 1        | SMUG1  | Hs.632721 |
| Thymine-DNA glycosylase                                                | TDG    | Hs.584809 |
| Uracil-DNA glycosylase                                                 | UNG    | Hs.191334 |
| X-ray repair complementing defective repair in Chinese hamster cells 1 | XRCC1  | Hs.98493  |

<sup>a</sup> BER genes accordingly to Wood et al. (3). The gene list was checked in HUGO Database (7) and NCBI Entrez (8) to link the approved gene name with respective UniGene cluster.



**Table S14.** Recombinational repair (RER).

| Gene Name <sup>a</sup>                                                                                                        | Symbol  | UniGene   |
|-------------------------------------------------------------------------------------------------------------------------------|---------|-----------|
| RAD51 homolog (RecA homolog, E. coli) ( <i>S. cerevisiae</i> )                                                                | RAD51   | Hs.631709 |
| RAD51-like 1 ( <i>S. cerevisiae</i> )                                                                                         | RAD51L1 | Hs.172587 |
| RAD51 homolog C ( <i>S. cerevisiae</i> )                                                                                      | RAD51C  | Hs.412587 |
| RAD51-like 3 ( <i>S. cerevisiae</i> )                                                                                         | RAD51L3 | Hs.631757 |
| DMC1 dosage suppressor of mck1 homolog, meiosis-specific homologous recombination (yeast)                                     | DMC1    | Hs.339396 |
| X-ray repair complementing defective repair in Chinese hamster cells 3                                                        | XRCC3   | Hs.592325 |
| RAD52 homolog ( <i>S. cerevisiae</i> )                                                                                        | RAD52   | Hs.642610 |
| RAD54-like ( <i>S. cerevisiae</i> )                                                                                           | RAD54L  | Hs.523220 |
| RAD54 homolog B ( <i>S. cerevisiae</i> )                                                                                      | RAD54B  | Hs.30561  |
| Breast cancer 1, early onset                                                                                                  | BRCA1   | Hs.194143 |
| Breast cancer 2, early onset                                                                                                  | BRCA2   | Hs.34012  |
| Split hand/foot malformation (ectrodactyly) type 1                                                                            | SHFM1   | Hs.489201 |
| RAD50 homolog ( <i>S. cerevisiae</i> )                                                                                        | RAD50   | Hs.128904 |
| MRE11 meiotic recombination 11 homolog A ( <i>S. cerevisiae</i> )                                                             | MRE11A  | Hs.192649 |
| Nibrin                                                                                                                        | NBN     | Hs.492208 |
| MUS81 endonuclease homolog ( <i>S. cerevisiae</i> )                                                                           | MUS81   | Hs.288798 |
| Essential meiotic endonuclease 1 homolog 1 ( <i>S. pombe</i> )                                                                | EME1    | Hs.514330 |
| X-ray repair complementing defective repair in Chinese hamster cells 6 (Ku autoantigen, 70kDa)                                | XRCC6   | Hs.292493 |
| X-ray repair complementing defective repair in Chinese hamster cells 5 (double-strand-break rejoining; Ku autoantigen, 80kDa) | XRCC5   | Hs.388739 |
| Protein kinase, DNA-activated, catalytic polypeptide                                                                          | PRKDC   | Hs.491682 |
| Ligase IV, DNA, ATP-dependent                                                                                                 | LIG4    | Hs.166091 |
| X-ray repair complementing defective repair in Chinese hamster cells 4                                                        | XRCC4   | Hs.567359 |
| DNA cross-link repair 1C (PSO2 homolog, <i>S. cerevisiae</i> )                                                                | DCLRE1C | Hs.612774 |
| Nonhomologous end-joining factor 1                                                                                            | NHEJ1   | Hs.225988 |
| X-ray repair complementing defective repair in Chinese hamster cells 2                                                        | XRCC2   | -         |

<sup>a</sup> Recombinational repair genes accordingly to Wood et al. (3). The gene list was checked in HUGO Database (7) and NCBI Entrez (8) to link the approved gene name with respective UniGene cluster.

Table S15. Diversity of SAGE libraries and conserved pathways.

| Tissue <sup>a</sup>                   | Histology <sup>b</sup> | SAGE Library <sup>b</sup>                | Preparation <sup>b</sup> | SAGE tag <sup>c</sup>            |            |            | SAGE tag-to-gene <sup>d</sup> |            |            | Ribosome <sup>e,f</sup> |            |            | ETC <sup>e,f</sup> |            |            | ATP synthase <sup>e,f</sup> |            |            | Glycolysis <sup>e,f</sup> |            |            |
|---------------------------------------|------------------------|------------------------------------------|--------------------------|----------------------------------|------------|------------|-------------------------------|------------|------------|-------------------------|------------|------------|--------------------|------------|------------|-----------------------------|------------|------------|---------------------------|------------|------------|
|                                       |                        |                                          |                          | H $\alpha$                       | M $\alpha$ | N $\alpha$ | H $\alpha$                    | M $\alpha$ | N $\alpha$ | H $\alpha$              | M $\alpha$ | N $\alpha$ | H $\alpha$         | M $\alpha$ | N $\alpha$ | H $\alpha$                  | M $\alpha$ | N $\alpha$ | H $\alpha$                | M $\alpha$ | N $\alpha$ |
| Brain                                 | Cancer                 | SAGE_Brain_astrocytoma_grade_I_B_H1043   | bulk                     | 0.894                            | 30880      | 75922      | 0.885                         | 13453      | 66645      | 0.866                   | 127        | 3766       | 0.876              | 75         | 544        | 0.903                       | 16         | 177        | 0.700                     | 22         | 230        |
|                                       |                        | SAGE_Brain_astrocytoma_grade_II_B_H1127  | bulk                     | 0.844                            | 31165      | 114489     | 0.841                         | 13425      | 104130     | 0.817                   | 127        | 9502       | 0.809              | 75         | 1379       | 0.789                       | 16         | 553        | 0.578                     | 22         | 684        |
|                                       |                        | SAGE_Brain_astrocytoma_grade_II_B_H1359  | bulk                     | 0.877                            | 35555      | 105764     | 0.872                         | 14602      | 94991      | 0.847                   | 127        | 9128       | 0.855              | 75         | 1245       | 0.802                       | 16         | 386        | 0.548                     | 22         | 592        |
|                                       |                        | SAGE_Brain_astrocytoma_grade_II_B_H1388  | bulk                     | 0.864                            | 34081      | 106285     | 0.857                         | 14136      | 94747      | 0.854                   | 127        | 5915       | 0.876              | 75         | 1165       | 0.846                       | 16         | 356        | 0.591                     | 22         | 827        |
|                                       |                        | SAGE_Brain_astrocytoma_grade_II_B_H1501  | bulk                     | 0.871                            | 38047      | 128309     | 0.868                         | 15065      | 116431     | 0.875                   | 127        | 4706       | 0.881              | 75         | 1682       | 0.862                       | 16         | 581        | 0.600                     | 22         | 1136       |
|                                       |                        | SAGE_Brain_astrocytoma_grade_II_B_H1516  | bulk                     | 0.891                            | 42250      | 108116     | 0.884                         | 15948      | 93538      | 0.872                   | 127        | 5734       | 0.867              | 75         | 917        | 0.855                       | 16         | 315        | 0.664                     | 22         | 471        |
|                                       |                        | SAGE_Brain_astrocytoma_grade_II_B_H1518  | bulk                     | 0.863                            | 36310      | 116022     | 0.858                         | 14711      | 103026     | 0.816                   | 127        | 6340       | 0.847              | 75         | 1218       | 0.797                       | 16         | 501        | 0.576                     | 22         | 1090       |
|                                       |                        | SAGE_Brain_astrocytoma_grade_II_B_H1530  | bulk                     | 0.881                            | 34715      | 102439     | 0.876                         | 14304      | 90879      | 0.836                   | 127        | 6770       | 0.843              | 75         | 1032       | 0.787                       | 16         | 288        | 0.603                     | 22         | 449        |
|                                       |                        | SAGE_Brain_astrocytoma_grade_II_B_H1563  | bulk                     | 0.880                            | 30054      | 88568      | 0.871                         | 13252      | 79479      | 0.851                   | 127        | 5214       | 0.855              | 75         | 909        | 0.840                       | 16         | 356        | 0.576                     | 22         | 757        |
|                                       |                        | SAGE_Brain_astrocytoma_grade_III_B_343   | bulk                     | 0.858                            | 29620      | 100158     | 0.852                         | 13086      | 91522      | 0.822                   | 127        | 12732      | 0.813              | 75         | 1412       | 0.793                       | 16         | 588        | 0.541                     | 22         | 958        |
|                                       |                        | SAGE_Brain_astrocytoma_grade_III_B_407   | bulk                     | 0.863                            | 32819      | 108312     | 0.858                         | 14158      | 99266      | 0.841                   | 127        | 16352      | 0.835              | 75         | 1226       | 0.838                       | 16         | 271        | 0.530                     | 22         | 661        |
|                                       |                        | SAGE_Brain_astrocytoma_grade_III_B_439   | bulk                     | 0.861                            | 34620      | 107824     | 0.853                         | 14068      | 97274      | 0.868                   | 127        | 13341      | 0.855              | 75         | 1458       | 0.830                       | 16         | 439        | 0.601                     | 22         | 599        |
|                                       |                        | SAGE_Brain_astrocytoma_grade_III_B_584   | bulk                     | 0.858                            | 30772      | 103008     | 0.854                         | 13453      | 93489      | 0.867                   | 127        | 12766      | 0.860              | 75         | 1275       | 0.824                       | 16         | 418        | 0.590                     | 22         | 722        |
|                                       |                        | SAGE_Brain_astrocytoma_grade_III_B_828   | bulk                     | 0.879                            | 32109      | 99939      | 0.874                         | 13965      | 90631      | 0.872                   | 127        | 8221       | 0.877              | 75         | 1152       | 0.877                       | 16         | 356        | 0.622                     | 22         | 636        |
|                                       |                        | SAGE_Brain_astrocytoma_grade_III_B_H1020 | bulk                     | 0.926                            | 30738      | 51573      | 0.903                         | 12491      | 40436      | 0.864                   | 127        | 1918       | 0.855              | 75         | 210        | 0.862                       | 16         | 61         | 0.746                     | 22         | 81         |
|                                       |                        | SAGE_Brain_astrocytoma_grade_III_B_H1055 | bulk                     | 0.878                            | 37250      | 109886     | 0.872                         | 14891      | 98235      | 0.870                   | 127        | 10603      | 0.877              | 75         | 1061       | 0.864                       | 16         | 330        | 0.624                     | 22         | 494        |
|                                       |                        | SAGE_Brain_astrocytoma_grade_III_B_H1272 | bulk                     | 0.880                            | 34171      | 96059      | 0.873                         | 14313      | 85675      | 0.858                   | 127        | 6608       | 0.852              | 75         | 1155       | 0.823                       | 16         | 383        | 0.568                     | 22         | 692        |
|                                       |                        | SAGE_Brain_astrocytoma_grade_III_B_H1970 | bulk                     | 0.880                            | 35207      | 106982     | 0.875                         | 14281      | 96595      | 0.864                   | 127        | 5796       | 0.849              | 75         | 1614       | 0.866                       | 16         | 445        | 0.606                     | 22         | 1043       |
|                                       |                        | SAGE_Brain_astrocytoma_grade_III_B_R140  | bulk                     | 0.878                            | 36465      | 118733     | 0.876                         | 14791      | 108165     | 0.857                   | 127        | 9503       | 0.823              | 75         | 1747       | 0.826                       | 16         | 453        | 0.442                     | 22         | 716        |
|                                       |                        | SAGE_Brain_astrocytoma_grade_III_B_R927  | bulk                     | 0.877                            | 33747      | 107344     | 0.873                         | 14082      | 97949      | 0.831                   | 127        | 13224      | 0.862              | 75         | 1529       | 0.876                       | 16         | 573        | 0.534                     | 22         | 604        |
|                                       |                        | SAGE_Brain_ependymoblastoma_B_819        | bulk                     | 0.914                            | 14845      | 33975      | 0.903                         | 8670       | 30962      | 0.874                   | 127        | 3001       | 0.855              | 75         | 326        | 0.883                       | 16         | 126        | 0.490                     | 22         | 465        |
|                                       |                        | SAGE_Brain_ependymoma_B_1150             | bulk                     | 0.910                            | 23324      | 62373      | 0.904                         | 11754      | 57238      | 0.859                   | 127        | 5021       | 0.874              | 75         | 558        | 0.849                       | 16         | 228        | 0.515                     | 22         | 331        |
|                                       |                        | SAGE_Brain_ependymoma_B_1394             | bulk                     | 0.896                            | 22956      | 56314      | 0.885                         | 11446      | 51381      | 0.861                   | 127        | 4629       | 0.841              | 75         | 580        | 0.866                       | 16         | 157        | 0.491                     | 22         | 421        |
|                                       |                        | SAGE_Brain_ependymoma_B_239              | bulk                     | 0.908                            | 20459      | 46653      | 0.898                         | 10838      | 41835      | 0.861                   | 127        | 3038       | 0.842              | 75         | 560        | 0.872                       | 16         | 152        | 0.601                     | 22         | 191        |
|                                       |                        | SAGE_Brain_ependymoma_B_H580             | bulk                     | 0.900                            | 25883      | 68614      | 0.890                         | 12506      | 62408      | 0.862                   | 127        | 6882       | 0.874              | 75         | 937        | 0.847                       | 16         | 274        | 0.597                     | 22         | 389        |
|                                       |                        | SAGE_Brain_ependymoma_B_R1023            | bulk                     | 0.884                            | 40027      | 122690     | 0.879                         | 15439      | 109956     | 0.855                   | 127        | 9749       | 0.858              | 75         | 1471       | 0.892                       | 16         | 394        | 0.692                     | 22         | 795        |
|                                       |                        | SAGE_Brain_ependymoma_B_R353             | bulk                     | 0.900                            | 27211      | 73822      | 0.894                         | 12972      | 66928      | 0.851                   | 127        | 5010       | 0.856              | 75         | 549        | 0.800                       | 16         | 233        | 0.470                     | 22         | 791        |
|                                       |                        | SAGE_Brain_ependymoma_B_R455             | bulk                     | 0.898                            | 19611      | 51825      | 0.887                         | 10233      | 47665      | 0.877                   | 127        | 3609       | 0.851              | 75         | 987        | 0.849                       | 16         | 334        | 0.605                     | 22         | 301        |
|                                       |                        | SAGE_Brain_ependymoma_B_R510             | bulk                     | 0.897                            | 30595      | 84073      | 0.892                         | 13690      | 75150      | 0.869                   | 127        | 4404       | 0.867              | 75         | 851        | 0.817                       | 16         | 303        | 0.628                     | 22         | 492        |
|                                       |                        | SAGE_Brain_ependymoma_B_R512             | bulk                     | 0.883                            | 27374      | 75379      | 0.874                         | 12781      | 67584      | 0.866                   | 127        | 4834       | 0.872              | 75         | 836        | 0.822                       | 16         | 319        | 0.531                     | 22         | 826        |
|                                       |                        | SAGE_Brain_ependymoma_B_R582             | bulk                     | 0.871                            | 17282      | 52189      | 0.863                         | 9848       | 48700      | 0.861                   | 127        | 7778       | 0.872              | 75         | 646        | 0.853                       | 16         | 195        | 0.537                     | 22         | 464        |
|                                       |                        | SAGE_Brain_ependymoma_B_R628             | bulk                     | 0.875                            | 39836      | 120431     | 0.868                         | 15386      | 107654     | 0.874                   | 127        | 6261       | 0.889              | 75         | 991        | 0.899                       | 16         | 306        | 0.681                     | 22         | 673        |
|                                       |                        | SAGE_Brain_glioblastoma_B_GBM1062        | bulk                     | 0.820                            | 15504      | 59762      | 0.812                         | 8718       | 55174      | 0.760                   | 127        | 12550      | 0.821              | 75         | 635        | 0.582                       | 16         | 503        | 0.511                     | 22         | 477        |
|                                       |                        | SAGE_Brain_glioblastoma_B_H1110          | bulk                     | 0.891                            | 25812      | 68986      | 0.885                         | 12376      | 62283      | 0.858                   | 127        | 4071       | 0.857              | 75         | 576        | 0.842                       | 16         | 239        | 0.562                     | 22         | 735        |
|                                       |                        | SAGE_Brain_glioblastoma_B_H1353          | bulk                     | 0.875                            | 37773      | 124805     | 0.871                         | 15013      | 113146     | 0.849                   | 127        | 5784       | 0.840              | 75         | 1528       | 0.829                       | 16         | 590        | 0.458                     | 22         | 1943       |
|                                       |                        | SAGE_Brain_glioblastoma_B_H1371          | bulk                     | 0.901                            | 22909      | 49338      | 0.879                         | 10914      | 41889      | 0.860                   | 127        | 4263       | 0.879              | 75         | 401        | 0.738                       | 16         | 170        | 0.546                     | 22         | 250        |
|                                       |                        | SAGE_Brain_glioblastoma_B_H1425C         | bulk                     | 0.874                            | 28204      | 88990      | 0.866                         | 12786      | 82000      | 0.837                   | 127        | 7393       | 0.845              | 75         | 974        | 0.763                       | 16         | 467        | 0.382                     | 22         | 790        |
|                                       |                        | SAGE_Brain_glioblastoma_B_H833           | bulk                     | 0.870                            | 34143      | 100600     | 0.859                         | 13995      | 89877      | 0.849                   | 127        | 5890       | 0.845              | 75         | 988        | 0.826                       | 16         | 302        | 0.417                     | 22         | 2005       |
|                                       |                        | SAGE_Brain_glioblastoma_B_pooled         | bulk                     | 0.902                            | 24020      | 56428      | 0.890                         | 11398      | 49245      | 0.847                   | 127        | 3242       | 0.851              | 75         | 503        | 0.825                       | 16         | 146        | 0.635                     | 22         | 413        |
|                                       |                        | SAGE_Brain_glioblastoma_B_R20            | bulk                     | 0.887                            | 35474      | 101053     | 0.876                         | 14295      | 91008      | 0.850                   | 127        | 5332       | 0.854              | 75         | 1275       | 0.852                       | 16         | 455        | 0.569                     | 22         | 874        |
|                                       |                        | SAGE_Brain_glioblastoma_B_R336           | bulk                     | 0.878                            | 34762      | 102322     | 0.871                         | 14187      | 90281      | 0.825                   | 127        | 5609       | 0.860              | 75         | 895        | 0.816                       | 16         | 369        | 0.322                     | 22         | 1365       |
|                                       |                        | SAGE_Brain_glioblastoma_B_R70            | bulk                     | 0.863                            | 32108      | 99099      | 0.856                         | 13532      | 89969      | 0.837                   | 127        | 7163       | 0.855              | 75         | 1018       | 0.826                       | 16         | 340        | 0.520                     | 22         | 561        |
|                                       |                        | SAGE_Brain_meningioma_grade_II_B_SF2176  | bulk                     | 0.864                            | 16920      | 48711      | 0.853                         | 9042       | 44148      | 0.821                   | 127        | 5135       | 0.826              | 75         | 1418       | 0.842                       | 16         | 387        | 0.586                     | 22         | 500        |
|                                       |                        | SAGE_Brain_meningioma_grade_II_B_SF3622  | bulk                     | 0.872                            | 16264      | 44857      | 0.860                         | 8722       | 40784      | 0.815                   | 127        | 5055       | 0.796              | 75         | 875        | 0.852                       | 16         | 171        | 0.476                     | 22         | 533        |
|                                       |                        | SAGE_Brain_meningioma_grade_III_B_SF2366 | bulk                     | 0.867                            | 20161      | 59786      | 0.857                         | 10451      | 54622      | 0.822                   | 127        | 9896       | 0.837              | 75         | 734        | 0.834                       | 16         | 188        | 0.587                     | 22         | 218        |
|                                       |                        | SAGE_Brain_oligodendroglioma_B_1001      | bulk                     | 0.891                            | 14369      | 32442      | 0.878                         | 8289       | 28438      | 0.877                   | 127        | 3627       | 0.852              | 75         | 357        | 0.856                       | 16         | 119        | 0.675                     | 22         | 116        |
|                                       |                        | SAGE_Brain_oligodendroglioma_B_H988      | bulk                     | 0.905                            | 13982      | 27864      | 0.891                         | 8054       | 24683      | 0.866                   | 127        | 2248       | 0.827              | 75         | 240        | 0.767                       | 16         | 62         | 0.658                     | 22         | 100        |
|                                       |                        | SAGE_Brain_oligodendroglioma_CS_TA2      | STC                      | 0.910                            | 21568      | 46678      | 0.891                         | 10313      | 40586      | 0.860                   | 127        | 2739       | 0.822              | 75         | 519        | 0.848                       | 16         | 143        | 0.544                     | 22         | 206        |
|                                       |                        | SAGE_Brain_glioblastoma_CL_H392          | cell line                | 0.886                            | 19417      | 55990      | 0.877                         | 9822       | 50812      | 0.831                   | 127        | 3885       | 0.851              | 75         | 493        | 0.875                       | 16         | 157        | 0.515                     | 22         | 729        |
|                                       |                        | SAGE_Brain_glioblastoma_CL_H54+EGFRvIII  | cell line                | 0.877                            | 19079      | 56982      | 0.872                         | 10278      | 52624      | 0.868                   | 127        | 4830       | 0.867              | 75         | 666        | 0.889                       | 16         | 204        | 0.551                     | 22         | 610        |
|                                       |                        | SAGE_Brain_glioblastoma_CL_H54+LacZ      | cell line                | 0.878                            | 20539      | 66908      | 0.877                         | 10730      | 62267      | 0.868                   | 127        | 6159       | 0.868              | 75         | 820        | 0.875                       | 16         | 268        | 0.556                     | 22         | 757        |
|                                       |                        | SAGE_Brain_glioblastoma_control_CL_H247  | cell line                | 0.881                            | 19237      | 60428      | 0.879                         | 10332      | 56036      | 0.870                   | 127        | 5501       | 0.848              | 75         | 950        | 0.860                       | 16         | 346        | 0.589                     | 22         | 784        |
|                                       |                        | SAGE_Brain_glioblastoma_hypoxia_CL_H247  | cell line                | 0.884                            | 24770      | 71765      | 0.879                         | 11715      | 65384      | 0.872                   | 127        | 5450       | 0.872              | 75         | 815        | 0.859                       | 16         | 306        | 0.581                     | 22         | 1290       |
|                                       |                        | Normal                                   | Normal                   | SAGE_Brain_normal_cortex_B_BB542 | bulk       | 0.861      | 31683                         | 94233      | 0.854      | 13350                   | 81781      | 0.861      | 127                | 4246       | 0.862      | 75                          | 853        | 0.839      | 16                        | 279        | 0.691      |
| SAGE_Brain_normal_leptomeninges_B_AL2 | bulk                   |                                          |                          | 0.864                            | 26220      | 72473      | 0.853                         | 12171      | 64666      | 0.817                   | 127        | 5493       | 0.844              | 75         | 640        | 0.829                       | 16         | 158        | 0.5                       |            |            |

Table S15. (Continued)

| Tissue <sup>a</sup>                        | Histology <sup>b</sup> | SAGE Library <sup>b</sup>               | Preparation <sup>b</sup> | SAGE tag <sup>c</sup>                              |       |       | SAGE tag-to-gene <sup>d</sup> |       |        | Ribosome <sup>e,d</sup> |       |       | ETC <sup>e,d</sup> |       |       | ATP synthase <sup>e,d</sup> |      |       | Glycolysis <sup>e,d</sup> |     |       |    |     |
|--------------------------------------------|------------------------|-----------------------------------------|--------------------------|----------------------------------------------------|-------|-------|-------------------------------|-------|--------|-------------------------|-------|-------|--------------------|-------|-------|-----------------------------|------|-------|---------------------------|-----|-------|----|-----|
|                                            |                        |                                         |                          | Ha                                                 | Ma    | Na    | Ha                            | Ma    | Na     | Ha                      | Ma    | Na    | Ha                 | Ma    | Na    | Ha                          | Ma   | Na    | Ha                        | Ma  | Na    |    |     |
| Cerebellum                                 | Cancer                 | SAGE_Brain_medulloblastoma_B_1273       | bulk                     | 0.905                                              | 17236 | 38614 | 0.893                         | 9480  | 34366  | 0.847                   | 127   | 3309  | 0.838              | 75    | 429   | 0.870                       | 16   | 142   | 0.635                     | 22  | 209   |    |     |
|                                            |                        | SAGE_Brain_medulloblastoma_B_96-04-P019 | bulk                     | 0.903                                              | 22017 | 52645 | 0.893                         | 10818 | 46181  | 0.827                   | 127   | 5013  | 0.814              | 75    | 535   | 0.740                       | 16   | 281   | 0.622                     | 22  | 342   |    |     |
|                                            |                        | SAGE_Brain_medulloblastoma_B_97-05-P015 | bulk                     | 0.868                                              | 24631 | 69971 | 0.857                         | 11682 | 62376  | 0.840                   | 127   | 13089 | 0.816              | 75    | 627   | 0.775                       | 16   | 293   | 0.470                     | 22  | 362   |    |     |
|                                            |                        | SAGE_Brain_medulloblastoma_B_97-05-P312 | bulk                     | 0.881                                              | 28029 | 74295 | 0.869                         | 12587 | 65679  | 0.863                   | 127   | 10412 | 0.826              | 75    | 952   | 0.863                       | 16   | 304   | 0.640                     | 22  | 354   |    |     |
|                                            |                        | SAGE_Brain_medulloblastoma_B_98-04-P117 | bulk                     | 0.893                                              | 14766 | 32570 | 0.877                         | 8254  | 28353  | 0.854                   | 127   | 6358  | 0.812              | 75    | 376   | 0.825                       | 16   | 131   | 0.483                     | 22  | 117   |    |     |
|                                            |                        | SAGE_Brain_medulloblastoma_B_98-04-P494 | bulk                     | 0.884                                              | 16247 | 43068 | 0.870                         | 8824  | 39238  | 0.796                   | 127   | 6578  | 0.809              | 75    | 678   | 0.764                       | 16   | 350   | 0.427                     | 22  | 361   |    |     |
|                                            |                        | SAGE_Brain_medulloblastoma_B_98-05-P040 | bulk                     | 0.889                                              | 34995 | 89258 | 0.876                         | 13979 | 77507  | 0.830                   | 127   | 10945 | 0.828              | 75    | 1005  | 0.731                       | 16   | 487   | 0.555                     | 22  | 348   |    |     |
|                                            |                        | SAGE_Brain_medulloblastoma_B_98-05-P608 | bulk                     | 0.921                                              | 22675 | 48451 | 0.907                         | 10898 | 42024  | 0.851                   | 127   | 3166  | 0.853              | 75    | 391   | 0.843                       | 16   | 155   | 0.662                     | 22  | 154   |    |     |
|                                            |                        | SAGE_Brain_medulloblastoma_B_98-09-P558 | bulk                     | 0.903                                              | 33598 | 85984 | 0.895                         | 13722 | 74991  | 0.854                   | 127   | 6783  | 0.849              | 75    | 1091  | 0.812                       | 16   | 442   | 0.540                     | 22  | 361   |    |     |
|                                            |                        | SAGE_Brain_medulloblastoma_B_98-13-P301 | bulk                     | 0.897                                              | 17313 | 45342 | 0.887                         | 9639  | 40948  | 0.824                   | 127   | 5428  | 0.839              | 75    | 551   | 0.829                       | 16   | 275   | 0.520                     | 22  | 165   |    |     |
|                                            |                        | SAGE_Brain_medulloblastoma_B_C609       | bulk                     | 0.914                                              | 32456 | 74612 | 0.905                         | 13517 | 63799  | 0.857                   | 127   | 4613  | 0.845              | 75    | 830   | 0.788                       | 16   | 346   | 0.579                     | 22  | 467   |    |     |
|                                            |                        | SAGE_Brain_medulloblastoma_B_DL5        | bulk                     | 0.868                                              | 28721 | 83671 | 0.857                         | 12481 | 74376  | 0.840                   | 127   | 10221 | 0.844              | 75    | 1330  | 0.870                       | 16   | 380   | 0.550                     | 22  | 852   |    |     |
|                                            |                        | SAGE_Brain_medulloblastoma_B_DL7        | bulk                     | 0.883                                              | 25370 | 68392 | 0.874                         | 11994 | 61145  | 0.851                   | 127   | 6734  | 0.827              | 75    | 1175  | 0.792                       | 16   | 463   | 0.624                     | 22  | 585   |    |     |
|                                            |                        | SAGE_Brain_medulloblastoma_B_H1322      | bulk                     | 0.928                                              | 28969 | 59498 | 0.907                         | 12155 | 50920  | 0.813                   | 127   | 4566  | 0.812              | 75    | 590   | 0.782                       | 16   | 195   | 0.624                     | 22  | 176   |    |     |
|                                            |                        | SAGE_Brain_medulloblastoma_B_H1413      | bulk                     | 0.842                                              | 22833 | 61853 | 0.823                         | 10701 | 53596  | 0.810                   | 127   | 9612  | 0.821              | 75    | 510   | 0.680                       | 16   | 380   | 0.445                     | 22  | 404   |    |     |
|                                            |                        | SAGE_Brain_medulloblastoma_B_H275       | bulk                     | 0.877                                              | 26151 | 72318 | 0.865                         | 11938 | 64203  | 0.824                   | 127   | 11000 | 0.817              | 75    | 857   | 0.773                       | 16   | 401   | 0.559                     | 22  | 404   |    |     |
|                                            |                        | SAGE_Brain_medulloblastoma_B_H306       | bulk                     | 0.883                                              | 24714 | 60454 | 0.865                         | 11363 | 53564  | 0.833                   | 127   | 11380 | 0.815              | 75    | 794   | 0.835                       | 16   | 290   | 0.496                     | 22  | 203   |    |     |
|                                            |                        | SAGE_Brain_medulloblastoma_B_H484       | bulk                     | 0.904                                              | 25712 | 57469 | 0.887                         | 11509 | 49865  | 0.836                   | 127   | 7074  | 0.835              | 75    | 683   | 0.786                       | 16   | 353   | 0.479                     | 22  | 316   |    |     |
|                                            |                        | SAGE_Brain_medulloblastoma_B_H876       | bulk                     | 0.876                                              | 25648 | 67404 | 0.864                         | 11737 | 59243  | 0.840                   | 127   | 11815 | 0.826              | 75    | 698   | 0.791                       | 16   | 395   | 0.452                     | 22  | 313   |    |     |
|                                            |                        | SAGE_Brain_medulloblastoma_B_H972       | bulk                     | 0.886                                              | 30675 | 85376 | 0.878                         | 13091 | 74770  | 0.811                   | 127   | 9478  | 0.806              | 75    | 819   | 0.761                       | 16   | 397   | 0.422                     | 22  | 506   |    |     |
|                                            |                        | SAGE_Brain_medulloblastoma_CL_4-HCR     | cell line                | 0.879                                              | 26573 | 66599 | 0.869                         | 11920 | 58373  | 0.871                   | 127   | 9538  | 0.852              | 75    | 928   | 0.879                       | 16   | 318   | 0.628                     | 22  | 364   |    |     |
|                                            |                        | SAGE_Brain_medulloblastoma_CL_D283      | cell line                | 0.872                                              | 25279 | 66316 | 0.862                         | 11551 | 58600  | 0.869                   | 127   | 9697  | 0.866              | 75    | 823   | 0.868                       | 16   | 322   | 0.633                     | 22  | 339   |    |     |
|                                            |                        | SAGE_Brain_medulloblastoma_CL_H341      | cell line                | 0.839                                              | 15220 | 43920 | 0.821                         | 8188  | 39605  | 0.861                   | 127   | 13133 | 0.875              | 75    | 428   | 0.860                       | 16   | 203   | 0.635                     | 22  | 230   |    |     |
|                                            |                        | SAGE_Brain_medulloblastoma_CL_mhh-1     | cell line                | 0.879                                              | 18542 | 47858 | 0.865                         | 9495  | 42848  | 0.863                   | 127   | 8735  | 0.834              | 75    | 808   | 0.848                       | 16   | 270   | 0.483                     | 22  | 402   |    |     |
|                                            |                        | Normal                                  |                          | SAGE_Brain_normal_cerebellum_B_1                   | bulk  | 0.909 | 24357                         | 50385 | 0.896  | 11634                   | 42625 | 0.868 | 127                | 1879  | 0.881 | 75                          | 397  | 0.851 | 16                        | 125 | 0.681 | 22 | 330 |
|                                            |                        |                                         |                          | SAGE_Brain_normal_cerebellum_B_BB542               | bulk  | 0.906 | 19163                         | 40500 | 0.893  | 10026                   | 34765 | 0.854 | 127                | 1570  | 0.836 | 75                          | 332  | 0.780 | 16                        | 121 | 0.687 | 22 | 293 |
|                                            |                        | Breast                                  | Cancer                   | SAGE_Breast_carcinoma_B_95-259                     | bulk  | 0.877 | 14924                         | 39364 | 0.858  | 8418                    | 35804 | 0.759 | 127                | 6189  | 0.714 | 75                          | 638  | 0.770 | 16                        | 226 | 0.548 | 22 | 186 |
|                                            |                        |                                         |                          | SAGE_Breast_carcinoma_B_95-347                     | bulk  | 0.866 | 22561                         | 67070 | 0.856  | 11559                   | 61410 | 0.782 | 127                | 9269  | 0.745 | 75                          | 1028 | 0.824 | 16                        | 225 | 0.558 | 22 | 265 |
|                                            |                        |                                         |                          | SAGE_Breast_carcinoma_B_DCIS-4                     | bulk  | 0.863 | 20224                         | 60605 | 0.854  | 10892                   | 55348 | 0.821 | 127                | 4435  | 0.833 | 75                          | 680  | 0.755 | 16                        | 309 | 0.556 | 22 | 340 |
|                                            |                        |                                         |                          | SAGE_Breast_carcinoma_B_DCIS-5                     | bulk  | 0.889 | 15935                         | 43098 | 0.881  | 9387                    | 39685 | 0.830 | 127                | 4408  | 0.750 | 75                          | 633  | 0.813 | 16                        | 168 | 0.562 | 22 | 268 |
|                                            |                        |                                         |                          | SAGE_Breast_carcinoma_B_IDC-3                      | bulk  | 0.871 | 22732                         | 68891 | 0.862  | 11728                   | 63359 | 0.819 | 127                | 9192  | 0.841 | 75                          | 615  | 0.860 | 16                        | 251 | 0.518 | 22 | 336 |
|                                            |                        |                                         |                          | SAGE_Breast_carcinoma_B_IDC-4                      | bulk  | 0.891 | 21531                         | 64095 | 0.885  | 11191                   | 59283 | 0.821 | 127                | 6812  | 0.825 | 75                          | 864  | 0.841 | 16                        | 290 | 0.478 | 22 | 614 |
|                                            |                        |                                         |                          | SAGE_Breast_carcinoma_B_IDC-5                      | bulk  | 0.871 | 20457                         | 60451 | 0.863  | 10945                   | 55322 | 0.835 | 127                | 7085  | 0.781 | 75                          | 716  | 0.802 | 16                        | 296 | 0.594 | 22 | 242 |
|                                            |                        |                                         |                          | SAGE_Breast_carcinoma_metastasis_B_2               | bulk  | 0.883 | 18625                         | 49794 | 0.872  | 10667                   | 45074 | 0.777 | 127                | 5332  | 0.793 | 75                          | 411  | 0.704 | 16                        | 259 | 0.633 | 22 | 296 |
|                                            |                        |                                         |                          | SAGE_Breast_metastatic_carcinoma_B_95-260          | bulk  | 0.864 | 15708                         | 45087 | 0.845  | 8721                    | 41292 | 0.741 | 127                | 7325  | 0.794 | 75                          | 547  | 0.718 | 16                        | 285 | 0.463 | 22 | 239 |
|                                            |                        |                                         |                          | SAGE_Breast_metastatic_carcinoma_B_95-348          | bulk  | 0.871 | 20057                         | 60343 | 0.862  | 10370                   | 54989 | 0.786 | 127                | 6730  | 0.540 | 75                          | 1877 | 0.812 | 16                        | 270 | 0.535 | 22 | 327 |
|                                            |                        |                                         |                          | SAGE_Breast_carcinoma_MD_DCIS                      | MD    | 0.865 | 14237                         | 40783 | 0.853  | 8139                    | 37162 | 0.771 | 127                | 7326  | 0.796 | 75                          | 462  | 0.753 | 16                        | 176 | 0.532 | 22 | 93  |
|                                            |                        |                                         |                          | SAGE_Breast_carcinoma_epithelium_AP_DCIS-2         | AP    | 0.860 | 20611                         | 66168 | 0.852  | 10498                   | 60800 | 0.825 | 127                | 5361  | 0.556 | 75                          | 1270 | 0.740 | 16                        | 279 | 0.623 | 22 | 181 |
|                                            |                        |                                         |                          | SAGE_Breast_carcinoma_epithelium_AP_DCIS-3         | AP    | 0.891 | 31142                         | 57402 | 0.866  | 12707                   | 46125 | 0.868 | 127                | 1796  | 0.857 | 75                          | 163  | 0.682 | 16                        | 33  | 0.778 | 22 | 76  |
|                                            |                        |                                         |                          | SAGE_Breast_carcinoma_epithelium_AP_DCIS6          | AP    | 0.894 | 30256                         | 72857 | 0.879  | 12779                   | 63350 | 0.842 | 127                | 3332  | 0.857 | 75                          | 306  | 0.818 | 16                        | 113 | 0.556 | 22 | 247 |
|                                            |                        |                                         |                          | SAGE_Breast_carcinoma_epithelium_AP_DCIS7          | AP    | 0.878 | 31311                         | 89184 | 0.865  | 13083                   | 79329 | 0.864 | 127                | 4392  | 0.803 | 75                          | 832  | 0.749 | 16                        | 298 | 0.414 | 22 | 680 |
| SAGE_Breast_carcinoma_CL_MCF7control_0h    | cell line              |                                         |                          | 0.834                                              | 15401 | 59877 | 0.830                         | 8701  | 56035  | 0.815                   | 127   | 11026 | 0.805              | 75    | 1405  | 0.648                       | 16   | 1020  | 0.426                     | 22  | 713   |    |     |
| SAGE_Breast_carcinoma_CL_MCF7estradiol_10H | cell line              |                                         |                          | 0.853                                              | 17213 | 60725 | 0.850                         | 9350  | 56730  | 0.829                   | 127   | 10700 | 0.811              | 75    | 1264  | 0.733                       | 16   | 732   | 0.506                     | 22  | 552   |    |     |
| SAGE_Breast_carcinoma_CL_MCF7estradiol_3h  | cell line              |                                         |                          | 0.856                                              | 17821 | 60162 | 0.851                         | 9692  | 55880  | 0.830                   | 127   | 9952  | 0.832              | 75    | 1154  | 0.733                       | 16   | 627   | 0.463                     | 22  | 471   |    |     |
| SAGE_Breast_carcinoma_CL_MDA435C           | cell line              |                                         |                          | 0.906                                              | 20080 | 47270 | 0.861                         | 15629 | 110405 | 0.807                   | 127   | 3110  | 0.770              | 75    | 445   | 0.766                       | 16   | 194   | 0.443                     | 22  | 986   |    |     |
| SAGE_Breast_carcinoma_CL_MDA435H24         | cell line              |                                         |                          | 0.906                                              | 20234 | 46631 | 0.894                         | 9821  | 41176  | 0.794                   | 127   | 2852  | 0.795              | 75    | 405   | 0.826                       | 16   | 188   | 0.428                     | 22  | 1031  |    |     |
| SAGE_Breast_carcinoma_CL_MDA435H48         | cell line              |                                         |                          | 0.908                                              | 18060 | 40323 | 0.899                         | 9274  | 35857  | 0.819                   | 127   | 2609  | 0.806              | 75    | 380   | 0.771                       | 16   | 153   | 0.415                     | 22  | 716   |    |     |
| SAGE_Breast_carcinoma_CL_ZR75_1_estradiol  | cell line              |                                         |                          | 0.859                                              | 4282  | 38797 | 0.854                         | 3331  | 37379  | 0.809                   | 127   | 8234  | 0.782              | 75    | 1286  | 0.674                       | 16   | 624   | 0.476                     | 22  | 432   |    |     |
| SAGE_Breast_carcinoma_CL_ZR75_1_tamoxifen  | cell line              |                                         |                          | 0.883                                              | 5017  | 40052 | 0.876                         | 3871  | 38614  | 0.827                   | 127   | 6995  | 0.798              | 75    | 1016  | 0.709                       | 16   | 411   | 0.446                     | 22  | 482   |    |     |
| SAGE_Breast_carcinoma_CL_ZR75_1_untreated  | cell line              |                                         |                          | 0.882                                              | 3983  | 32303 | 0.875                         | 3209  | 31346  | 0.838                   | 127   | 6395  | 0.796              | 75    | 946   | 0.690                       | 16   | 387   | 0.450                     | 22  | 402   |    |     |
| Normal                                     |                        |                                         |                          | SAGE_Breast_normal_epithelium_AP_1                 | AP    | 0.880 | 18276                         | 48729 | 0.869  | 9389                    | 44032 | 0.844 | 127                | 5616  | 0.852 | 75                          | 398  | 0.777 | 16                        | 144 | 0.676 | 22 | 207 |
|                                            |                        |                                         |                          | SAGE_Breast_normal_epithelium_AP_Br_N              | AP    | 0.866 | 19190                         | 50512 | 0.850  | 9273                    | 44222 | 0.841 | 127                | 8026  | 0.854 | 75                          | 324  | 0.830 | 16                        | 175 | 0.620 | 22 | 125 |
|                                            |                        |                                         |                          | SAGE_Breast_normal_myoepithelium_AP_myoepithelial1 | AP    | 0.905 | 26342                         | 57222 | 0.878  | 11088                   | 48131 | 0.855 | 127                | 5099  | 0.841 | 75                          | 212  | 0.778 | 16                        | 70  | 0.535 | 22 | 302 |
|                                            |                        |                                         |                          | SAGE_Breast_normal_stroma_AP_1                     | AP    | 0.825 | 23409                         | 79152 | 0.803  | 10831                   | 72318 | 0.809 | 127                | 13069 | 0.833 | 75                          | 428  | 0.751 | 16                        | 232 | 0.661 | 22 | 177 |
|                                            |                        |                                         |                          | SAGE_Breast_normal_organoid_B                      | bulk  | 0.860 | 19602                         | 58181 | 0.846  | 9606                    | 53201 | 0.802 | 127                | 7607  | 0.804 | 75                          | 317  | 0.762 | 16                        | 115 | 0.486 | 22 | 325 |
|                                            |                        |                                         |                          | SAGE_Breast_normal_organoid_B                      | bulk  | 0.854 | 22713                         |       |        |                         |       |       |                    |       |       |                             |      |       |                           |     |       |    |     |

Table S15. (Continued)

| Tissue <sup>a</sup>        | Histology <sup>b</sup> | SAGE Library <sup>b</sup>                    | Preparation <sup>b</sup> | SAGE tag <sup>c</sup>    |                   |                   | SAGE tag-to-gene <sup>d</sup> |                   |                   | Ribosome <sup>e,f</sup> |                   |                   | ETC <sup>g,h</sup> |                   |                   | ATP synthase <sup>e,h</sup> |                   |                   | Glycolysis <sup>e,h</sup> |                   |                   |
|----------------------------|------------------------|----------------------------------------------|--------------------------|--------------------------|-------------------|-------------------|-------------------------------|-------------------|-------------------|-------------------------|-------------------|-------------------|--------------------|-------------------|-------------------|-----------------------------|-------------------|-------------------|---------------------------|-------------------|-------------------|
|                            |                        |                                              |                          | <i>H</i> $\alpha$        | <i>M</i> $\alpha$ | <i>N</i> $\alpha$ | <i>H</i> $\alpha$             | <i>M</i> $\alpha$ | <i>N</i> $\alpha$ | <i>H</i> $\alpha$       | <i>M</i> $\alpha$ | <i>N</i> $\alpha$ | <i>H</i> $\alpha$  | <i>M</i> $\alpha$ | <i>N</i> $\alpha$ | <i>H</i> $\alpha$           | <i>M</i> $\alpha$ | <i>N</i> $\alpha$ | <i>H</i> $\alpha$         | <i>M</i> $\alpha$ | <i>N</i> $\alpha$ |
| Liver                      | Cancer                 | SAGE_Liver_cholangiocarcinoma_B_K1           | bulk                     | 0.940                    | 40476             | 60319             | 0.910                         | 14330             | 42726             | 0.854                   | 127               | 625               | 0.807              | 75                | 118               | 0.769                       | 16                | 34                | 0.601                     | 22                | 102               |
|                            |                        | SAGE_Liver_cholangiocarcinoma_B_K2D          | bulk                     | 0.894                    | 20722             | 46853             | 0.880                         | 10307             | 41521             | 0.819                   | 127               | 6778              | 0.833              | 75                | 474               | 0.742                       | 16                | 177               | 0.460                     | 22                | 277               |
|                            |                        | SAGE_Liver_cholangiocarcinoma_CL_K3          | cell line                | 0.836                    | 16356             | 54842             | 0.824                         | 8882              | 50894             | 0.827                   | 127               | 12513             | 0.815              | 75                | 648               | 0.811                       | 16                | 303               | 0.496                     | 22                | 737               |
|                            |                        | SAGE_Liver_cholangiocarcinoma_CL_K4          | cell line                | 0.837                    | 16652             | 52973             | 0.821                         | 8648              | 48419             | 0.814                   | 127               | 11574             | 0.804              | 75                | 619               | 0.751                       | 16                | 316               | 0.506                     | 22                | 779               |
| Lung                       | Cancer                 | SAGE_Liver_normal_B_1                        | bulk                     | 0.792                    | 15496             | 66308             | 0.776                         | 8701              | 61928             | 0.840                   | 127               | 3272              | 0.855              | 75                | 805               | 0.780                       | 16                | 325               | 0.514                     | 22                | 257               |
|                            |                        | SAGE_Lung_adenocarcinoma_MD_I10              | MD                       | 0.876                    | 29062             | 86887             | 0.867                         | 13208             | 80012             | 0.841                   | 127               | 7991              | 0.878              | 75                | 653               | 0.852                       | 16                | 180               | 0.614                     | 22                | 416               |
|                            |                        | SAGE_Lung_adenocarcinoma_MD_I9               | MD                       | 0.895                    | 15131             | 35916             | 0.881                         | 8933              | 33205             | 0.830                   | 127               | 3704              | 0.874              | 75                | 283               | 0.846                       | 16                | 78                | 0.661                     | 22                | 169               |
| Ovary                      | Cancer                 | SAGE_Lung_normal_B_1                         | bulk                     | 0.852                    | 24764             | 88708             | 0.847                         | 12086             | 82620             | 0.824                   | 127               | 9438              | 0.854              | 75                | 899               | 0.753                       | 16                | 421               | 0.551                     | 22                | 313               |
|                            |                        | SAGE_Ovary_adenocarcinoma_B_OVT-6            | bulk                     | 0.905                    | 18440             | 41443             | 0.893                         | 9945              | 36749             | 0.862                   | 127               | 2920              | 0.864              | 75                | 266               | 0.855                       | 16                | 102               | 0.503                     | 22                | 311               |
| Pancreas                   | Cancer                 | SAGE_Ovary_adenocarcinoma_B_OVT-7            | bulk                     | 0.878                    | 19479             | 53514             | 0.866                         | 10285             | 48468             | 0.856                   | 127               | 4883              | 0.857              | 75                | 606               | 0.874                       | 16                | 192               | 0.588                     | 22                | 387               |
|                            |                        | SAGE_Ovary_adenocarcinoma_B_OVT-8            | bulk                     | 0.925                    | 16312             | 31987             | 0.912                         | 9210              | 27910             | 0.861                   | 127               | 2530              | 0.866              | 75                | 241               | 0.836                       | 16                | 85                | 0.601                     | 22                | 152               |
|                            |                        | SAGE_Ovary_carcinoma_CL_A2780                | cell line                | 0.928                    | 10675             | 21369             | 0.917                         | 6718              | 19236             | 0.867                   | 127               | 2708              | 0.870              | 75                | 269               | 0.851                       | 16                | 122               | 0.593                     | 22                | 202               |
|                            |                        | SAGE_Ovary_carcinoma_CL_ES2-1                | cell line                | 0.898                    | 13583             | 31159             | 0.887                         | 7738              | 28155             | 0.857                   | 127               | 4360              | 0.815              | 75                | 258               | 0.839                       | 16                | 105               | 0.575                     | 22                | 247               |
|                            |                        | SAGE_Ovary_normal_CS_HOSE_4                  | STC                      | 0.861                    | 15994             | 47728             | 0.849                         | 8499              | 43479             | 0.832                   | 127               | 6384              | 0.813              | 75                | 599               | 0.776                       | 16                | 305               | 0.542                     | 22                | 692               |
|                            |                        | SAGE_Pancreas_adenocarcinoma_B_91-16113      | bulk                     | 0.895                    | 15793             | 33582             | 0.878                         | 8768              | 29772             | 0.857                   | 127               | 1487              | 0.862              | 75                | 155               | 0.802                       | 16                | 66                | 0.563                     | 22                | 184               |
|                            |                        | SAGE_Pancreas_adenocarcinoma_B_96-6252       | bulk                     | 0.885                    | 14339             | 33213             | 0.871                         | 8573              | 30189             | 0.841                   | 127               | 1809              | 0.858              | 75                | 195               | 0.849                       | 16                | 70                | 0.512                     | 22                | 200               |
|                            |                        | SAGE_Pancreas_adenocarcinoma_CL_CAPAN1       | cell line                | 0.897                    | 14815             | 37674             | 0.888                         | 8929              | 34728             | 0.854                   | 127               | 5542              | 0.871              | 75                | 398               | 0.828                       | 16                | 131               | 0.564                     | 22                | 170               |
|                            |                        | SAGE_Pancreas_adenocarcinoma_CL_Panc1        | cell line                | 0.891                    | 10293             | 24749             | 0.877                         | 6504              | 22560             | 0.674                   | 127               | 3653              | 0.838              | 75                | 296               | 0.764                       | 16                | 120               | 0.576                     | 22                | 100               |
|                            |                        | SAGE_Pancreas_carcinoma_CL_ASPC              | cell line                | 0.847                    | 10622             | 31224             | 0.837                         | 6626              | 28740             | 0.853                   | 127               | 4052              | 0.857              | 75                | 296               | 0.787                       | 16                | 121               | 0.546                     | 22                | 208               |
|                            |                        | SAGE_Pancreas_carcinoma_CL_PL45              | cell line                | 0.876                    | 11121             | 29557             | 0.865                         | 6869              | 27210             | 0.857                   | 127               | 4052              | 0.848              | 75                | 359               | 0.823                       | 16                | 116               | 0.504                     | 22                | 299               |
|                            |                        | SAGE_Pancreas_normal_CS_H126                 | STC                      | 0.877                    | 12360             | 32223             | 0.863                         | 7265              | 28925             | 0.827                   | 127               | 6821              | 0.784              | 75                | 324               | 0.821                       | 16                | 97                | 0.656                     | 22                | 152               |
| SAGE_Pancreas_normal_CS_HX | STC                    | 0.877                                        | 12392                    | 31985                    | 0.864             | 7351              | 28811                         | 0.827             | 127               | 6802                    | 0.790             | 75                | 329                | 0.753             | 16                | 89                          | 0.658             | 22                | 150                       |                   |                   |
| Peritoneum                 | Cancer                 | SAGE_Peritoneum_mesothelioma_B_12            | bulk                     | 0.906                    | 14103             | 32529             | 0.894                         | 8282              | 29621             | 0.861                   | 127               | 2334              | 0.875              | 75                | 258               | 0.844                       | 16                | 98                | 0.599                     | 22                | 214               |
|                            |                        | SAGE_Peritoneum_normal_B_13                  | bulk                     | 0.896                    | 22799             | 53527             | 0.879                         | 10824             | 46937             | 0.840                   | 127               | 1902              | 0.836              | 75                | 280               | 0.804                       | 16                | 118               | 0.517                     | 22                | 331               |
| Prostate                   | Cancer                 | SAGE_Prostate_carcinoma_B_LN-1               | bulk                     | 0.895                    | 10601             | 22599             | 0.861                         | 6100              | 20615             | 0.739                   | 127               | 4328              | 0.725              | 75                | 315               | 0.723                       | 16                | 137               | 0.619                     | 22                | 94                |
|                            |                        | SAGE_Prostate_carcinoma_B_pool2              | bulk                     | 0.859                    | 22306             | 66034             | 0.846                         | 10923             | 59110             | 0.860                   | 127               | 13632             | 0.865              | 75                | 1102              | 0.865                       | 16                | 320               | 0.566                     | 22                | 267               |
|                            |                        | SAGE_Prostate_adenocarcinoma_MD_PR317        | MD                       | 0.857                    | 18877             | 64951             | 0.853                         | 10352             | 61176             | 0.854                   | 127               | 10985             | 0.853              | 75                | 925               | 0.856                       | 16                | 317               | 0.534                     | 22                | 299               |
|                            |                        | SAGE_Prostate_adenocarcinoma_CL_LNcaP        | cell line                | 0.888                    | 9155              | 22344             | 0.880                         | 5829              | 20292             | 0.825                   | 127               | 4024              | 0.837              | 75                | 337               | 0.744                       | 16                | 132               | 0.569                     | 22                | 206               |
|                            |                        | SAGE_Prostate_carcinoma_CL_A+                | cell line                | 0.888                    | 12281             | 30298             | 0.878                         | 7159              | 27027             | 0.823                   | 127               | 5409              | 0.830              | 75                | 395               | 0.764                       | 16                | 164               | 0.551                     | 22                | 188               |
|                            |                        | SAGE_Prostate_carcinoma_CL_LNcaP             | cell line                | 0.849                    | 18404             | 60250             | 0.838                         | 9865              | 55391             | 0.859                   | 127               | 13769             | 0.870              | 75                | 1090              | 0.876                       | 16                | 368               | 0.566                     | 22                | 302               |
|                            |                        | SAGE_Prostate_carcinoma_CL_LNcaP_no-DHT      | cell line                | 0.835                    | 16768             | 62160             | 0.825                         | 9081              | 57219             | 0.854                   | 127               | 15525             | 0.843              | 75                | 1252              | 0.865                       | 16                | 383               | 0.637                     | 22                | 323               |
|                            |                        | SAGE_Prostate_carcinoma_CL_LNcaP-C           | cell line                | 0.894                    | 15561             | 40029             | 0.886                         | 9010              | 36721             | 0.871                   | 127               | 5259              | 0.868              | 75                | 578               | 0.846                       | 16                | 196               | 0.575                     | 22                | 214               |
|                            |                        | SAGE_Prostate_carcinoma_CL_LNcaP-T           | cell line                | 0.884                    | 15922             | 43542             | 0.878                         | 9155              | 40045             | 0.875                   | 127               | 5843              | 0.863              | 75                | 605               | 0.850                       | 16                | 220               | 0.566                     | 22                | 273               |
|                            |                        | SAGE_Prostate_carcinoma_CL_PC3_AS2           | cell line                | 0.925                    | 20661             | 40768             | 0.912                         | 10356             | 35425             | 0.847                   | 127               | 2275              | 0.824              | 75                | 316               | 0.849                       | 16                | 103               | 0.665                     | 22                | 191               |
|                            |                        | SAGE_Prostate_carcinoma_CL_PC3_Mock          | cell line                | 0.915                    | 15961             | 38819             | 0.906                         | 8922              | 35577             | 0.836                   | 127               | 3094              | 0.823              | 75                | 493               | 0.808                       | 16                | 153               | 0.523                     | 22                | 338               |
|                            |                        | SAGE_Prostate_normal_epithelium_CS_confluent | STC                      | 0.786                    | 15164             | 71897             | 0.778                         | 8489              | 66766             | 0.823                   | 127               | 19885             | 0.826              | 75                | 1199              | 0.756                       | 16                | 624               | 0.440                     | 22                | 652               |
|                            |                        | SAGE_Prostate_normal_epithelium_CS_senescent | STC                      | 0.800                    | 16963             | 71717             | 0.788                         | 9010              | 66633             | 0.836                   | 127               | 18367             | 0.845              | 75                | 1009              | 0.736                       | 16                | 555               | 0.352                     | 22                | 961               |
|                            |                        | SAGE_Prostate_normal_MD_PR317                | MD                       | 0.865                    | 18732             | 59277             | 0.856                         | 10242             | 55625             | 0.857                   | 127               | 7969              | 0.844              | 75                | 751               | 0.816                       | 16                | 258               | 0.561                     | 22                | 379               |
|                            |                        | SAGE_Prostate_normal_B_2                     | bulk                     | 0.855                    | 20456             | 64058             | 0.843                         | 10563             | 58427             | 0.860                   | 127               | 13690             | 0.865              | 75                | 1154              | 0.862                       | 16                | 337               | 0.580                     | 22                | 285               |
|                            |                        | Skin                                         | Cancer                   | SAGE_Skin_melanoma_B_DB1 | bulk              | 0.864             | 11905                         | 26032             | 0.839             | 6115                    | 21341             | 0.739             | 127                | 508               | 0.699             | 75                          | 87                | 0.511             | 16                        | 30                | 0.509             |
| SAGE_Skin_melanoma_B_DB2   | bulk                   |                                              |                          | 0.884                    | 15667             | 41338             | 0.858                         | 8012              | 38189             | 0.783                   | 127               | 6595              | 0.812              | 75                | 894               | 0.688                       | 16                | 432               | 0.624                     | 22                | 459               |
| SAGE_Skin_melanoma_B_DB3   | bulk                   |                                              |                          | 0.928                    | 6267              | 11399             | -                             | -                 | -                 | -                       | -                 | -                 | -                  | -                 | -                 | -                           | -                 | -                 | -                         | -                 | -                 |
| Stomach                    | Cancer                 | SAGE_Skin_normal_B_NS                        | bulk                     | 0.892                    | 15246             | 36615             | 0.878                         | 8386              | 31892             | 0.806                   | 127               | 3282              | 0.788              | 75                | 228               | 0.799                       | 16                | 74                | 0.679                     | 22                | 86                |
|                            |                        | SAGE_Stomach_adenocarcinoma_B_G234           | bulk                     | 0.872                    | 21447             | 64925             | 0.864                         | 11095             | 60662             | 0.863                   | 127               | 5653              | 0.854              | 75                | 873               | 0.826                       | 16                | 241               | 0.571                     | 22                | 415               |
|                            |                        | SAGE_Stomach_carcinoma_B_G189                | bulk                     | 0.857                    | 17672             | 63075             | 0.854                         | 9937              | 59313             | 0.841                   | 127               | 10001             | 0.851              | 75                | 762               | 0.854                       | 16                | 232               | 0.478                     | 22                | 409               |
|                            |                        | SAGE_Stomach_carcinoma_B_xenograph_X101      | bulk                     | 0.888                    | 25022             | 69749             | 0.879                         | 11485             | 60158             | 0.865                   | 127               | 5987              | 0.848              | 75                | 937               | 0.829                       | 16                | 268               | 0.585                     | 22                | 425               |
|                            |                        | SAGE_Stomach_carcinoma_B_xenograph_X43       | bulk                     | 0.886                    | 19923             | 51620             | 0.875                         | 9990              | 45238             | 0.852                   | 127               | 4803              | 0.823              | 75                | 644               | 0.794                       | 16                | 206               | 0.603                     | 22                | 289               |
|                            |                        | SAGE_Stomach_adenocarcinoma_MD_G329          | MD                       | 0.898                    | 19208             | 46802             | 0.883                         | 10167             | 42208             | 0.823                   | 127               | 4483              | 0.816              | 75                | 449               | 0.758                       | 16                | 159               | 0.564                     | 22                | 257               |
|                            |                        | SAGE_Stomach_adenocarcinoma_MD_HG7           | MD                       | 0.891                    | 34469             | 93714             | 0.879                         | 14083             | 81077             | 0.853                   | 127               | 7540              | 0.836              | 75                | 808               | 0.823                       | 16                | 332               | 0.632                     | 22                | 473               |
|                            |                        | SAGE_Stomach_adenocarcinoma_MD_HS29          | MD                       | 0.886                    | 22385             | 58831             | 0.870                         | 11319             | 53416             | 0.844                   | 127               | 5229              | 0.847              | 75                | 524               | 0.811                       | 16                | 174               | 0.641                     | 22                | 310               |
|                            |                        | SAGE_Stomach_normal_MD_13S                   | MD                       | 0.785                    | 15700             | 45908             | 0.753                         | 8420              | 40109             | 0.868                   | 127               | 2419              | 0.838              | 75                | 365               | 0.838                       | 16                | 121               | 0.530                     | 22                | 56                |
|                            |                        | SAGE_Stomach_normal_MD_14S                   | MD                       | 0.819                    | 18718             | 73353             | 0.811                         | 10176             | 67718             | 0.833                   | 127               | 7237              | 0.796              | 75                | 941               | 0.834                       | 16                | 269               | 0.477                     | 22                | 267               |
|                            |                        | SAGE_Stomach_normal_B_antrum                 | bulk                     | 0.848                    | 9349              | 26653             | 0.836                         | 6247              | 24850             | 0.829                   | 127               | 2748              | 0.762              | 75                | 341               | 0.813                       | 16                | 102               | 0.479                     | 22                | 87                |
|                            |                        | SAGE_Stomach_normal_epithelium_B_body1       | bulk                     | 0.783                    | 8907              | 24761             | 0.757                         | 5700              | 22385             | 0.861                   | 127               | 1435              | 0.855              | 75                | 201               | 0.886                       | 16                | 84                | 0.544                     | 22                | 35                |
| Thyroid                    | Cancer                 | SAGE_Thyroid_follicular_carcinoma_B_TT004    | bulk                     | 0.861                    | 36863             | 124664            | 0.857                         | 14498             | 111981            | 0.838                   | 127               | 17459             | 0.825              | 75                | 2828              | 0.768                       | 16                | 974               | 0.435                     | 22                | 932               |

Table S16. Diversity of genome stability pathways.

| Tissue <sup>a</sup>                      | Histology <sup>b</sup> | SAGE Library <sup>b</sup>                | Preparation <sup>b</sup> | Apoptosis <sup>cd</sup> |            |            | Chromosome stability <sup>cd</sup> |            |            | MMR <sup>cd</sup> |            |            | NER <sup>de</sup> |            |            | BER <sup>de</sup> |            |            | RR <sup>cd</sup> |            |            |
|------------------------------------------|------------------------|------------------------------------------|--------------------------|-------------------------|------------|------------|------------------------------------|------------|------------|-------------------|------------|------------|-------------------|------------|------------|-------------------|------------|------------|------------------|------------|------------|
|                                          |                        |                                          |                          | H $\alpha$              | M $\alpha$ | N $\alpha$ | H $\alpha$                         | M $\alpha$ | N $\alpha$ | H $\alpha$        | M $\alpha$ | N $\alpha$ | H $\alpha$        | M $\alpha$ | N $\alpha$ | H $\alpha$        | M $\alpha$ | N $\alpha$ | H $\alpha$       | M $\alpha$ | N $\alpha$ |
| Brain                                    | Cancer                 | SAGE_Brain_astrocytoma_grade_I_B_H1043   | bulk                     | 0.798                   | 99         | 382        | 0.538                              | 77         | 363        | 0.729             | 28         | 80         | 0.531             | 28         | 223        | 0.835             | 17         | 27         | 0.782            | 24         | 64         |
|                                          |                        | SAGE_Brain_astrocytoma_grade_II_B_H1127  | bulk                     | 0.764                   | 99         | 580        | 0.705                              | 77         | 244        | 0.709             | 28         | 117        | 0.541             | 28         | 265        | 0.722             | 17         | 63         | 0.652            | 24         | 94         |
|                                          |                        | SAGE_Brain_astrocytoma_grade_II_B_H1359  | bulk                     | 0.812                   | 99         | 451        | 0.757                              | 77         | 266        | 0.794             | 28         | 126        | 0.541             | 28         | 306        | 0.785             | 17         | 86         | 0.702            | 24         | 101        |
|                                          |                        | SAGE_Brain_astrocytoma_grade_II_B_H1388  | bulk                     | 0.641                   | 99         | 725        | 0.721                              | 77         | 272        | 0.707             | 28         | 101        | 0.281             | 28         | 580        | 0.763             | 17         | 73         | 0.708            | 24         | 76         |
|                                          |                        | SAGE_Brain_astrocytoma_grade_II_B_H1501  | bulk                     | 0.779                   | 99         | 663        | 0.691                              | 77         | 326        | 0.793             | 28         | 109        | 0.677             | 28         | 265        | 0.902             | 17         | 88         | 0.701            | 24         | 90         |
|                                          |                        | SAGE_Brain_astrocytoma_grade_II_B_H1516  | bulk                     | 0.813                   | 99         | 500        | 0.663                              | 77         | 436        | 0.793             | 28         | 105        | 0.540             | 28         | 241        | 0.825             | 17         | 71         | 0.853            | 24         | 81         |
|                                          |                        | SAGE_Brain_astrocytoma_grade_II_B_H1518  | bulk                     | 0.711                   | 99         | 679        | 0.721                              | 77         | 278        | 0.777             | 28         | 125        | 0.352             | 28         | 452        | 0.777             | 17         | 95         | 0.657            | 24         | 113        |
|                                          |                        | SAGE_Brain_astrocytoma_grade_II_B_H1530  | bulk                     | 0.770                   | 99         | 460        | 0.665                              | 77         | 319        | 0.831             | 28         | 125        | 0.563             | 28         | 220        | 0.766             | 17         | 90         | 0.665            | 24         | 81         |
|                                          |                        | SAGE_Brain_astrocytoma_grade_II_B_H1563  | bulk                     | 0.784                   | 99         | 397        | 0.615                              | 77         | 286        | 0.717             | 28         | 105        | 0.719             | 28         | 167        | 0.723             | 17         | 52         | 0.686            | 24         | 66         |
|                                          |                        | SAGE_Brain_astrocytoma_grade_III_B_343   | bulk                     | 0.781                   | 99         | 436        | 0.722                              | 77         | 226        | 0.763             | 28         | 88         | 0.437             | 28         | 281        | 0.650             | 17         | 71         | 0.630            | 24         | 125        |
|                                          |                        | SAGE_Brain_astrocytoma_grade_III_B_407   | bulk                     | 0.828                   | 99         | 400        | 0.664                              | 77         | 271        | 0.771             | 28         | 91         | 0.346             | 28         | 522        | 0.775             | 17         | 85         | 0.642            | 24         | 89         |
|                                          |                        | SAGE_Brain_astrocytoma_grade_III_B_439   | bulk                     | 0.810                   | 99         | 390        | 0.725                              | 77         | 266        | 0.732             | 28         | 134        | 0.582             | 28         | 266        | 0.868             | 17         | 74         | 0.614            | 24         | 79         |
|                                          |                        | SAGE_Brain_astrocytoma_grade_III_B_584   | bulk                     | 0.757                   | 99         | 485        | 0.757                              | 77         | 253        | 0.719             | 28         | 132        | 0.574             | 28         | 259        | 0.813             | 17         | 60         | 0.626            | 24         | 73         |
|                                          |                        | SAGE_Brain_astrocytoma_grade_III_B_828   | bulk                     | 0.778                   | 99         | 468        | 0.742                              | 77         | 213        | 0.735             | 28         | 146        | 0.675             | 28         | 236        | 0.742             | 17         | 51         | 0.654            | 24         | 78         |
|                                          |                        | SAGE_Brain_astrocytoma_grade_III_B_H1020 | bulk                     | 0.806                   | 99         | 218        | 0.537                              | 77         | 253        | 0.842             | 28         | 54         | 0.587             | 28         | 126        | 0.644             | 17         | 17         | 0.711            | 24         | 43         |
|                                          |                        | SAGE_Brain_astrocytoma_grade_III_B_H1055 | bulk                     | 0.815                   | 99         | 469        | 0.731                              | 77         | 308        | 0.690             | 28         | 146        | 0.709             | 28         | 281        | 0.867             | 17         | 81         | 0.651            | 24         | 91         |
|                                          |                        | SAGE_Brain_astrocytoma_grade_III_B_H1272 | bulk                     | 0.825                   | 99         | 471        | 0.790                              | 77         | 251        | 0.851             | 28         | 96         | 0.634             | 28         | 187        | 0.797             | 17         | 40         | 0.748            | 24         | 86         |
|                                          |                        | SAGE_Brain_astrocytoma_grade_III_B_H1970 | bulk                     | 0.800                   | 99         | 519        | 0.743                              | 77         | 284        | 0.779             | 28         | 114        | 0.565             | 28         | 257        | 0.813             | 17         | 80         | 0.682            | 24         | 90         |
|                                          |                        | SAGE_Brain_astrocytoma_grade_III_B_R140  | bulk                     | 0.848                   | 99         | 504        | 0.778                              | 77         | 303        | 0.687             | 28         | 168        | 0.712             | 28         | 197        | 0.810             | 17         | 117        | 0.725            | 24         | 104        |
|                                          |                        | SAGE_Brain_astrocytoma_grade_III_B_R927  | bulk                     | 0.827                   | 99         | 474        | 0.763                              | 77         | 293        | 0.807             | 28         | 164        | 0.723             | 28         | 203        | 0.653             | 17         | 93         | 0.605            | 24         | 156        |
|                                          |                        | SAGE_Brain_ependymoblastoma_B_819        | bulk                     | 0.751                   | 99         | 157        | 0.685                              | 77         | 83         | 0.703             | 28         | 23         | 0.669             | 28         | 121        | 0.719             | 17         | 17         | 0.592            | 24         | 32         |
|                                          |                        | SAGE_Brain_ependymoma_B_1150             | bulk                     | 0.771                   | 99         | 290        | 0.757                              | 77         | 196        | 0.708             | 28         | 102        | 0.773             | 28         | 167        | 0.849             | 17         | 56         | 0.775            | 24         | 67         |
|                                          |                        | SAGE_Brain_ependymoma_B_1394             | bulk                     | 0.815                   | 99         | 218        | 0.729                              | 77         | 132        | 0.695             | 28         | 85         | 0.711             | 28         | 131        | 0.717             | 17         | 27         | 0.760            | 24         | 45         |
|                                          |                        | SAGE_Brain_ependymoma_B_239              | bulk                     | 0.790                   | 99         | 161        | 0.709                              | 77         | 117        | 0.674             | 28         | 57         | 0.804             | 28         | 65         | 0.858             | 17         | 36         | 0.654            | 24         | 35         |
|                                          |                        | SAGE_Brain_ependymoma_B_H580             | bulk                     | 0.816                   | 99         | 259        | 0.655                              | 77         | 173        | 0.736             | 28         | 92         | 0.736             | 28         | 154        | 0.821             | 17         | 35         | 0.747            | 24         | 62         |
|                                          |                        | SAGE_Brain_ependymoma_B_R1023            | bulk                     | 0.762                   | 99         | 507        | 0.673                              | 77         | 400        | 0.764             | 28         | 128        | 0.696             | 28         | 312        | 0.886             | 17         | 62         | 0.632            | 24         | 102        |
|                                          |                        | SAGE_Brain_ependymoma_B_R353             | bulk                     | 0.820                   | 99         | 310        | 0.676                              | 77         | 228        | 0.806             | 28         | 78         | 0.776             | 28         | 144        | 0.746             | 17         | 46         | 0.678            | 24         | 43         |
|                                          |                        | SAGE_Brain_ependymoma_B_R455             | bulk                     | 0.770                   | 99         | 228        | 0.660                              | 77         | 102        | 0.775             | 28         | 47         | 0.710             | 28         | 110        | 0.792             | 17         | 36         | 0.649            | 24         | 43         |
|                                          |                        | SAGE_Brain_ependymoma_B_R510             | bulk                     | 0.802                   | 99         | 362        | 0.666                              | 77         | 335        | 0.774             | 28         | 103        | 0.714             | 28         | 188        | 0.881             | 17         | 52         | 0.730            | 24         | 71         |
|                                          |                        | SAGE_Brain_ependymoma_B_R512             | bulk                     | 0.785                   | 99         | 316        | 0.697                              | 77         | 221        | 0.824             | 28         | 66         | 0.713             | 28         | 154        | 0.809             | 17         | 38         | 0.686            | 24         | 57         |
|                                          |                        | SAGE_Brain_ependymoma_B_R582             | bulk                     | 0.777                   | 99         | 233        | 0.668                              | 77         | 116        | 0.687             | 28         | 44         | 0.596             | 28         | 111        | 0.806             | 17         | 30         | 0.734            | 24         | 45         |
|                                          |                        | SAGE_Brain_ependymoma_B_R628             | bulk                     | 0.776                   | 99         | 554        | 0.686                              | 77         | 402        | 0.795             | 28         | 133        | 0.705             | 28         | 241        | 0.870             | 17         | 71         | 0.741            | 24         | 97         |
|                                          |                        | SAGE_Brain_glioblastoma_B_GBM1062        | bulk                     | 0.703                   | 99         | 212        | 0.490                              | 77         | 131        | 0.707             | 28         | 43         | 0.595             | 28         | 53         | 0.716             | 17         | 23         | 0.642            | 24         | 36         |
|                                          |                        | SAGE_Brain_glioblastoma_B_H1110          | bulk                     | 0.756                   | 99         | 317        | 0.659                              | 77         | 244        | 0.822             | 28         | 98         | 0.513             | 28         | 270        | 0.750             | 17         | 41         | 0.677            | 24         | 55         |
|                                          |                        | SAGE_Brain_glioblastoma_B_H1353          | bulk                     | 0.807                   | 99         | 573        | 0.748                              | 77         | 306        | 0.829             | 28         | 166        | 0.688             | 28         | 238        | 0.858             | 17         | 107        | 0.689            | 24         | 117        |
|                                          |                        | SAGE_Brain_glioblastoma_B_H1371          | bulk                     | 0.821                   | 99         | 193        | 0.652                              | 77         | 93         | 0.720             | 28         | 38         | 0.643             | 28         | 74         | 0.758             | 17         | 30         | 0.730            | 24         | 30         |
|                                          |                        | SAGE_Brain_glioblastoma_B_H1425C         | bulk                     | 0.786                   | 99         | 383        | 0.737                              | 77         | 241        | 0.761             | 28         | 109        | 0.710             | 28         | 173        | 0.740             | 17         | 47         | 0.699            | 24         | 102        |
|                                          |                        | SAGE_Brain_glioblastoma_B_H833           | bulk                     | 0.793                   | 99         | 441        | 0.722                              | 77         | 229        | 0.800             | 28         | 110        | 0.704             | 28         | 182        | 0.793             | 17         | 56         | 0.671            | 24         | 73         |
|                                          |                        | SAGE_Brain_glioblastoma_B_pooled         | bulk                     | 0.714                   | 99         | 267        | 0.604                              | 77         | 201        | 0.736             | 28         | 51         | 0.478             | 28         | 216        | 0.777             | 17         | 17         | 0.675            | 24         | 35         |
|                                          |                        | SAGE_Brain_glioblastoma_B_R20            | bulk                     | 0.761                   | 99         | 570        | 0.735                              | 77         | 364        | 0.803             | 28         | 145        | 0.688             | 28         | 216        | 0.779             | 17         | 66         | 0.727            | 24         | 97         |
|                                          |                        | SAGE_Brain_glioblastoma_B_R336           | bulk                     | 0.750                   | 99         | 522        | 0.774                              | 77         | 233        | 0.729             | 28         | 126        | 0.437             | 28         | 433        | 0.766             | 17         | 89         | 0.781            | 24         | 100        |
|                                          |                        | SAGE_Brain_glioblastoma_B_R70            | bulk                     | 0.768                   | 99         | 470        | 0.768                              | 77         | 288        | 0.782             | 28         | 154        | 0.587             | 28         | 278        | 0.782             | 17         | 58         | 0.601            | 24         | 98         |
|                                          |                        | SAGE_Brain_meningioma_grade_II_B_SF2176  | bulk                     | 0.704                   | 99         | 161        | 0.329                              | 77         | 160        | 0.696             | 28         | 44         | 0.599             | 28         | 90         | 0.732             | 17         | 22         | 0.506            | 24         | 31         |
|                                          |                        | SAGE_Brain_meningioma_grade_II_B_SF3622  | bulk                     | 0.736                   | 99         | 191        | 0.397                              | 77         | 209        | 0.789             | 28         | 50         | 0.720             | 28         | 63         | 0.674             | 17         | 14         | 0.501            | 24         | 24         |
| SAGE_Brain_meningioma_grade_III_B_SF2366 | bulk                   | 0.769                                    | 99                       | 244                     | 0.468      | 77         | 250                                | 0.778      | 28         | 63                | 0.686      | 28         | 89                | 0.804      | 17         | 39                | 0.528      | 24         | 70               |            |            |
| SAGE_Brain_oligodendroglioma_B_1001      | bulk                   | 0.593                                    | 99                       | 195                     | 0.577      | 77         | 96                                 | 0.695      | 28         | 37                | 0.371      | 28         | 113               | 0.750      | 17         | 20                | 0.724      | 24         | 29               |            |            |
| SAGE_Brain_oligodendroglioma_B_H988      | bulk                   | 0.638                                    | 99                       | 124                     | 0.544      | 77         | 119                                | 0.604      | 28         | 23                | 0.322      | 28         | 113               | 0.718      | 17         | 17                | 0.680      | 24         | 24               |            |            |
| SAGE_Brain_glioblastoma_CS_TA2           | STC                    | 0.763                                    | 99                       | 196                     | 0.741      | 77         | 103                                | 0.783      | 28         | 50                | 0.782      | 28         | 94                | 0.604      | 17         | 17                | 0.641      | 24         | 36               |            |            |
| SAGE_Brain_glioblastoma_CL_H392          | cell line              | 0.692                                    | 99                       | 293                     | 0.580      | 77         | 209                                | 0.728      | 28         | 63                | 0.483      | 28         | 191               | 0.705      | 17         | 28                | 0.600      | 24         | 58               |            |            |
| SAGE_Brain_glioblastoma_CL_H54+EGFRvIII  | cell line              | 0.726                                    | 99                       | 321                     | 0.643      | 77         | 184                                | 0.722      | 28         | 68                | 0.474      | 28         | 188               | 0.540      | 17         | 15                | 0.633      | 24         | 43               |            |            |
| SAGE_Brain_glioblastoma_CL_H54+LacZ      | cell line              | 0.739                                    | 99                       | 365                     | 0.685      | 77         | 262                                | 0.742      | 28         | 122               | 0.557      | 28         | 159               | 0.524      | 17         | 27                | 0.746      | 24         | 53               |            |            |
| SAGE_Brain_glioblastoma_control_CL_H247  | cell line              | 0.775                                    | 99                       | 251                     | 0.718      | 77         | 202                                | 0.746      | 28         | 105               | 0.638      | 28         | 145               | 0.807      | 17         | 45                | 0.635      | 24         | 75               |            |            |
| SAGE_Brain_glioblastoma_hypoxia_CL_H247  | cell line              | 0.811                                    | 99                       | 330                     | 0.699      | 77         | 246                                | 0.673      | 28         | 94                | 0.540      | 28         | 163               | 0.853      | 17         | 37                | 0.711      | 24         | 75               |            |            |
| Normal                                   |                        | SAGE_Brain_normal_cortex_B_BB542         | bulk                     | 0.721                   | 99         | 557        | 0.692                              | 77         | 268        | 0.721             | 28         | 82         | 0.242             | 28         | 464        | 0.804             | 17         | 40         | 0.660            | 24         | 45         |
|                                          |                        | SAGE_Brain_normal_leptomeninges_B_AL2    | bulk                     | 0.794                   | 99         | 275        | 0.464                              | 77         | 323        | 0.726             | 28         | 57         | 0.644             | 28         | 115        | 0.767             | 17         | 37         | 0.602            | 24         | 54         |
|                                          |                        | SAGE_Brain_normal_peds_cortex_B_H1571    | bulk                     | 0.674                   | 99         | 599        | 0.711                              | 77         | 200        | 0.706             | 28         | 48         | 0.299             | 28         | 315        | 0.839             | 17         | 40         | 0.696            | 24         | 54         |
|                                          |                        | SAGE_Brain_normal_thalamus_B_1           | bulk                     | 0.528                   | 99         | 181        | 0.558                              | 77         | 63         | 0.649             | 28         | 10         | 0.137             | 28         | 153        | 0.592             | 17         | 9          | 0.727            | 24         | 13         |

Table S16. (Continued)

| Tissue <sup>a</sup>                        | Histology <sup>b</sup> | SAGE Library <sup>b</sup>               | Preparation <sup>b</sup> | Apoptosis <sup>cd</sup>                            |            |            | Chromosome stability <sup>cd</sup> |            |            | MMR <sup>cd</sup> |            |            | NER <sup>de</sup> |            |            | BER <sup>de</sup> |            |            | RRR <sup>cd</sup> |            |            |    |    |
|--------------------------------------------|------------------------|-----------------------------------------|--------------------------|----------------------------------------------------|------------|------------|------------------------------------|------------|------------|-------------------|------------|------------|-------------------|------------|------------|-------------------|------------|------------|-------------------|------------|------------|----|----|
|                                            |                        |                                         |                          | H $\alpha$                                         | M $\alpha$ | N $\alpha$ | H $\alpha$                         | M $\alpha$ | N $\alpha$ | H $\alpha$        | M $\alpha$ | N $\alpha$ | H $\alpha$        | M $\alpha$ | N $\alpha$ | H $\alpha$        | M $\alpha$ | N $\alpha$ | H $\alpha$        | M $\alpha$ | N $\alpha$ |    |    |
| Cerebellum                                 | Cancer                 | SAGE_Brain_medulloblastoma_B_1273       | bulk                     | 0.788                                              | 99         | 165        | 0.599                              | 77         | 183        | 0.755             | 28         | 69         | 0.660             | 28         | 68         | 0.781             | 17         | 22         | 0.559             | 24         | 40         |    |    |
|                                            |                        | SAGE_Brain_medulloblastoma_B_96-04-P019 | bulk                     | 0.747                                              | 99         | 225        | 0.725                              | 77         | 133        | 0.763             | 28         | 57         | 0.592             | 28         | 80         | 0.698             | 17         | 45         | 0.706             | 24         | 53         |    |    |
|                                            |                        | SAGE_Brain_medulloblastoma_B_97-05-P015 | bulk                     | 0.757                                              | 99         | 239        | 0.746                              | 77         | 150        | 0.788             | 28         | 64         | 0.783             | 28         | 80         | 0.689             | 17         | 54         | 0.718             | 24         | 55         |    |    |
|                                            |                        | SAGE_Brain_medulloblastoma_B_97-05-P312 | bulk                     | 0.828                                              | 99         | 256        | 0.659                              | 77         | 226        | 0.806             | 28         | 98         | 0.706             | 28         | 103        | 0.800             | 17         | 58         | 0.659             | 24         | 58         |    |    |
|                                            |                        | SAGE_Brain_medulloblastoma_B_98-04-P117 | bulk                     | 0.735                                              | 99         | 115        | 0.563                              | 77         | 89         | 0.713             | 28         | 48         | 0.620             | 28         | 38         | 0.636             | 17         | 38         | 0.656             | 24         | 31         |    |    |
|                                            |                        | SAGE_Brain_medulloblastoma_B_98-04-P494 | bulk                     | 0.719                                              | 99         | 162        | 0.763                              | 77         | 94         | 0.697             | 28         | 80         | 0.659             | 28         | 76         | 0.643             | 17         | 49         | 0.507             | 24         | 58         |    |    |
|                                            |                        | SAGE_Brain_medulloblastoma_B_98-05-P040 | bulk                     | 0.799                                              | 99         | 383        | 0.701                              | 77         | 215        | 0.763             | 28         | 112        | 0.741             | 28         | 142        | 0.659             | 17         | 78         | 0.657             | 24         | 92         |    |    |
|                                            |                        | SAGE_Brain_medulloblastoma_B_98-05-P608 | bulk                     | 0.768                                              | 99         | 227        | 0.759                              | 77         | 144        | 0.759             | 28         | 83         | 0.754             | 28         | 70         | 0.661             | 17         | 33         | 0.659             | 24         | 45         |    |    |
|                                            |                        | SAGE_Brain_medulloblastoma_B_98-09-P558 | bulk                     | 0.790                                              | 99         | 354        | 0.813                              | 77         | 180        | 0.737             | 28         | 138        | 0.804             | 28         | 142        | 0.713             | 17         | 76         | 0.680             | 24         | 113        |    |    |
|                                            |                        | SAGE_Brain_medulloblastoma_B_98-13-P301 | bulk                     | 0.771                                              | 99         | 169        | 0.691                              | 77         | 121        | 0.730             | 28         | 63         | 0.650             | 28         | 65         | 0.719             | 17         | 33         | 0.710             | 24         | 50         |    |    |
|                                            |                        | SAGE_Brain_medulloblastoma_B_C609       | bulk                     | 0.776                                              | 99         | 345        | 0.805                              | 77         | 193        | 0.811             | 28         | 109        | 0.780             | 28         | 113        | 0.805             | 17         | 88         | 0.714             | 24         | 99         |    |    |
|                                            |                        | SAGE_Brain_medulloblastoma_B_DL5        | bulk                     | 0.780                                              | 99         | 293        | 0.504                              | 77         | 374        | 0.814             | 28         | 90         | 0.798             | 28         | 117        | 0.684             | 17         | 67         | 0.486             | 24         | 67         |    |    |
|                                            |                        | SAGE_Brain_medulloblastoma_B_DL7        | bulk                     | 0.791                                              | 99         | 233        | 0.747                              | 77         | 177        | 0.772             | 28         | 89         | 0.731             | 28         | 99         | 0.626             | 17         | 87         | 0.657             | 24         | 64         |    |    |
|                                            |                        | SAGE_Brain_medulloblastoma_B_H1322      | bulk                     | 0.773                                              | 99         | 223        | 0.749                              | 77         | 181        | 0.727             | 28         | 98         | 0.722             | 28         | 134        | 0.695             | 17         | 20         | 0.737             | 24         | 75         |    |    |
|                                            |                        | SAGE_Brain_medulloblastoma_B_H1413      | bulk                     | 0.655                                              | 99         | 225        | 0.525                              | 77         | 196        | 0.752             | 28         | 55         | 0.334             | 28         | 214        | 0.555             | 17         | 50         | 0.603             | 24         | 58         |    |    |
|                                            |                        | SAGE_Brain_medulloblastoma_B_H275       | bulk                     | 0.704                                              | 99         | 257        | 0.847                              | 77         | 170        | 0.812             | 28         | 81         | 0.638             | 28         | 115        | 0.666             | 17         | 69         | 0.668             | 24         | 98         |    |    |
|                                            |                        | SAGE_Brain_medulloblastoma_B_H306       | bulk                     | 0.795                                              | 99         | 184        | 0.522                              | 77         | 245        | 0.709             | 28         | 57         | 0.702             | 28         | 85         | 0.687             | 17         | 52         | 0.715             | 24         | 45         |    |    |
|                                            |                        | SAGE_Brain_medulloblastoma_B_H484       | bulk                     | 0.790                                              | 99         | 202        | 0.749                              | 77         | 181        | 0.740             | 28         | 131        | 0.761             | 28         | 102        | 0.742             | 17         | 69         | 0.616             | 24         | 108        |    |    |
|                                            |                        | SAGE_Brain_medulloblastoma_B_H876       | bulk                     | 0.784                                              | 99         | 239        | 0.724                              | 77         | 173        | 0.805             | 28         | 64         | 0.775             | 28         | 63         | 0.647             | 17         | 64         | 0.645             | 24         | 93         |    |    |
|                                            |                        | SAGE_Brain_medulloblastoma_B_H972       | bulk                     | 0.762                                              | 99         | 313        | 0.808                              | 77         | 185        | 0.709             | 28         | 128        | 0.681             | 28         | 105        | 0.562             | 17         | 76         | 0.604             | 24         | 109        |    |    |
|                                            |                        | SAGE_Brain_medulloblastoma_CL_4-HCR     | cell line                | 0.715                                              | 99         | 288        | 0.713                              | 77         | 279        | 0.649             | 28         | 174        | 0.387             | 28         | 253        | 0.685             | 17         | 57         | 0.756             | 24         | 82         |    |    |
|                                            |                        | SAGE_Brain_medulloblastoma_CL_D283      | cell line                | 0.669                                              | 99         | 296        | 0.797                              | 77         | 274        | 0.794             | 28         | 153        | 0.269             | 28         | 419        | 0.671             | 17         | 52         | 0.758             | 24         | 92         |    |    |
|                                            |                        | SAGE_Brain_medulloblastoma_CL_H341      | cell line                | 0.743                                              | 99         | 123        | 0.717                              | 77         | 94         | 0.752             | 28         | 43         | 0.501             | 28         | 126        | 0.645             | 17         | 48         | 0.706             | 24         | 33         |    |    |
|                                            |                        | SAGE_Brain_medulloblastoma_CL_mhh-1     | cell line                | 0.744                                              | 99         | 185        | 0.726                              | 77         | 107        | 0.702             | 28         | 63         | 0.656             | 28         | 92         | 0.679             | 17         | 40         | 0.655             | 24         | 66         |    |    |
|                                            |                        | Normal                                  | Normal                   | SAGE_Brain_normal_cerebellum_B_1                   | bulk       | 0.752      | 99                                 | 250        | 0.677      | 77                | 204        | 0.754      | 28                | 40         | 0.531      | 28                | 112        | 0.801      | 17                | 15         | 0.711      | 24 | 41 |
|                                            |                        |                                         |                          | SAGE_Brain_normal_cerebellum_B_BB542               | bulk       | 0.689      | 99                                 | 211        | 0.699      | 77                | 122        | 0.756      | 28                | 27         | 0.318      | 28                | 137        | 0.740      | 17                | 16         | 0.738      | 24 | 27 |
|                                            |                        | Breast                                  | Cancer                   | SAGE_Breast_carcinoma_B_95-259                     | bulk       | 0.628      | 99                                 | 170        | 0.585      | 77                | 146        | 0.734      | 28                | 27         | 0.585      | 28                | 62         | 0.828      | 17                | 26         | 0.644      | 24 | 50 |
|                                            |                        |                                         |                          | SAGE_Breast_carcinoma_B_95-347                     | bulk       | 0.760      | 99                                 | 268        | 0.517      | 77                | 289        | 0.743      | 28                | 66         | 0.536      | 28                | 169        | 0.780      | 17                | 47         | 0.616      | 24 | 46 |
|                                            |                        |                                         |                          | SAGE_Breast_carcinoma_B_DCIS-4                     | bulk       | 0.754      | 99                                 | 290        | 0.541      | 77                | 176        | 0.751      | 28                | 54         | 0.575      | 28                | 110        | 0.795      | 17                | 39         | 0.669      | 24 | 58 |
|                                            |                        |                                         |                          | SAGE_Breast_carcinoma_B_DCIS-5                     | bulk       | 0.736      | 99                                 | 230        | 0.544      | 77                | 134        | 0.685      | 28                | 35         | 0.457      | 28                | 97         | 0.765      | 17                | 24         | 0.699      | 24 | 43 |
|                                            |                        |                                         |                          | SAGE_Breast_carcinoma_B_IDC-3                      | bulk       | 0.750      | 99                                 | 343        | 0.627      | 77                | 200        | 0.787      | 28                | 81         | 0.612      | 28                | 134        | 0.771      | 17                | 58         | 0.755      | 24 | 81 |
|                                            |                        |                                         |                          | SAGE_Breast_carcinoma_B_IDC-4                      | bulk       | 0.774      | 99                                 | 291        | 0.656      | 77                | 210        | 0.751      | 28                | 92         | 0.699      | 28                | 104        | 0.748      | 17                | 40         | 0.622      | 24 | 90 |
|                                            |                        |                                         |                          | SAGE_Breast_carcinoma_B_IDC-5                      | bulk       | 0.772      | 99                                 | 268        | 0.573      | 77                | 169        | 0.762      | 28                | 49         | 0.535      | 28                | 136        | 0.769      | 17                | 63         | 0.706      | 24 | 76 |
|                                            |                        |                                         |                          | SAGE_Breast_carcinoma_metastasis_B_2               | bulk       | 0.682      | 99                                 | 254        | 0.611      | 77                | 210        | 0.692      | 28                | 77         | 0.682      | 28                | 83         | 0.802      | 17                | 43         | 0.633      | 24 | 40 |
|                                            |                        |                                         |                          | SAGE_Breast_metastatic_carcinoma_B_95-260          | bulk       | 0.655      | 99                                 | 209        | 0.649      | 77                | 123        | 0.661      | 28                | 49         | 0.557      | 28                | 64         | 0.652      | 17                | 30         | 0.671      | 24 | 50 |
|                                            |                        |                                         |                          | SAGE_Breast_metastatic_carcinoma_B_95-348          | bulk       | 0.715      | 99                                 | 279        | 0.650      | 77                | 207        | 0.773      | 28                | 79         | 0.655      | 28                | 116        | 0.766      | 17                | 47         | 0.634      | 24 | 54 |
|                                            |                        |                                         |                          | SAGE_Breast_carcinoma_MD_DCIS                      | MD         | 0.754      | 99                                 | 145        | 0.612      | 77                | 90         | 0.719      | 28                | 55         | 0.624      | 28                | 65         | 0.690      | 17                | 17         | 0.570      | 24 | 23 |
|                                            |                        |                                         |                          | SAGE_Breast_carcinoma_epithelium_AP_DCIS-2         | AP         | 0.781      | 99                                 | 308        | 0.463      | 77                | 226        | 0.756      | 28                | 46         | 0.332      | 28                | 191        | 0.755      | 17                | 45         | 0.581      | 24 | 36 |
|                                            |                        |                                         |                          | SAGE_Breast_carcinoma_epithelium_AP_DCIS-3         | AP         | 0.816      | 99                                 | 212        | 0.211      | 77                | 1112       | 0.752      | 28                | 58         | 0.319      | 28                | 167        | 0.699      | 17                | 26         | 0.837      | 24 | 48 |
|                                            |                        |                                         |                          | SAGE_Breast_carcinoma_epithelium_AP_DCIS6          | AP         | 0.818      | 99                                 | 327        | 0.340      | 77                | 659        | 0.787      | 28                | 75         | 0.387      | 28                | 232        | 0.755      | 17                | 31         | 0.732      | 24 | 58 |
|                                            |                        |                                         |                          | SAGE_Breast_carcinoma_epithelium_AP_DCIS7          | AP         | 0.745      | 99                                 | 705        | 0.493      | 77                | 461        | 0.811      | 28                | 82         | 0.287      | 28                | 437        | 0.808      | 17                | 55         | 0.768      | 24 | 39 |
| SAGE_Breast_carcinoma_CL_MCF7control_0h    | cell line              |                                         |                          | 0.749                                              | 99         | 212        | 0.715                              | 77         | 106        | 0.618             | 28         | 150        | 0.591             | 28         | 137        | 0.400             | 17         | 126        | 0.659             | 24         | 48         |    |    |
| SAGE_Breast_carcinoma_CL_MCF7estradiol_10H | cell line              |                                         |                          | 0.780                                              | 99         | 239        | 0.800                              | 77         | 160        | 0.537             | 28         | 159        | 0.613             | 28         | 171        | 0.610             | 17         | 97         | 0.639             | 24         | 105        |    |    |
| SAGE_Breast_carcinoma_CL_MCF7estradiol_3h  | cell line              |                                         |                          | 0.774                                              | 99         | 235        | 0.757                              | 77         | 111        | 0.611             | 28         | 161        | 0.587             | 28         | 186        | 0.598             | 17         | 77         | 0.651             | 24         | 68         |    |    |
| SAGE_Breast_carcinoma_CL_MDA435C           | cell line              |                                         |                          | 0.742                                              | 99         | 232        | 0.742                              | 77         | 169        | 0.780             | 28         | 82         | 0.687             | 28         | 84         | 0.679             | 17         | 25         | 0.496             | 24         | 88         |    |    |
| SAGE_Breast_carcinoma_CL_MDA435H24         | cell line              |                                         |                          | 0.765                                              | 99         | 249        | 0.731                              | 77         | 189        | 0.784             | 28         | 71         | 0.657             | 28         | 87         | 0.806             | 17         | 28         | 0.627             | 24         | 92         |    |    |
| SAGE_Breast_carcinoma_CL_MDA435H48         | cell line              |                                         |                          | 0.734                                              | 99         | 226        | 0.716                              | 77         | 137        | 0.709             | 28         | 42         | 0.667             | 28         | 68         | 0.813             | 17         | 24         | 0.597             | 24         | 67         |    |    |
| SAGE_Breast_carcinoma_CL_ZR75_1_estrone    | cell line              |                                         |                          | 0.594                                              | 99         | 152        | 0.441                              | 77         | 136        | 0.575             | 28         | 76         | 0.479             | 28         | 29         | 0.514             | 17         | 16         | 0.550             | 24         | 15         |    |    |
| SAGE_Breast_carcinoma_CL_ZR75_1_tamoxifen  | cell line              |                                         |                          | 0.608                                              | 99         | 204        | 0.491                              | 77         | 192        | 0.676             | 28         | 98         | 0.465             | 28         | 62         | 0.496             | 17         | 21         | 0.492             | 24         | 15         |    |    |
| SAGE_Breast_carcinoma_CL_ZR75_1_untreated  | cell line              |                                         |                          | 0.617                                              | 99         | 132        | 0.456                              | 77         | 133        | 0.509             | 28         | 85         | 0.586             | 28         | 39         | 0.480             | 17         | 20         | 0.550             | 24         | 14         |    |    |
| Normal                                     | Normal                 |                                         |                          | SAGE_Breast_normal_epithelium_AP_1                 | AP         | 0.670      | 99                                 | 316        | 0.514      | 77                | 197        | 0.752      | 28                | 46         | 0.410      | 28                | 134        | 0.632      | 17                | 25         | 0.795      | 24 | 30 |
|                                            |                        |                                         |                          | SAGE_Breast_normal_epithelium_AP_Br_N              | AP         | 0.670      | 99                                 | 361        | 0.473      | 77                | 160        | 0.688      | 28                | 38         | 0.444      | 28                | 104        | 0.663      | 17                | 20         | 0.685      | 24 | 25 |
|                                            |                        |                                         |                          | SAGE_Breast_normal_myoepithelium_AP_myoepithelial1 | AP         | 0.804      | 99                                 | 325        | 0.563      | 77                | 209        | 0.663      | 28                | 47         | 0.447      | 28                | 82         | 0.793      | 17                | 24         | 0.592      | 24 | 50 |
|                                            |                        |                                         |                          | SAGE_Breast_normal_stroma_AP_1                     | AP         | 0.652      | 99                                 | 434        | 0.707      | 77                | 137        | 0.789      | 28                | 65         | 0.652      | 28                | 97         | 0.789      | 17                | 39         | 0.650      | 24 | 46 |
|                                            |                        |                                         |                          | SAGE_Breast_normal_organoid_B                      | bulk       | 0.554      | 99                                 | 646        | 0.633      | 77                | 121        | 0.765      | 28                | 41         | 0.513      | 28                | 66         | 0.553      | 17                | 21         | 0.522      | 24 | 47 |
| Colon                                      | Cancer                 |                                         |                          | SAGE_Colon_adenocarcinoma_B_Tu102                  | bulk       | 0.642      | 99                                 | 302        | 0.436      | 77                | 232        | 0.844      | 28                | 50         | 0.084      | 28                | 577        | 0.677      | 17                | 24         | 0.756      | 24 | 50 |
|                                            |                        |                                         |                          | SAGE_Colon_adenocarcinoma_B_Tu98                   | bulk       | 0.596      | 99                                 | 279        | 0.432      | 77                | 221        | 0.706      | 28                | 50         | 0.178      | 28                | 352        | 0.689      | 17                | 21         | 0.707      | 24 | 34 |
|                                            |                        |                                         |                          | SAGE_Colon_adenocarcinoma_CL_Caco2                 | cell line  | 0.665      | 99                                 | 316        | 0.693      | 77                | 239        | 0.744      | 28                | 128        | 0.359      | 28                | 337        | 0.809      | 17                | 39         | 0.709      | 24 | 76 |
|                                            |                        | SAGE_Colon_adenocarcinoma_CL_HCT116     | cell line                | 0.727                                              | 99         | 269        | 0.689                              | 77         | 232        | 0.678             | 28         | 75         | 0.681             | 28         | 155        | 0.795             | 17         | 30         | 0.66              |            |            |    |    |

Table S16. (Continued)

| Tissue <sup>a</sup> | Histology <sup>b</sup> | SAGE Library <sup>b</sup>                    | Preparation <sup>b</sup> | Apoptosis <sup>cd</sup> |            |            | Chromosome stability <sup>cd</sup> |            |            | MMR <sup>cd</sup> |            |            | NER <sup>de</sup> |            |            | BER <sup>de</sup> |            |            | RER <sup>cd</sup> |            |            |
|---------------------|------------------------|----------------------------------------------|--------------------------|-------------------------|------------|------------|------------------------------------|------------|------------|-------------------|------------|------------|-------------------|------------|------------|-------------------|------------|------------|-------------------|------------|------------|
|                     |                        |                                              |                          | H $\alpha$              | M $\alpha$ | N $\alpha$ | H $\alpha$                         | M $\alpha$ | N $\alpha$ | H $\alpha$        | M $\alpha$ | N $\alpha$ | H $\alpha$        | M $\alpha$ | N $\alpha$ | H $\alpha$        | M $\alpha$ | N $\alpha$ | H $\alpha$        | M $\alpha$ | N $\alpha$ |
| Liver               | Cancer                 | SAGE_Liver_cholangiocarcinoma_B_K1           | bulk                     | 0.798                   | 99         | 194        | 0.409                              | 77         | 475        | 0.861             | 28         | 64         | 0.729             | 28         | 61         | 0.647             | 17         | 28         | 0.795             | 24         | 46         |
|                     |                        | SAGE_Liver_cholangiocarcinoma_B_K2D          | bulk                     | 0.788                   | 99         | 238        | 0.710                              | 77         | 136        | 0.740             | 28         | 55         | 0.712             | 28         | 67         | 0.707             | 17         | 25         | 0.659             | 24         | 57         |
|                     |                        | SAGE_Liver_cholangiocarcinoma_CL_K3          | cell line                | 0.671                   | 99         | 246        | 0.637                              | 77         | 118        | 0.786             | 28         | 45         | 0.693             | 28         | 66         | 0.627             | 17         | 43         | 0.620             | 24         | 41         |
|                     |                        | SAGE_Liver_cholangiocarcinoma_CL_K4          | cell line                | 0.598                   | 99         | 267        | 0.598                              | 77         | 88         | 0.711             | 28         | 43         | 0.650             | 28         | 53         | 0.601             | 17         | 36         | 0.509             | 24         | 41         |
| Lung                | Cancer                 | SAGE_Liver_normal_B_1                        | bulk                     | 0.778                   | 99         | 181        | 0.692                              | 77         | 70         | 0.649             | 28         | 33         | 0.591             | 28         | 77         | 0.752             | 17         | 27         | 0.690             | 24         | 38         |
|                     |                        | SAGE_Lung_adenocarcinoma_MD_L10              | MD                       | 0.848                   | 99         | 384        | 0.653                              | 77         | 269        | 0.802             | 28         | 95         | 0.785             | 28         | 106        | 0.751             | 17         | 52         | 0.784             | 24         | 82         |
| Ovary               | Cancer                 | SAGE_Lung_adenocarcinoma_MD_L9               | MD                       | 0.804                   | 99         | 146        | 0.687                              | 77         | 109        | 0.691             | 28         | 49         | 0.740             | 28         | 45         | 0.662             | 17         | 18         | 0.680             | 24         | 26         |
|                     |                        | SAGE_Lung_normal_B_1                         | bulk                     | 0.754                   | 99         | 490        | 0.657                              | 77         | 168        | 0.690             | 28         | 96         | 0.710             | 28         | 103        | 0.717             | 17         | 51         | 0.649             | 24         | 85         |
| Pancreas            | Cancer                 | SAGE_Ovary_adenocarcinoma_B_OVT-6            | bulk                     | 0.695                   | 99         | 256        | 0.668                              | 77         | 117        | 0.671             | 28         | 47         | 0.388             | 28         | 123        | 0.739             | 17         | 24         | 0.620             | 24         | 37         |
|                     |                        | SAGE_Ovary_adenocarcinoma_B_OVT-7            | bulk                     | 0.705                   | 99         | 288        | 0.728                              | 77         | 150        | 0.775             | 28         | 91         | 0.574             | 28         | 120        | 0.691             | 17         | 32         | 0.697             | 24         | 45         |
|                     |                        | SAGE_Ovary_adenocarcinoma_B_OVT-8            | bulk                     | 0.765                   | 99         | 198        | 0.681                              | 77         | 117        | 0.796             | 28         | 41         | 0.588             | 28         | 73         | 0.723             | 17         | 25         | 0.745             | 24         | 31         |
|                     |                        | SAGE_Ovary_carcinoma_CL_A2780                | cell line                | 0.764                   | 99         | 84         | 0.722                              | 77         | 86         | 0.721             | 28         | 52         | 0.681             | 28         | 51         | 0.694             | 17         | 23         | 0.601             | 24         | 43         |
|                     |                        | SAGE_Ovary_carcinoma_CL_ES2-1                | cell line                | 0.757                   | 99         | 119        | 0.726                              | 77         | 81         | 0.654             | 28         | 48         | 0.746             | 28         | 53         | 0.636             | 17         | 20         | 0.535             | 24         | 30         |
|                     |                        | SAGE_Ovary_normal_CS_HOSE_4                  | STC                      | 0.688                   | 99         | 367        | 0.707                              | 77         | 77         | 0.647             | 28         | 34         | 0.654             | 28         | 71         | 0.639             | 17         | 14         | 0.541             | 24         | 45         |
| Peritoneum          | Cancer                 | SAGE_Pancreas_adenocarcinoma_B_91-16113      | bulk                     | 0.751                   | 99         | 177        | 0.540                              | 77         | 115        | 0.599             | 28         | 19         | 0.300             | 28         | 154        | 0.550             | 17         | 8          | 0.637             | 24         | 24         |
|                     |                        | SAGE_Pancreas_adenocarcinoma_B_96-6252       | bulk                     | 0.789                   | 99         | 151        | 0.552                              | 77         | 110        | 0.700             | 28         | 21         | 0.319             | 28         | 167        | 0.780             | 17         | 15         | 0.667             | 24         | 21         |
|                     |                        | SAGE_Pancreas_adenocarcinoma_CL_CAPANI       | cell line                | 0.721                   | 99         | 170        | 0.617                              | 77         | 134        | 0.704             | 28         | 68         | 0.559             | 28         | 115        | 0.837             | 17         | 18         | 0.684             | 24         | 38         |
|                     |                        | SAGE_Pancreas_adenocarcinoma_CL_Panc1        | cell line                | 0.572                   | 99         | 168        | 0.608                              | 77         | 115        | 0.697             | 28         | 27         | 0.669             | 28         | 58         | 0.695             | 17         | 14         | 0.622             | 24         | 29         |
|                     |                        | SAGE_Pancreas_carcinoma_CL_ASPC              | cell line                | 0.641                   | 99         | 170        | 0.643                              | 77         | 73         | 0.544             | 28         | 26         | 0.292             | 28         | 141        | 0.596             | 17         | 23         | 0.574             | 24         | 21         |
|                     |                        | SAGE_Pancreas_carcinoma_CL_PL45              | cell line                | 0.717                   | 99         | 179        | 0.611                              | 77         | 75         | 0.779             | 28         | 29         | 0.430             | 28         | 93         | 0.660             | 17         | 14         | 0.660             | 24         | 30         |
| Prostate            | Cancer                 | SAGE_Pancreas_normal_CS_H126                 | STC                      | 0.735                   | 99         | 131        | 0.599                              | 77         | 138        | 0.741             | 28         | 35         | 0.599             | 28         | 113        | 0.715             | 17         | 10         | 0.723             | 24         | 32         |
|                     |                        | SAGE_Pancreas_normal_CS_HX                   | STC                      | 0.748                   | 99         | 114        | 0.592                              | 77         | 131        | 0.665             | 28         | 21         | 0.591             | 28         | 127        | 0.716             | 17         | 18         | 0.605             | 24         | 30         |
| Prostate            | Cancer                 | SAGE_Peritoneum_mesothelioma_B_12            | bulk                     | 0.749                   | 99         | 155        | 0.679                              | 77         | 95         | 0.760             | 28         | 32         | 0.507             | 28         | 103        | 0.562             | 17         | 14         | 0.538             | 24         | 25         |
|                     |                        | SAGE_Peritoneum_normal_B_13                  | bulk                     | 0.663                   | 99         | 481        | 0.549                              | 77         | 175        | 0.671             | 28         | 28         | 0.476             | 28         | 100        | 0.748             | 17         | 17         | 0.521             | 24         | 38         |
|                     |                        | SAGE_Prostate_carcinoma_B_LN-1               | bulk                     | 0.606                   | 99         | 123        | 0.444                              | 77         | 90         | 0.604             | 28         | 23         | 0.746             | 28         | 24         | 0.687             | 17         | 7          | 0.671             | 24         | 16         |
|                     |                        | SAGE_Prostate_carcinoma_B_pool2              | bulk                     | 0.745                   | 99         | 273        | 0.593                              | 77         | 152        | 0.724             | 28         | 60         | 0.482             | 28         | 252        | 0.798             | 17         | 46         | 0.730             | 24         | 51         |
|                     |                        | SAGE_Prostate_adenocarcinoma_MD_PR317        | MD                       | 0.733                   | 99         | 282        | 0.682                              | 77         | 85         | 0.788             | 28         | 54         | 0.546             | 28         | 125        | 0.668             | 17         | 38         | 0.531             | 24         | 61         |
|                     |                        | SAGE_Prostate_adenocarcinoma_CL_LNcAp        | cell line                | 0.657                   | 99         | 106        | 0.637                              | 77         | 85         | 0.666             | 28         | 49         | 0.567             | 28         | 85         | 0.642             | 17         | 13         | 0.751             | 24         | 22         |
|                     |                        | SAGE_Prostate_carcinoma_CL_A+                | cell line                | 0.718                   | 99         | 186        | 0.655                              | 77         | 76         | 0.677             | 28         | 26         | 0.597             | 28         | 43         | 0.686             | 17         | 22         | 0.724             | 24         | 19         |
|                     |                        | SAGE_Prostate_carcinoma_CL_LNcAp             | cell line                | 0.774                   | 99         | 231        | 0.641                              | 77         | 152        | 0.692             | 28         | 57         | 0.501             | 28         | 243        | 0.584             | 17         | 38         | 0.680             | 24         | 51         |
|                     |                        | SAGE_Prostate_carcinoma_CL_LNcAp_no-DHT      | cell line                | 0.668                   | 99         | 271        | 0.566                              | 77         | 178        | 0.781             | 28         | 72         | 0.647             | 28         | 164        | 0.736             | 17         | 47         | 0.640             | 24         | 43         |
|                     |                        | SAGE_Prostate_carcinoma_CL_LNcAp-C           | cell line                | 0.717                   | 99         | 266        | 0.690                              | 77         | 139        | 0.642             | 28         | 49         | 0.506             | 28         | 141        | 0.738             | 17         | 18         | 0.673             | 24         | 40         |
|                     |                        | SAGE_Prostate_carcinoma_CL_LNcAp-T           | cell line                | 0.723                   | 99         | 267        | 0.655                              | 77         | 124        | 0.744             | 28         | 61         | 0.435             | 28         | 172        | 0.835             | 17         | 25         | 0.642             | 24         | 41         |
|                     |                        | SAGE_Prostate_carcinoma_CL_PC3_AS2           | cell line                | 0.851                   | 99         | 171        | 0.600                              | 77         | 176        | 0.684             | 28         | 55         | 0.638             | 28         | 87         | 0.674             | 17         | 22         | 0.771             | 24         | 42         |
|                     |                        | SAGE_Prostate_carcinoma_CL_PC3_Mock          | cell line                | 0.748                   | 99         | 181        | 0.695                              | 77         | 130        | 0.681             | 28         | 107        | 0.587             | 28         | 152        | 0.668             | 17         | 34         | 0.584             | 24         | 49         |
| Skin                | Cancer                 | SAGE_Prostate_normal_epithelium_CS_confluent | STC                      | 0.762                   | 99         | 219        | 0.579                              | 77         | 93         | 0.652             | 28         | 39         | 0.692             | 28         | 77         | 0.733             | 17         | 37         | 0.800             | 24         | 30         |
|                     |                        | SAGE_Prostate_normal_epithelium_CS_senescent | STC                      | 0.807                   | 99         | 189        | 0.574                              | 77         | 86         | 0.661             | 28         | 39         | 0.672             | 28         | 115        | 0.720             | 17         | 21         | 0.567             | 24         | 27         |
|                     |                        | SAGE_Prostate_normal_MD_PR317                | MD                       | 0.784                   | 99         | 246        | 0.704                              | 77         | 89         | 0.742             | 28         | 49         | 0.682             | 28         | 116        | 0.768             | 17         | 39         | 0.530             | 24         | 49         |
|                     |                        | SAGE_Prostate_normal_B_2                     | bulk                     | 0.756                   | 99         | 273        | 0.685                              | 77         | 150        | 0.679             | 28         | 85         | 0.467             | 28         | 215        | 0.813             | 17         | 39         | 0.663             | 24         | 47         |
|                     |                        | SAGE_Skin_melanoma_B_DB1                     | bulk                     | 0.596                   | 99         | 104        | 0.239                              | 77         | 306        | 0.743             | 28         | 17         | 0.583             | 28         | 34         | 0.602             | 17         | 12         | 0.627             | 24         | 35         |
|                     |                        | SAGE_Skin_melanoma_B_DB2                     | bulk                     | 0.604                   | 99         | 212        | 0.515                              | 77         | 194        | 0.673             | 28         | 42         | 0.746             | 28         | 55         | 0.792             | 17         | 21         | 0.560             | 24         | 38         |
| Stomach             | Cancer                 | SAGE_Skin_melanoma_B_DB3                     | bulk                     | -                       | -          | -          | -                                  | -          | -          | -                 | -          | -          | -                 | -          | -          | -                 | -          | -          | -                 | -          | -          |
|                     |                        | SAGE_Skin_normal_B_NS                        | bulk                     | 0.691                   | 99         | 187        | 0.322                              | 77         | 197        | 0.654             | 28         | 28         | 0.435             | 28         | 72         | 0.652             | 17         | 11         | 0.618             | 24         | 24         |
|                     |                        | SAGE_Stomach_adenocarcinoma_B_G234           | bulk                     | 0.801                   | 99         | 320        | 0.708                              | 77         | 163        | 0.579             | 28         | 111        | 0.364             | 28         | 223        | 0.799             | 17         | 17         | 0.702             | 24         | 59         |
|                     |                        | SAGE_Stomach_carcinoma_B_G189                | bulk                     | 0.749                   | 99         | 254        | 0.775                              | 77         | 101        | 0.607             | 28         | 96         | 0.581             | 28         | 114        | 0.628             | 17         | 37         | 0.701             | 24         | 61         |
|                     |                        | SAGE_Stomach_carcinoma_B_xenograft_X101      | bulk                     | 0.641                   | 99         | 446        | 0.698                              | 77         | 160        | 0.702             | 28         | 96         | 0.433             | 28         | 246        | 0.790             | 17         | 34         | 0.737             | 24         | 37         |
|                     |                        | SAGE_Stomach_carcinoma_B_xenograft_X43       | bulk                     | 0.620                   | 99         | 367        | 0.732                              | 77         | 138        | 0.658             | 28         | 83         | 0.321             | 28         | 215        | 0.762             | 17         | 19         | 0.735             | 24         | 59         |
|                     |                        | SAGE_Stomach_adenocarcinoma_MD_G329          | MD                       | 0.718                   | 99         | 265        | 0.642                              | 77         | 120        | 0.653             | 28         | 44         | 0.407             | 28         | 139        | 0.678             | 17         | 17         | 0.684             | 24         | 49         |
|                     |                        | SAGE_Stomach_adenocarcinoma_MD_HG7           | MD                       | 0.744                   | 99         | 505        | 0.715                              | 77         | 278        | 0.647             | 28         | 179        | 0.569             | 28         | 244        | 0.784             | 17         | 61         | 0.825             | 24         | 61         |
|                     |                        | SAGE_Stomach_adenocarcinoma_MD_HS29          | MD                       | 0.746                   | 99         | 343        | 0.717                              | 77         | 158        | 0.736             | 28         | 68         | 0.454             | 28         | 144        | 0.776             | 17         | 29         | 0.701             | 24         | 74         |
|                     |                        | SAGE_Stomach_normal_MD_13S                   | MD                       | 0.392                   | 99         | 291        | 0.708                              | 77         | 66         | 0.665             | 28         | 33         | 0.270             | 28         | 180        | 0.673             | 17         | 12         | 0.757             | 24         | 19         |
|                     |                        | SAGE_Stomach_normal_MD_14S                   | MD                       | 0.670                   | 99         | 342        | 0.758                              | 77         | 99         | 0.761             | 28         | 49         | 0.313             | 28         | 255        | 0.733             | 17         | 26         | 0.651             | 24         | 55         |
|                     |                        | SAGE_Stomach_normal_B_antrum                 | bulk                     | 0.636                   | 99         | 122        | 0.606                              | 77         | 30         | 0.543             | 28         | 25         | 0.185             | 28         | 89         | 0.576             | 17         | 12         | 0.613             | 24         | 20         |
|                     |                        | SAGE_Stomach_normal_epithelium_B_body1       | bulk                     | 0.391                   | 99         | 196        | 0.567                              | 77         | 27         | 0.442             | 28         | 12         | 0.175             | 28         | 99         | 0.357             | 17         | 6          | 0.327             | 24         | 4          |
| Thyroid             | Cancer                 | SAGE_Thyroid_follicular_carcinoma_B_TT004    | bulk                     | 0.766                   | 99         | 497        | 0.744                              | 77         | 260        | 0.753             | 28         | 138        | 0.827             | 28         | 175        | 0.697             | 17         | 63         | 0.634             | 24         | 161        |
|                     |                        | SAGE_Thyroid_normal_B_001                    | bulk                     | 0.807                   | 99         | 440        | 0.708                              | 77         | 238        | 0.727             | 28         | 130        | 0.710             | 28         | 228        | 0.749             | 17         | 78         | 0.678             | 24         | 128        |

<sup>a</sup> The skin library "SAGE\_Skin\_melanoma\_B\_DB3" is not integrated with SAGE Absolute Level Lister (SALL) tool and, therefore, could not be retrieved for tag-to-gene analysis. Cerebellum tissue libraries are retrieved by specific access in CGAP search tools and, therefore, are analyzed separately from brain tissue.

<sup>b</sup> List of SAGE libraries selected based on the search criteria: tag length (short 10bp); tissue preparation [bulk, short term culture (STC), antibody purified (ABP) or microscope dissected (MCD)]; and tissue histology (cancer or normal). The list contains only libraries that had at least one matched pair cancer/normal (e.g. one cancer and one equivalent normal tissue library).

<sup>c</sup> H $\alpha$  = diversity of tags; M $\alpha$  = number of unique tags; N $\alpha$  = number of tags (for details, material and methods).

<sup>d</sup> We consider each expression pathways as a specific group of genes (e.g. group of UniGene ids), which are presented in Tables S1 to S10. Therefore, the diversity H $\alpha$  of each SAGE library was obtained for groups of UniGene clusters, as described in material and methods. Mismatch repair (MMR); nucleotide-excision repair (NER); base-excision repair (BER); recombinational repair (RER).

## Supplementary References

1. Kanehisa, M., Goto, S., Hattori, M., Aoki-Kinoshita, K.F., Itoh, M., Kawashima, S., Katayama, T., Araki, M. and Hirakawa, M. (2006) From genomics to chemical genomics: new developments in KEGG. *Nucl.Acids Res.*, **34**, D354-D357.
2. Wang, Z.H., Cummins, J.M., Shen, D., Cahill, D.P., Jallepalli, P.V., Wang, T.L., Parsons, D.W., Traverso, G., Awad, M., Silliman, N. *et al.* (2004) Three classes of genes mutated in colorectal cancers with chromosomal instability. *Cancer Res.*, **64**, 2998-3001.
3. Wood, R.D., Mitchell, M. and Lindahl, T. (2005) Human DNA repair genes, 2005. *Mutation Res.*, **577**, 275-283.
4. Jiricny, J. (2006) The multifaceted mismatch-repair system. *Nat. Rev. Mol. Cell Biol.*, **7**, 335-346.
5. von Mering, C., Jensen, L.J., Snel, B., Hooper, S.D., Krupp, M., Foglierini, M., Jouffre, N., Huynen, M.A. and Bork, P. (2005) STRING: known and predicted protein-protein associations, integrated and transferred across organisms. *Nucl.Acids Res.*, **33**, D433-D437.
6. Futreal, P.A., Coin, L., Marshall, M., Down, T., Hubbard, T., Wooster, R., Rahman, N. and Stratton, M.R. (2004) A census of human cancer genes. *Nat. Rev. Cancer*, **4**, 177-183.
7. Wain, H.M., Lush, M.J., Ducluzeau, F., Khodiyar, V.K. and Povey, S. (2004) Genew: the Human Gene Nomenclature Database, 2004 updates. *Nucl.Acids Res.*, **32**, D255-D257.
8. Wheeler, D.L., Church, D.M., Federhen, S., Lash, A.E., Madden, T.L., Pontius, J.U., Schuler, G.D., Schriml, L.M., Sequeira, E., Tatusova, T.A. *et al.* (2003) Database resources of the National Center for Biotechnology. *Nucl.Acids Res.*, **31**, 28-33.
